# Supplementary material for: Utilization of Monosaccharides by <em>Hungateiclostridium thermocellum</em> ATCC 27405 Through Adaptive Evolution
Source: Preprints.org preprint supplement (doi:10.20944/preprints202012.0496.v1), 2020-12-21
Supplement: Supplementary file 1 [file supplementary]

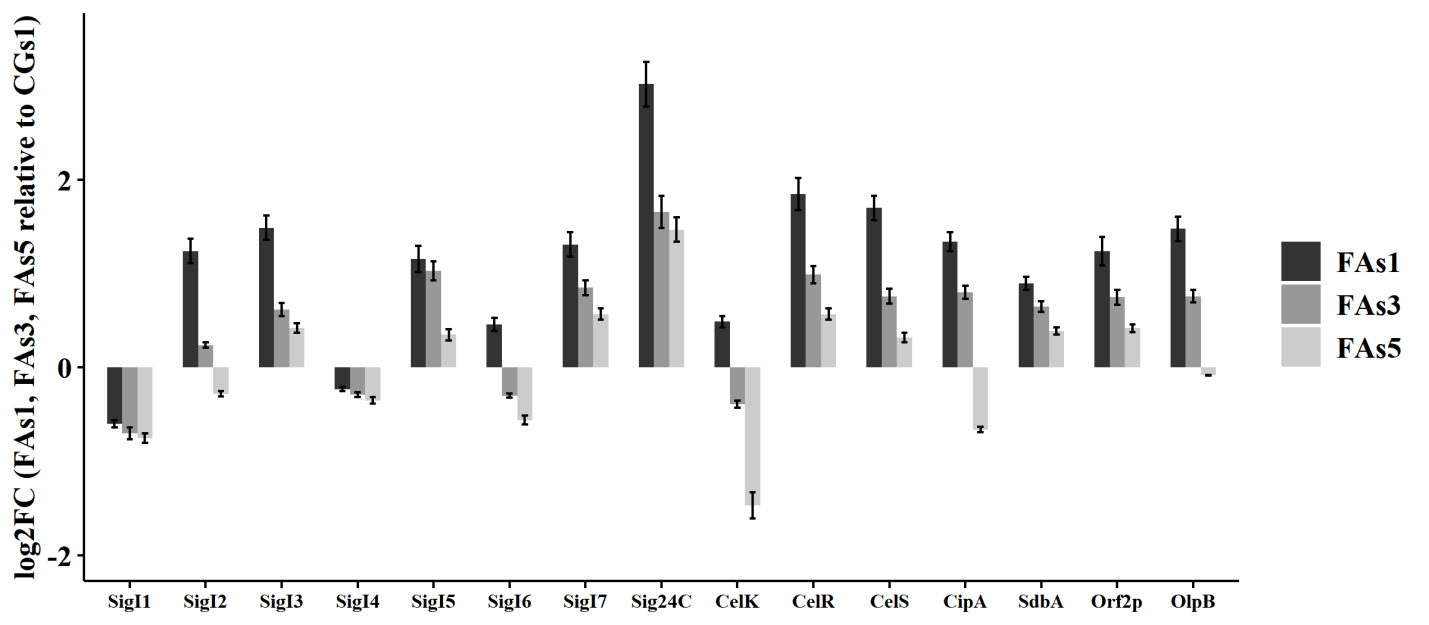


**Figure** **S1** Expression of genes from FAs1, FAs3, FAs5 relative to CGs1. Fifteen genes including sigma factor genes SigI1 (Cthe_0058), SigI2 (Cthe_0267), SigI3 (Cthe_0315), SigI4 (Cthe_0403), SigI5 (Cthe_1272), SigI6 (Cthe_2120), SigI7 (Cthe_2521), Sig24C (Cthe_1470), CelK (Cthe_0412), CelR (Cthe_0578), CelS (Cthe_2089), CipA (Cthe_3077), SdbA (Cthe_1307), Orf2p (Cthe_3079), OlpB (Cthe_3078) were selected for RT-qPCR. The experiments were performed with 3 biological replicates.
