# Supplementary material for: Utilization of Monosaccharides by <em>Hungateiclostridium thermocellum</em> ATCC 27405 Through Adaptive Evolution
Source: Preprints.org preprint supplement (doi:10.20944/preprints202012.0496.v1), 2020-12-21
Supplement: Supplementary file 3 [file Figure S2, Figure S3 Venn diagrams showing the commonalities between three R packages edgeR, DESeq2, NOISeq.docx]

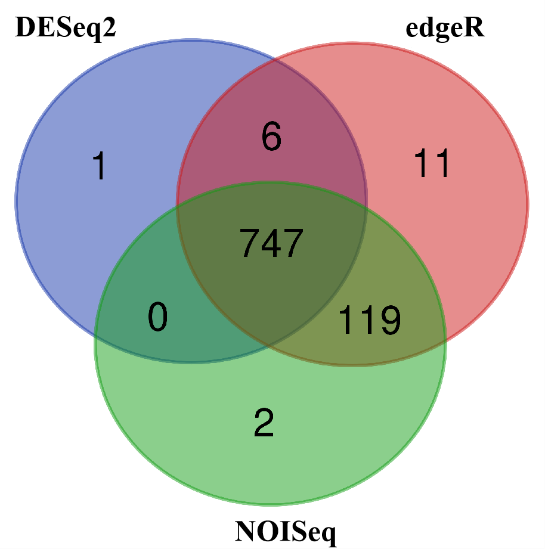

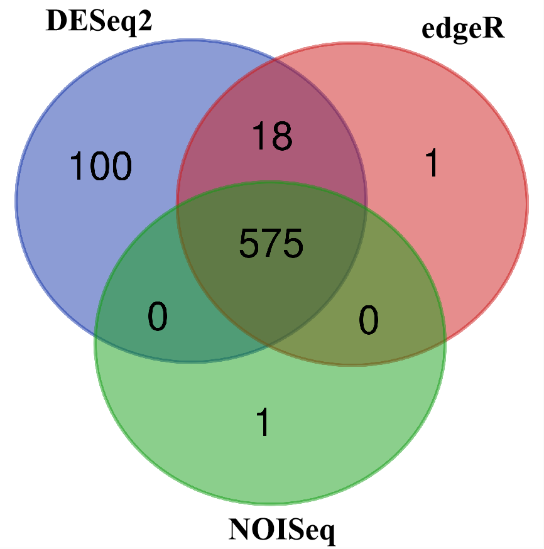


**B**

**A**

**Figure S2** Venn diagrams showed the commonalities between three R packages DESeq2, edgeR and NOISeq for differential expression analyses. (A) The overlapping part was the number of upregulated genes in FAs1 relative to CGs1. (B) The overlapping part was the number of downregulated genes in FAs1 relative to CGs1.


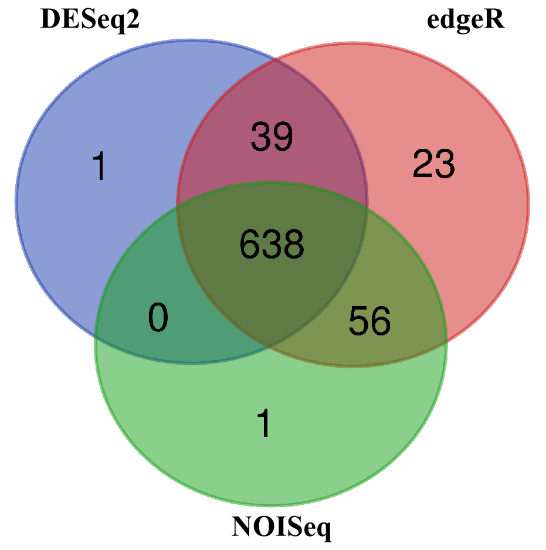

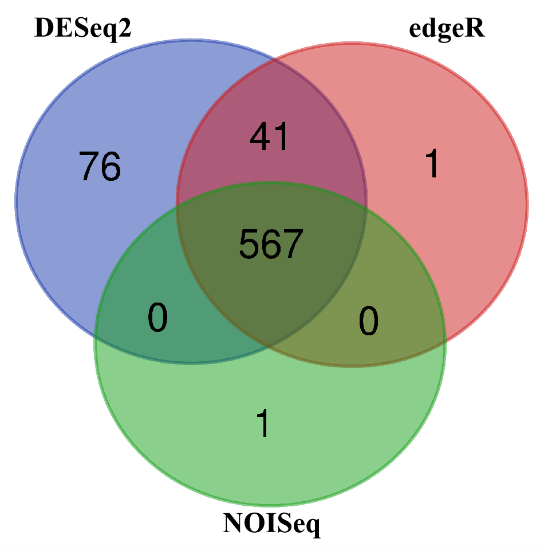


**B**

**A**

**Figure S3** Venn diagrams showed the commonalities between 3 R packages DESeq2, edgeR, and NOISeq for differential expression analyses. (A)The overlapping part was the number of upregulated genes in GAs1 relative to CGs1. (B) The overlapping part was the number of downregulated genes in GAs1 relative to CGs1.
