# Supplementary material for: Utilization of Monosaccharides by <em>Hungateiclostridium thermocellum</em> ATCC 27405 Through Adaptive Evolution
Source: Preprints.org preprint supplement (doi:10.20944/preprints202012.0496.v1), 2020-12-21
Supplement: Supplementary file 4 [file Figure S4 Correlation between RT-qPCR and RNA-seq.docx]

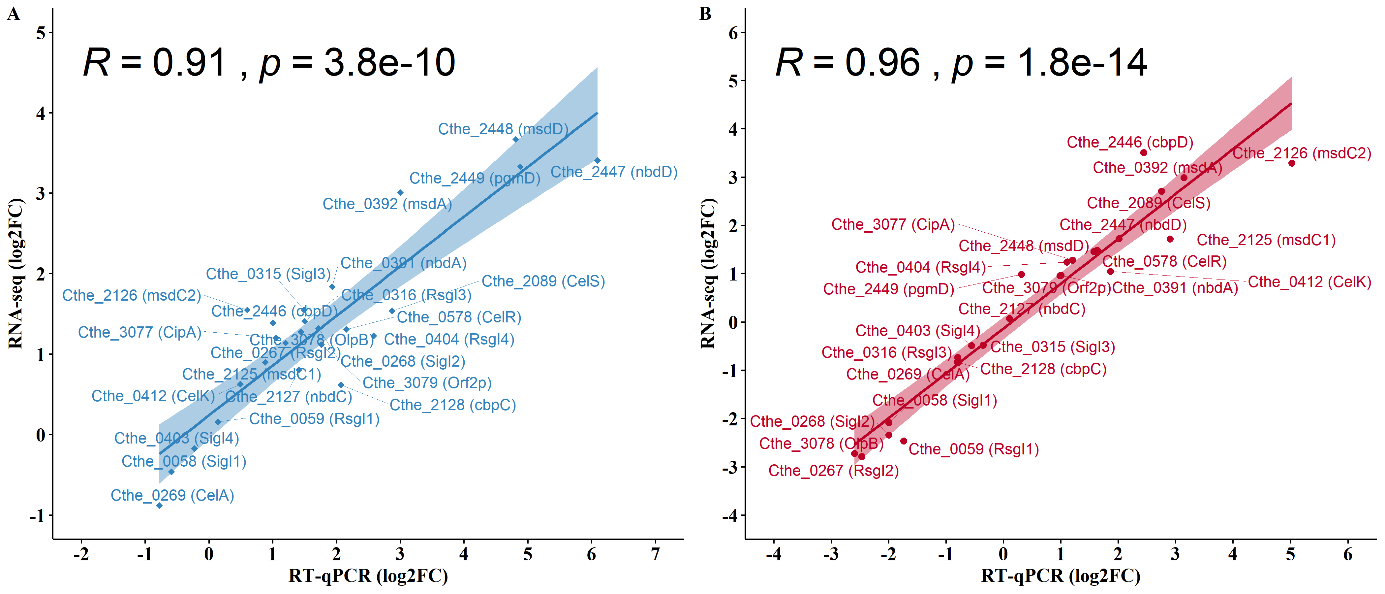


**Figure** **S4** Correlation between RNA-seq and RT-qPCR results. (A) Comparison of gene expression measurements of FAs1 relative to CGs1. (B) Comparison of gene expression measurements of GAs1 relative to CGs1. Twenty five genes Cthe_0391 (nbdA), Cthe_0392 (msdA), Cthe_3077 (CipA), Cthe_3078 (OlpB), Cthe_3079 (Orf2p), Cthe_2089 (CelS), Cthe_0412 (CelK), Cthe_0578 (CelR), Cthe_0269 (CelA), Cthe_0058 (SigI1), Cthe_0059 (RsgI1), Cthe_0268 (SigI2), Cthe_0267 (RsgI2), Cthe_0315 (SigI3), Cthe_0316 (RsgI3), Cthe_0403 (SigI4), Cthe_0404 (RsgI4), Cthe_2446 (cbpD), Cthe_2447 (nbdD), Cthe_2448 (msdD), Cthe_2449 (pgmD), Cthe_2125 (msdC1), Cthe_2126 (msdC2), Cthe_2127 (nbdC), Cthe_2128 (cbpC) were chosen to determine their levels of expression compared with their values in RNA-seq data.
