# Supplementary material for: Utilization of Monosaccharides by <em>Hungateiclostridium thermocellum</em> ATCC 27405 Through Adaptive Evolution
Source: Preprints.org preprint supplement (doi:10.20944/preprints202012.0496.v1), 2020-12-21
Supplement: Supplementary file 6 [file Figure S6 Expression of sugar transporter genes using RT-qPCR.docx]

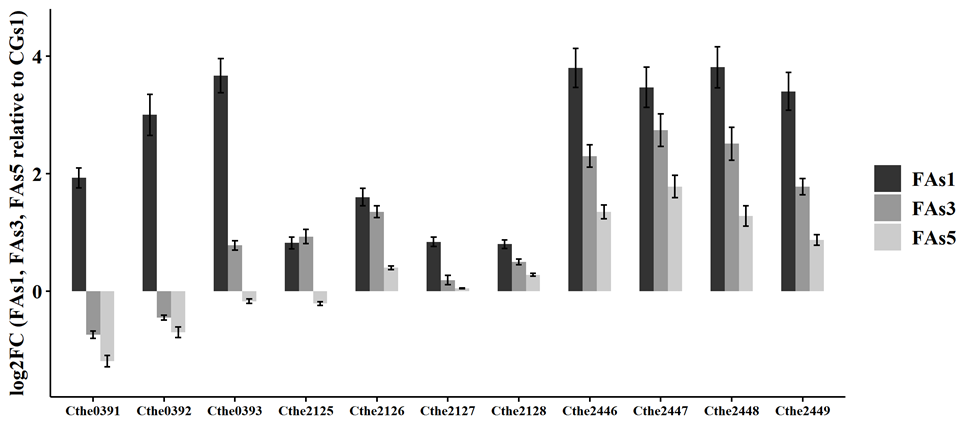


**Figure** **S5** Expression levels of CbpA, CbpC, and CbpD sugar transporters in FAs1, FAs3 and FAs5 relative to CGs1. Eleven genes nbdA (Cthe_0391), msdB (Cthe_0392), cbpA (Cthe_0393), msdC1 (Cthe_2125), msdC2 (Cthe_2126), nbdC (Cthe_2127), cbpC (Cthe_2128), cbpD (Cthe_2446), nbdD (Cthe_2447), msdD (Cthe_2448), and pgmD (Cthe_2449) were used for RT-qPCR. The experiments were performed with 3 biological replicates.
