# Supplementary material for: Utilization of Monosaccharides by <em>Hungateiclostridium thermocellum</em> ATCC 27405 Through Adaptive Evolution
Source: Preprints.org preprint supplement (doi:10.20944/preprints202012.0496.v1), 2020-12-21
Supplement: Supplementary file 7 [file Figure S7 Fructose-adapted cells.docx]

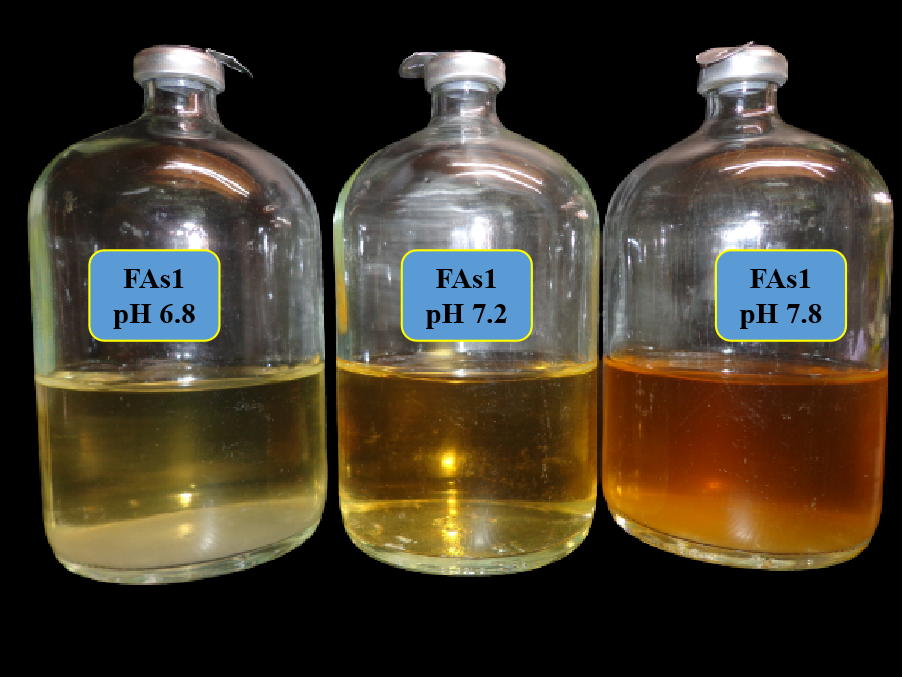


**Figure S7.** From left to right represent the FAs1 fermentation broth with yellowish color at pH 6.8, the FAs1 fermentation broth with dark yellow color at pH 7.2, and the FAs1 fermentation broth with brownish color at pH 7.8. This suggests stress response of *H. thermocellum* to harsh conditions
