# Supplementary material for: Utilization of Monosaccharides by <em>Hungateiclostridium thermocellum</em> ATCC 27405 Through Adaptive Evolution
Source: Preprints.org preprint supplement (doi:10.20944/preprints202012.0496.v1), 2020-12-21
Supplement: Supplementary file 8 [file Figure S8 Glucose-adapted cells.docx]

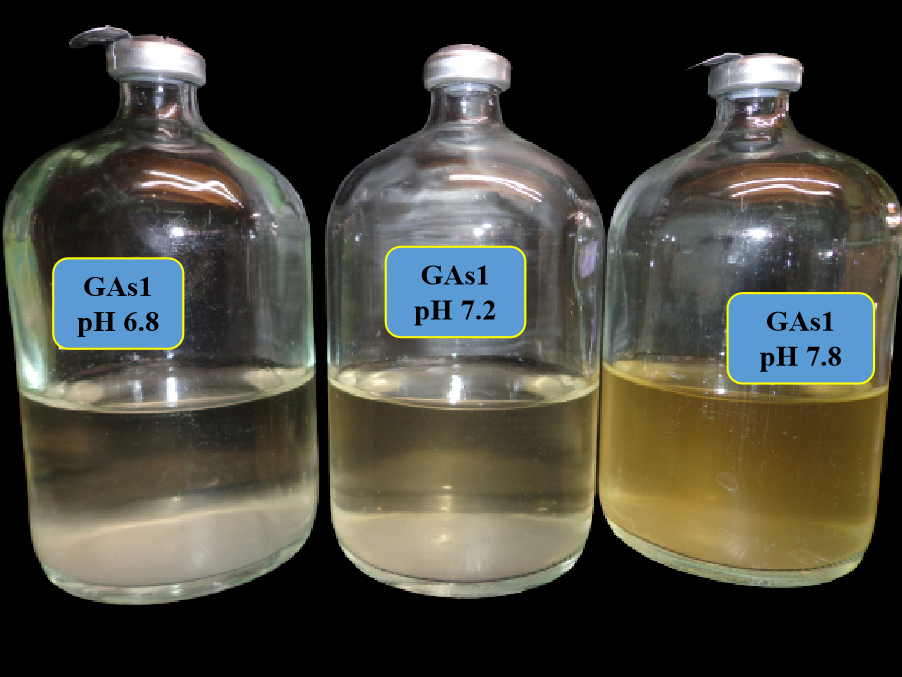


**Figure S8.** From left to right represented the GAs1 fermentation broth with white color at pH 6.8, GAs1 fermentation broth with light yellow at pH 7.2, and GAs1 fermentation broth with dark yellow at pH 7.8. This suggested stress response of *H. thermocellum* to harsh conditions
