# Supplementary material for: Utilization of Monosaccharides by <em>Hungateiclostridium thermocellum</em> ATCC 27405 Through Adaptive Evolution
Source: Preprints.org preprint supplement (doi:10.20944/preprints202012.0496.v1), 2020-12-21
Supplement: Supplementary file 9 [file Table S1 List of cellulosomal and non-cellulosomal genes with differential expression.docx]

**Table S1.** List of cellulosomal and non-cellulosomal genes with their log2FC determined in FAs1 vs. CGs1 and GAs1 vs. CGs1

| **Gene ID** | **Protein** | **GH, CBM family** | **FAs1 vs. CGs1**  **(log2FC)** | **GAs1 vs. CGs1**  **(log2FC)** |
| --- | --- | --- | --- | --- |
| **Cellulosomal genes** | | | | |
| Cthe_0032 | Dockerin type 1 cellulosome, β-mannanase, Ctman | CBM35, GH26 | -0.13 | -1.13 |
| Cthe_0071 | Endo-β-1,4-glucanase Y, CelY | GH48, CBM3 | 0.62 | 1.13 |
| Cthe_0109 | Dockerin type 1 cellulosome | n/a | 2.82 | 0.12 |
| Cthe_0211 | Endo-1,3(4)-β-glucanase | GH16 | 1.41 | 0.92 |
| Cthe_0212 | Exo-β-glucosidase, bglA | GH1 | 1.42 | -1.81 |
| Cthe_0246 | Carbohydrate binding family 6 | CBM35, PL11 | -0.69 | -1.89 |
| Cthe_0274 | Endoglucanase P, CelP | GH9 | 2.47 | -1.34 |
| Cthe_0412 | Cellulase K | CBM4, GH9 | 0.63 | 1.05 |
| Cthe_0413 | Cellulose 1,4-β-cellobiosidase | CBM4, GH9, CBM3 | 1.76 | 2.37 |
| Cthe_0452 | Cellulosome anchoring protein cohesin region, OlpC | n/a | -2.18 | -0.79 |
| Cthe_0536 | Endo-β-1,4-glucanase B, CelB | GH5 | -0.58 | -1.75 |
| Cthe_0557 | Polysaccharide deacetylase | CE4 | 2.57 | 2.39 |
| Cthe_0578 | Endo-β-1,4-glucanase R, CelR | GH9, CBM3 | 1.31 | 1.46 |
| Cthe_0624 | Processive endoglucanase J, CelJ | CBM30, GH9, GH44, CBM44 | -0.08 | -2.44 |
| Cthe_0625 | Endo-β-1,4-glucanase Q, CelQ | GH9, CBM3 | 2.03 | -1.94 |
| Cthe_0639 | Glycoside hydrolase family 13 domain protein | AMPK1_CBM | 1.76 | -0.11 |
| Cthe_0640 | Dockerin type 1 cellulosome | n/a | 0.54 | -1.2 |
| Cthe_0660 | Glycoside hydrolase family 81, β-1,3-glucanase | GH81 | 2.61 | 0.83 |
| Cthe_0729 | Dockerin type 1 cellulosome | n/a | -0.52 | -3.5 |
| Cthe_0735 | Cellulosome anchoring protein cohesin region | n/a | -1.98 | -1.88 |
| Cthe_0736 | Cellulosome anchoring protein cohesin region | n/a | 1.34 | 0.43 |
| Cthe_0745 | Glycoside hydrolase family 9, CelW | GH9, CBM3 | -1.06 | -1.35 |
| Cthe_0797 | Acetylxylan esterase/6-O-glycoside deacetylase, CelE | GH5, CE2 | -2.4 | -3.74 |
| Cthe_0798 | Acetyl xylan esterase, CtCes3 | CE3, CE3 | 0.95 | 1.13 |
| Cthe_0912 | Glycoside hydrolase family 10, xylanase Y | CBM22, GH10, CBM22, CE1 | -0.32 | -1.02 |
| Cthe_0918 | Dockerin type 1 cellulosome | n/a | -0.88 | -1.08 |
| Cthe_1271 | β-Xylosidase | GH43, CBM6, CBM6 | -1.3 | -2.7 |
| Cthe_1307 | Cellulosome anchoring protein cohesin region, SdbA | n/a | 0.8 | -1.11 |
| Cthe_1398 | Xyloglucanase, Xgh74A | GH74 | -1.72 | -2.39 |
| Cthe_1400 | Arabinogalactan endo-β-1,4-galactanase | GH53 | 0.81 | -1.23 |
| Cthe_1472 | Bifunctional endo-β-1,4-glucanase/β-1,4-xylanase H, CelH | GH26, GH5, CBM11 | 2.23 | 3.03 |
| Cthe_1806 | Dockerin type 1 cellulosome | n/a | 0.9 | 1.9 |
| Cthe_1890 | Dockerin type 1 cellulosome | n/a | 3.29 | -0.66 |
| Cthe_1911 | Carbohydrate binding family 6 | CBM6 | -1.04 | -0.26 |
| Cthe_2038 | Dockerin type 1 cellulosome | n/a | 1.53 | -0.91 |
| Cthe_2089 | Glycoside hydrolase family 48, exoglucanase, CelS | GH48 | 1.54 | 2.71 |
| Cthe_2137 | Carbohydrate binding family 6 | GH39, CBM35, CBM35 | 2.23 | 1.39 |
| Cthe_2138 | Glycoside hydrolase family 43 | CBM42, GH43 | -0.16 | -2.65 |
| Cthe_2167 | Glycoside hydrolase | GH126 | 2.83 | 2.26 |
| Cthe_2179 | Pectate lyase/Amb allergen | PL1, CBM35, PL9 | 0.43 | -1.13 |
| Cthe_2193 | Xylanase, CtXyl5A | GH5, CBM6, CBM13, CBM62 | -0.19 | 1.06 |
| Cthe_2195 | Xylanase E, XynE | GH141, CBM6 | 1.59 | 0.5 |
| Cthe_2196 | Glycoside hydrolase family 43 | GH43, CBM6 | 1.26 | 1.22 |
| Cthe_2197 | β-galactosidase/β-glucuronidase | GH2, CBM6 | 3.1 | 1.2 |
| Cthe_2271 | Dockerin type 1 cellulosome | n/a | 2.93 | 2.54 |
| Cthe_2360 | Glycoside hydrolase family 9, CelU | GH9, CBM3, CBM3 | 1.79 | 0.38 |
| Cthe_2549 | Dockerin type 1 cellulosome | n/a | 1.39 | 0.79 |
| Cthe_2590 | Glycoside hydrolase family 10, beta-1,4-xylanase D | GH10, CBM22 | -0.67 | -2.62 |
| Cthe_2760 | Glycoside hydrolase family 9, endoglucanase V, CelV | GH9, CBM3, CBM3 | -1.24 | -2.87 |
| Cthe_2761 | Glycoside hydrolase family 9, LecA | GH9, CBM3 | -1.16 | -2.61 |
| Cthe_2805 | Carbohydrate-binding, CenC-like protein | CBM16 | 1.38 | -0.37 |
| Cthe_2811 | Dockerin type 1 cellulosome | GH26, CBM | 1.95 | -0.59 |
| Cthe_2812 | Glycoside hydrolase family 9, CelT | GH9 | 1.41 | -1.56 |
| Cthe_2872 | Glycoside hydrolase family 5, CelG | GH5 | 1.05 | -1.08 |
| Cthe_2950 | Pectate lyase | PL1, CBM35 | -1.06 | -1.49 |
| Cthe_2972 | Glycoside hydrolase family 11, XynA/U | GH11, CBM6, CE4 | 0.17 | -2.47 |
| Cthe_3012 | Glucuronoxylan xylanohydrolase, CtXyn30 | GH30, CBM6 | -1.42 | -1.61 |
| Cthe_3077 | Cellulosome anchoring protein cohesin region, CipA | CBM3 | 1.2 | 1.28 |
| Cthe_3078 | Cellulosome anchoring protein cohesin region, OlpB | n/a | 1.28 | -2.72 |
| Cthe_3079 | Cellulosome anchoring protein cohesin region, Orf2p | n/a | 1.12 | 0.96 |
| Cthe_3080 | Cellulosome anchoring protein cohesin region, OlpA | n/a | 0.96 | -1.61 |
| Cthe_3132 | Dockerin type 1 cellulosome | n/a | 1.29 | 0.42 |
| Cthe_3141 | Rhamnogalacturonan acetylesterase 12A | CE12, CBM35, CE12 | -0.79 | -2.35 |
| **Non-cellulosomal genes** | | | | |
| Cthe_0043 | Endoglucanase N, CelN | GH9, CBM3 | 1.59 | 0.56 |
| Cthe_0322 | Glycoside hydrolase family 3 | GH3 | 1.6 | 0.96 |
| Cthe_1221 | Cellobiose phosphorylase | GT84, GHnc, GH94 | 1.01 | 0.5 |
| Cthe_1256 | β-glucosidase B | GH3 | 0.81 | 1.85 |
| Cthe_1257 | Carbohydrate-binding CenC domain protein | CBM3, CBM4 | 1.94 | 1.66 |
| Cthe_1428 | Glycoside hydrolase family 11 | GH1 | 1.34 | 1.91 |
| Cthe_2191 | 1,4-α-glucan branching enzyme GlgB | CBM48, GH13 | 2.09 | 1.07 |
| Cthe_2809 | Glucan endo-1,3-β-D-glucosidase, LicA | CBM54, GH16, CBM4, CBM4, CBM4, CBM4 | -0.73 | -1.75 |
| Cthe_3063 | Acetyl xylan esterase | CE7 | 3.08 | 1.97 |
|  | | | | |
