# Supplementary material for: Utilization of Monosaccharides by <em>Hungateiclostridium thermocellum</em> ATCC 27405 Through Adaptive Evolution
Source: Preprints.org preprint supplement (doi:10.20944/preprints202012.0496.v1), 2020-12-21
Supplement: Supplementary file 10 [file Table S2 Primers list for RT-qPCR.docx]

Table S2 Primers list for RT-qPCR

| Gene ID | Primer Sequence | Source of reference |
| --- | --- | --- |
| 16S | F-5’-CGATCGGTAGCCGAACTGA-3’  R-5’-GAGTCTGGGCCGTGTCTCA-3’ | Appl. Environ. Microbiol. 2005:71(8):4672-4678. |
| Cthe_0058 | F: 5’-TGAAAGTTACCTCAAATGCCAC-3’  R: 5’-CGCCTTCTTATTACCTGCTC-3’ | This study |
| Cthe_0059 | F: 5’-AACATTACAGCCTTCAACGC-3’  R: 5’-CGCCCAGTTCATTTCATCAA-3’ | This study |
| Cthe_0267 | F: 5’-GGAAATACGCCAATAACGCTCTC-3’  R: 5’-AAGTAATGTTTGACCAGTCGCATGT-3’ | This study |
| Cthe_0268 | F: 5’-CGCACCAAAGCACAAAGATTCA-3’  R: 5’-TTTCGGTATGTTTCGGGTTCTCTC-3’ | This study |
| Cthe_0269 | F-5’- GTAACTGCAATGCTCAAAGCAGAAT-3’  R-5’- CAAAAGAAGTCCGTATCCCATACCT-3’ | This study |
| Cthe_0315 | F: 5’-CCATTGACAGATATGATGCCG-3’  R: 5’-CCACCCGAGTTGATTCTTCA-3’ | This study |
| Cthe_0316 | F: 5’-GTCAAGCAAGAGCCAGCAAAAG-3’  R: 5’-TTCCGCACTCAAACCGTTTACATC-3’ | This study |
| Cthe_0391 | F: 5’- CTTTGTTTGTGTCCGCATCTTTC-3’  R: 5’- AGTATCGCATCGGCATCTTCA-3’ | This study |
| Cthe_0392 | F: 5’- GGCTTATTGTCTCTGGCACGCTTTAACG-3’  R: 5’-ACCCAAAACAGTTCCCAGTACGCCTC-3 | This study |
| Cthe_0403 | F: 5’-AACTCACCGAAACACAAGGACTC-3’  R: 5’-TTTCCGATGGACATTAACCAATCCC-3’ | This study |
| Cthe_0404 | F: 5’-GCGTTAAACAGTGATGAGCA-3’  R: 5’-TTTCCTGTGCCTTCTTCCTT-3’ | This study |
| Cthe_0412 | F: 5’-TGATGAATATGCAGGAAGACCTCAA-3’  R-5’-ACAGCTATACCGCCGTTTACAACAT-3’ | This study |
| Cthe_0578 | F-5’-TGAGTACAAGGACGCGTTACAAAAA-3’  R-5’-TCGGGATGGCATCTTATGAAGTAGT-3’ | This study |
| Cthe_2089 | F-5’- GACAACTGGTACGGTTTTGGTACAG-3’  R-5’- TGAACTCTTCTATTGACGGATGAGG-3’ | This study |
| Cthe_2125 | F: 5’-GGTTACCCTCGTTCCCAATT-3’  R: 5’- AGCACTCATCAGGTATTCCC-3’ | This study |
| Cthe_2126 | F: 5’-TTTTCGTCGCCGTACCTTGC-3’  R: 5’- AACTCAAAGCTGCCCACTCCTC-3’ | This study |
| Cthe_2127 | F: 5’-AAGTTCAGAGCGAGACCAAT-3’  R: 5’-CCCAATCCATACCAACAAGC-3’ | This study |
| Cthe_2128 | F: 5’-TCAGGAGAAGAAGGAAAGACCACC-3’  R: 5’-GCTCGTCAACCAGTACACATTCAG-3’ | This study |
| Cthe_2446 | F: 5’-CAGGAGAAGCAATCAACAATGC-3’  R: 5’-CACCATACGGGTCAGTATTTCC-3’ | This study |
| Cthe_2447 | F: 5’-CGAAGGCAGGGAAGTAAACATAAA-3’  R: 5’-CTCTCCATACGACGGCAACA-3’ | This study |
| Cthe_2448 | F: 5’-GGAATTGGAAGCGTCGTAGGT-3’  R: 5’-TGAAATCCTCAGAAGTGTGATACAGG-3’ | This study |
| Cthe_2449 | F: 5’-GGTTTTCTCAAGCCCGCTTTTG-3’  R: 5’-AAGCCGCAATGACTGTCCTTC-3’ | This study |
| Cthe_3077 | F-5’-TGAAATAACCGGAGTACCTGCAAAT-3’  R-5’-CACATCATTATTGGAGCCTGTGAAG-3’ | This study |
| Cthe_3078 | F-5’-GTACTGAAGGCAGGAAGTACGGCTA-3’  R-5’-CACTATTTCCCCAGGCTGTACTACG-3’ | This study |
| Cthe_3079 | F-5’-ACTGGGCACAACAGTTTATTGAACA-3’  R-5’-TGTTTATCAGGGCAACACTTTCTGA-3’ | This study |

References

1. Stevenson, DM, Weimer P. Expression of 17 genes in *Clostridium thermocellum* ATCC 27405 during fermentation of cellulose or cellobiose in continuous culture. Appl Environ Microbiol. 71:4672–8.
