# Supplementary material for: Utilization of Monosaccharides by <em>Hungateiclostridium thermocellum</em> ATCC 27405 Through Adaptive Evolution
Source: Preprints.org preprint supplement (doi:10.20944/preprints202012.0496.v1), 2020-12-21
Supplement: Supplementary file 11 [file Table S3 Differentially expressed genes in the G cluster (FAs1, GAs1 vs CGs1).xlsx]

## Sheet: Sheet1
id	gene	protein	FAs1 vs. CGs1	GAs1 vs. CGs1
1	Cthe_0032	"Dockerin type 1 cellulosome, β-mannanase"	-0.13	-1.13
2	Cthe_0043	"Endoglucanase N"	1.5906	0.56
3	Cthe_0054	"Family 10 glycosyl hydrolase"	0.07	1.87
4	Cthe_0058	"RNA polymerase sigma-I factor, SigI1"	-0.46	-2.08
5	Cthe_0059	"Type 3a cellulose-binding domain protein, RsgI1"	0.16	-2.46
6	Cthe_0071	"Endo-β-1,4-glucanase Y, CelY"	0.62	1.13
7	Cthe_0109	"Dockerin type 1 cellulosome"	2.82	0.12
8	Cthe_0143	"Phosphopyruvate hydratase"	0.1	-1
9	Cthe_0149	"HPrNtr domain-containing protein"	1.52	-1.07
10	Cthe_0175	"Polysaccharide deacetylase family protein"	0.16	-1.23
11	Cthe_0211	"Endo-1,3(4)-β-glucanase"	1.41	0.92
12	Cthe_0212	"Beta-glucosidase, bglA"	1.42	-1.81
13	Cthe_0217	"Glucose-6-phosphate isomerase"	-1.27	-1.99
14	Cthe_0246	"Carbohydrate binding family 6"	-0.69	-1.89
15	Cthe_0267	"Type 3a cellulose-binding domain protein, RsgI2"	1.14	-2.78
16	Cthe_0268	"RNA polymerase sigma-I factor, SigI2"	1.32	-2.34
17	Cthe_0274	"Endoglucanase P"	2.47	-1.34
18	Cthe_0275	"Cellobiose phosphorylase"	-1.42965	-0.96
19	Cthe_0282	"Glycogen synthase, GlgA"	2.12566	1.4
20	Cthe_0314	"Glycosyltransferase 28 domain-containing protein"	1.32736	0.1
21	Cthe_0316	"PA14 domain protein, RsgI3"	1.41194	-0.73
22	Cthe_0322	"Glycoside hydrolase family 3 domain protein"	1.60336	0.96
23	Cthe_0336	"AraC family transcriptional regulator"	-1.08286	-0.58
24	Cthe_0344	"Malic enzyme"	-2	-0.51
25	Cthe_0345	"L-malate dehydrogenase"	-1.82	-2.17
26	Cthe_0347	"Phosphofructokinase"	-1.14	-2.12
27	Cthe_0349	"Fructose-1,6-bisphosphate aldolase, class II"	-1.20772	-0.56
28	Cthe_0357	"Alpha-glucan phosphorylase"	2.31626	0.02
29	Cthe_0389	"Phosphofructokinase"	-1.11	-1.25
30	Cthe_0390	"Glucokinase, ROK family"	-1.13088	-1.08
31	Cthe_0391	"ATP-binding protein (nbdA)"	1.8387	0.97
32	Cthe_0392	"Inner-membrane translocator (msdA)"	3.01236	3.14
33	Cthe_0393	"Ribose ABC transporter (CbpA)"	3.98398	3.02
34	Cthe_0395	"RbsD or FucU transporter"	3.18775	2.3
35	Cthe_0404	"Type 3a cellulose-binding domain protein, RsgI4"	1.23384	1.24
36	Cthe_0410	"Pyruvate formate lyase (PFL) family protein"	-1.01958	-0.69
37	Cthe_0412	"Cellulase K"	0.63	1.05
38	Cthe_0413	"Cellulose 1,4-beta-cellobiosidase"	1.76378	2.37
39	Cthe_0423	"Bifunctional acetaldehyde-CoA/alcohol dehydrogenase"	1.22	2.34
40	Cthe_0452	"Cellulosome anchoring protein cohesin region, OlpC"	-2.17538	-0.79
41	Cthe_0536	"Endo-beta-1,4-glucanase B"	-0.58	-1.75
42	Cthe_0557	"Polysaccharide deacetylase"	2.56562	2.39
43	Cthe_0578	"Endo-beta-1,4-glucanase R"	1.31	1.46
44	Cthe_0624	"Processive endoglucanase J"	-0.08	-2.44
45	Cthe_0625	"Endo-beta-1,4-glucanase Q"	2.03341	-1.94
46	Cthe_0639	"Glycoside hydrolase family 13 domain protein"	1.75976	-0.11
47	Cthe_0640	"Dockerin type 1 cellulosome"	0.54	-1.2
48	Cthe_0660	"Glycoside hydrolase family 81, beta-1,3-glucanase"	2.61195	0.83
49	Cthe_0707	"Phosphoglycerate mutase"	0.79	-1.07
50	Cthe_0729	"Dockerin type 1 cellulosome"	-0.52	-3.5
51	Cthe_0735	"Cellulosome anchoring protein cohesin region"	-1.9826	-1.88
52	Cthe_0736	"Cellulosome anchoring protein cohesin region"	1.34	0.43
53	Cthe_0745	"Glycoside hydrolase family 9, CelW"	-1.05588	-1.35
54	Cthe_0797	"Acetylxylan esterase/6-O-glycoside deacetylase, CelE"	-2.39743	-3.74
55	Cthe_0798	"Acetyl xylan esterase, CtCes3"	0.95	1.13
56	Cthe_0876	"Glycosyl transferase"	1.38265	1.9
57	Cthe_0912	"Glycoside hydrolase family 10, xylanase Y"	-0.32	-1.02
58	Cthe_0918	"Dockerin type 1 cellulosome"	-0.88	-1.08
59	Cthe_0946	"Phosphoglycerate mutase"	-1.59815	-0.47
60	Cthe_0993	"YlxR family protein"	-2.63075	-0.9
61	Cthe_1019	"Transmembrane sugar transport protein (msdB1)"	1.23	0.63
62	Cthe_1029	"Phosphate acetyltransferase"	0.86	1.15
63	Cthe_1046	"Multiple sugar transport system substrate-binding protein"	1.45997	1.37
64	Cthe_1202	"MFS transporter"	0.32	-1.13
65	Cthe_1221	"Cellobiose phosphorylase"	1.01	0.5
66	Cthe_1253	"Pyruvate phosphate dikinase"	1.34019	0.1
67	Cthe_1256	"Thermostable beta-glucosidase B, BglB"	0.81	1.85
68	Cthe_1257	"Carbohydrate-binding CenC domain protein"	1.93517	1.66
69	Cthe_1261	"6-phosphofructokinase, PfkA"	-1.24912	0.11
70	Cthe_1265	"Phosphoglucomutase"	-1.54276	0.23
71	Cthe_1271	"Beta-Xylosidase"	-1.29953	-2.7
72	Cthe_1273	"Alpha-L-arabinofuranosidase B, RsgI5"	0.06	-1.93
73	Cthe_1280	"Transglycosylase-associated protein"	2.64204	0.27
74	Cthe_1292	"Cofactor-independent phosphoglycerate mutase"	0.62	-1.81
75	Cthe_1303	"Glycosyltransferase family 4 protein"	-0.53	-1.11
76	Cthe_1307	"Cellulosome anchoring protein cohesin region SdbA"	0.8	-1.11
77	Cthe_1355	"Glycosyltransferase family 2 protein"	1.23747	-0.41
78	Cthe_1356	"Glycosyltransferase"	-0.61	-1.25
79	Cthe_1379	"Gfo/Idh/MocA family oxidoreductase"	1.83612	2.26
80	Cthe_1398	"Xyloglucanase Xgh74A"	-1.72473	-2.39
81	Cthe_1400	"Arabinogalactan endo-beta-1,4-galactanase"	0.81	-1.23
82	Cthe_1428	"Glycoside hydrolase family 1 protein"	1.34005	1.91
83	Cthe_1445	"AraC family transcriptional regulator"	2.11148	2.65
84	Cthe_1470	"RNA polymerase, sigma-24 subunit, ECF subfamily, Sig24C"	2.54018	1
85	Cthe_1471	"Anti sigma factor Rsi24C"	2.38455	-1.33
86	Cthe_1472	"Bifunctional endo-beta-1,4-glucanase/beta-1,4-xylanase H CelH"	2.22503	3.03
87	Cthe_1579	"Simple sugar transport system ATP-binding protein"	1.50559	2.1
88	Cthe_1580	"Simple sugar transport system permease protein"	1.49012	1.8
89	Cthe_1581	"Inner-membrane translocator"	1.24353	1.8
90	Cthe_1584	"Two component transcriptional regulator, AraC family"	1.05449	1.6
91	Cthe_1592	"Glycerate kinase"	1.21691	0.15
92	Cthe_1806	"Dockerin type 1, cellulosome protein"	0.9	1.9
93	Cthe_1890	"Dockerin type 1, cellulosome protein"	3.29	-0.66
94	Cthe_1903	"Polysaccharide deacetylase"	3.83726	1.46
95	Cthe_1905	"Glycosyltransferase family 28"	1.57591	1.04
96	Cthe_1906	"Glycosyltransferase family 28"	1.17034	0.41
97	Cthe_1911	"Carbohydrate binding family 6"	-1.0404	-0.26
98	Cthe_1956	"Tagatose-6-phosphate kinase"	0.33	-1.25
99	Cthe_2038	"Dockerin type 1 cellulosome"	1.52636	-0.91
100	Cthe_2089	"Glycoside hydrolase family 48, exoglucanase S"	1.53892	2.71
101	Cthe_2125	"Binding-protein-dependent transport systems (msdC1)"	0.9	1.72
102	Cthe_2126	"Permease component (msdC2)"	1.55084	3.29
103	Cthe_2137	"Carbohydrate binding family 6"	2.22837	1.39
104	Cthe_2138	"Glycoside hydrolase family 43"	-0.16	-2.65
105	Cthe_2159	"Carbohydrate-binding domain-containing protein"	-3.21053	-2.22
106	Cthe_2167	"Glycoside hydrolase"	2.82875	2.26
107	Cthe_2179	"Pectate lyase/Amb allergen"	0.43	-1.13
108	Cthe_2191	"1,4-alpha-glucan branching enzyme GlgB"	2.094	1.07
109	Cthe_2193	"Xylanase, CtXyl5A"	-0.19	1.06
110	Cthe_2195	"Carbohydrate binding family 6, xylanase E XynE"	1.59292	0.5
111	Cthe_2196	"Glycoside hydrolase family 43"	1.26075	1.22
112	Cthe_2197	"Beta-galactosidase/beta-glucuronidase"	3.09999	1.2
113	Cthe_2238	"Aldehyde dehydrogenase"	0	1.07
114	Cthe_2271	"Dockerin type 1 cellulosome"	2.93	2.54
115	Cthe_2360	"Glycoside hydrolase family 9, CelU"	1.78604	0.38
116	Cthe_2441	"Transcriptional regulator, DeoR family"	3.47268	0.42
117	Cthe_2442	"Carbohydrate kinase, FGGY-like protein"	3.00624	-0.46
118	Cthe_2443	"Transketolase domain-containing protein"	2.93365	0.63
119	Cthe_2444	"Transketolase domain-containing protein"	4.13496	1.36
120	Cthe_2446	"Ribose ABC transporter (cbpD)"	3.50505	1.39
121	Cthe_2447	"ATP-binding protein (nbdD)"	3.41089	1.73
122	Cthe_2448	"Inner-membrane translocator (msdD)"	3.66547	1.49
123	Cthe_2449	"Phosphoglycerate mutase (pgmD)"	3.32527	0.99
124	Cthe_2503	"Mannose-6-phosphate isomerase"	0.66	1.47
125	Cthe_2549	"Dockerin type 1 cellulosome"	1.39092	0.79
126	Cthe_2550	"Glycosyl transferase"	1.73583	-0.43
127	Cthe_2558	"NAD-dependent epimerase/dehydratase"	1.74513	-0.55
128	Cthe_2559	"DegT/DnrJ/EryC1/StrS aminotransferase"	1.60751	1.83
129	Cthe_2560	"dTDP-4-dehydrorhamnose 3,5-epimerase"	1.44884	-1.39
130	Cthe_2561	"CDP-glucose 4,6-dehydratase"	1.88898	1.42
131	Cthe_2562	"Glucose-1-phosphate cytidylyltransferase"	1.32183	0.34
132	Cthe_2589	"4-amino-4-deoxy-L-arabinose transferase and related glycosyltransferases of PMT family"	1.69982	0.33
133	Cthe_2590	"Glycoside hydrolase family 10, beta-1,4-xylanase D"	-0.67	-2.62
134	Cthe_2600	"Glycosyl transferase, family 4, conserved region"	0.62	1.8
135	Cthe_2629	"Bifunctional N-acetylglucosamine-1-phosphate uridyltransferase/glucosamine-1-phosphate acetyltransferase"	-1.50581	-0.86
136	Cthe_2630	"Ribose-phosphate pyrophosphokinase"	-1.98147	-0.76
137	Cthe_2637	"Glycosyl transferase group 1"	2.5487	1.4
138	Cthe_2638	"O-antigen polymerase"	3.52755	0.23
139	Cthe_2639	"Acylneuraminate cytidylyltransferase"	2.39194	1.35
140	Cthe_2645	"NAD-dependent epimerase/dehydratase"	1.54358	0.85
141	Cthe_2650	"Polysaccharide biosynthesis protein CapD"	1.73337	0.79
142	Cthe_2696	"Carbohydrate kinase, YjeF related protein"	-1.34041	0.19
143	Cthe_2701	"Glycosyl transferase, WecB/TagA/CpsF family"	1.17	1.96
144	Cthe_2760	"Glycoside hydrolase family 9, endoglucanase V, CelV"	-1.24	-2.87
145	Cthe_2761	"Glycoside hydrolase family 9, LecA"	-1.16	-2.61
146	Cthe_2805	"Carbohydrate-binding, CenC-like protein"	1.38222	-0.37
147	Cthe_2809	"Glucan endo-1,3-beta-D-glucosidase, LicA"	-0.73	-1.75
148	Cthe_2811	"Dockerin type 1 cellulosome"	1.94935	-0.59
149	Cthe_2812	"Glycoside hydrolase family 9"	1.41293	-1.56
150	Cthe_2872	"Glycoside hydrolase family 5"	1.05	-1.08
151	Cthe_2874	"Phosphoenolpyruvate carboxykinase (GTP)"	2.32	2.58
152	Cthe_2938	"Glucokinase, ROK family"	-1.72198	-1
153	Cthe_2950	"Pectate lyase"	-1.06	-1.49
154	Cthe_2972	"Glycoside hydrolase family 11"	0.17	-2.47
155	Cthe_2989	"Cellodextrin phosphorylase, Cdp"	-0.69	-1.47
156	Cthe_3012	"Glucuronoxylan xylanohydrolase, CtXyn30"	-1.42425	-1.61
157	Cthe_3063	"Acetyl xylan esterase"	3.0831	1.97
158	Cthe_3077	"Cellulosome anchoring protein cohesin region, CipA"	1.20155	1.28
159	Cthe_3078	"Cellulosome anchoring protein cohesin region, OlpB"	1.28215	-2.72
160	Cthe_3079	"Cellulosome anchoring protein cohesin region, Orf2p"	1.1188	0.96
161	Cthe_3080	"Cellulosome anchoring protein cohesin region, OlpA"	0.96	-1.61
162	Cthe_3094	"Glycosyl transferase family 2"	0.15	-1.75
163	Cthe_3095	"Phospholipid carrier-dependent glycosyltransferase"	1.05109	1.16
164	Cthe_3097	"Glycosyl transferase family 2"	1.73091	1.55
165	Cthe_3099	"Glycosyltransferase family 2 protein"	1.20392	-1.01
166	Cthe_3114	"Glycosyl transferase group 1"	-1.41632	-0.82
167	Cthe_3132	"Dockerin type 1 cellulosome"	1.28907	0.42
168	Cthe_3141	"Rhamnogalacturonan acetylesterase 12A"	-0.79	-2.35
