# Supplementary material for: Utilization of Monosaccharides by <em>Hungateiclostridium thermocellum</em> ATCC 27405 Through Adaptive Evolution
Source: Preprints.org preprint supplement (doi:10.20944/preprints202012.0496.v1), 2020-12-21
Supplement: Supplementary file 13 [file Table S5 Consumed sugar, CO2, H2, cell biomass, ethanol yield of FAs, GAs, CGs.xlsx]

## Sheet: Sheet1
Fructose-adapted cells (FAs)	Consumed sugar (g/L)	Consumed sugar (mmoles)	Ethanol (mmoles)	CO2 (mmoles)	H2 (mmoles)	Cell biomass (mmoles)	Ethanol yield (mmoles/mmoles)
FAs1	5.52 ± 0.75	30.64 ± 4.19	19.83 ± 2.67	3.24 ± 0.46	2.87 ± 0.38	2.23 ± 0.41	0.65 ± 0.03
FAs2	2.60 ± 0.28	14.45 ± 1.67	7.610 ± 1.13	1.79 ± 0.24	1.58 ± 0.19	3.14 ± 0.48	0.53 ± 0.02
FAs3	3.07 ± 0.47	17.08 ± 2.63	8.260 ± 1.36	2.14 ± 0.28	2.19 ± 0.29	5.36 ± 0.66	0.48 ± 0.02
FAs4	2.78 ± 0.50	15.44 ± 2.80	8.110 ± 1.68	2.09 ± 0.31	2.02 ± 0.28	4.62 ± 0.63	0.53 ± 0.03
FAs5	3.73 ± 0.29	20.72 ± 1.59	11.30 ± 1.21	2.74 ± 0.22	2.43 ± 0.20	5.51 ± 0.62	0.55 ± 0.04
FAs6	4.24 ± 0.25	23.54 ± 1.37	11.97 ± 0.98	2.83 ± 0.14	2.52 ± 0.11	7.15 ± 0.58	0.51 ± 0.02
FAs7	4.65 ± 0.33	25.86 ± 1.84	14.45 ± 1.24	2.98 ± 0.28	2.68 ± 0.24	6.40 ± 0.68	0.56 ± 0.05
FAs8	5.58 ± 0.49	31.00 ± 2.74	17.54 ± 1.06	3.68 ± 0.29	3.30 ± 0.24	7.45 ± 0.66	0.57 ± 0.06
Glucose-adapted cells (GAs)
GAs1	4.98 ± 1.27	27.67 ± 6.75	18.13 ± 4.50	4.42 ± 1.10	3.91 ± 0.85	3.50 ± 0.58	0.66 ± 0.04
GAs2	3.84 ± 0.41	21.32 ± 2.23	12.28 ± 3.85	3.35 ± 0.82	3.00 ± 0.73	4.25 ± 0.62	0.58 ± 0.06
GAs3	3.86 ± 0.45	21.42 ± 2.92	12.35 ± 1.18	3.41 ± 0.41	3.02 ± 0.33	4.25 ± 0.55	0.58 ± 0.05
GAs4	4.16 ± 0.43	23.12 ± 2.12	11.83 ± 1.23	3.29 ± 0.42	2.92 ± 0.45	6.03 ± 0.73	0.51 ± 0.035
GAs5	3.74 ± 0.65	20.75 ± 3.47	9.910 ± 1.72	3.24 ± 0.49	2.87 ± 0.58	6.00 ± 0.86	0.48 ± 0.02
GAs6	3.58 ± 0.45	19.89 ± 2.50	10.00 ± 1.30	3.15 ± 0.80	2.79 ± 0.75	5.29 ± 1.62	0.50 ± 0.03
GAs7	3.30 ± 0.63	18.32 ± 3.50	9.130 ± 1.20	3.03 ± 0.70	2.69 ± 0.81	4.92 ± 1.62	0.50 ± 0.04
GAs8	3.09 ± 1.40	17.18 ± 4.50	8.800 ± 3.20	2.85 ± 1.25	2.52 ± 1.23	4.39 ± 1.86	0.51 ± 0.02
