# Supplementary material for: Utilization of Monosaccharides by <em>Hungateiclostridium thermocellum</em> ATCC 27405 Through Adaptive Evolution
Source: Preprints.org preprint supplement (doi:10.20944/preprints202012.0496.v1), 2020-12-21
Supplement: Supplementary file 14 [file Table S6 Genomic analysis of FAs8 and GAs8.xlsx]

## Sheet: output1
Chrom	Pos	Ref	Alt	varType	Gene	Old locus	Strand	Description	bioType	Effect	HGVSc	CDS_pos	HGVSp	Protein_pos	F9_AD	G9_AD
NC_009012	290742	AAT	A	DEL	CTHE_RS17020	Cthe_0237	-	Response regulator transcription factor	protein_coding	upstream_gene_variant	c.-3527_-3526delAT				205|29	140|18
NC_009012	387223	A	G	SNV	CTHE_RS01605	Cthe_0309	+	Excinuclease ABC subunit, UvrB	protein_coding	missense_variant	c.1205A>G	1205/1983	p.His402Arg	402/660	0|581	0|706
NC_009012	434168	GCTT	G	DEL	CTHE_RS01805	Cthe_0345	-	Putative malate dehydrogenase	protein_coding	disruptive_inframe_deletion	c.896_898delAAG	896/957	p.Glu299del	299/318	0|431	0|469
NC_009012	447029	G	T	SNV	CTHE_RS01860	Cthe_0356	+	IS256-like element ISCth4 family transposase	protein_coding	synonymous_variant	c.366G>T	366/1224	p.Arg122Arg	122/407	-	22|3
NC_009012	484792	A	AT	INS	CTHE_RS02030	Cthe_0390	+	ROK family transcriptional regulator	protein_coding	frameshift_variant&stop_gained	c.48dupT	49/1215	p.Arg17fs	17/404	0|635	0|736
NC_009012	486832	C	CAGATATAATGCTCCCCATTGTCAAGACAGTTTTTTAGCTTTTCTAAGTTAGCTCTCCTTTCTTAATTTTTGGTATCATTATA	INS	CTHE_RS02035	Cthe_0391	+	ATP-binding protein (nbdA)	protein_coding	frameshift_variant&stop_gained	c.558_559insTATAATGCTCCCCATTGTCAAGACAGTTTTTTAGCTTTTCTAAGTTAGCTCTCCTTTCTTAATTTTTGGTATCATTATAAGA	559/1500	p.Asp187fs	187/499	0|130	-
NC_009012	487806	AGG	A	DEL	CTHE_RS02040	Cthe_0392	+	Inner-membrane translocator (msdA)	protein_coding	frameshift_variant	c.19_20delGG	19/1050	p.Gly7fs	7/349	0|799	0|877
NC_009012	621011	G	A	SNV	CTHE_RS02630	Cthe_0509	-	Sodium ion-translocating decarboxylase, beta subunit	protein_coding	missense_variant	c.938C>T	938/1110	p.Ala313Val	313/369	0|613	-
NC_009012	637949	G	A	SNV	CTHE_RS02705	Cthe_0520	-	DUF4391 domain-containing protein	protein_coding	synonymous_variant	c.298C>T	298/726	p.Leu100Leu	100/241	0|290	0|288
NC_009012	671797	C	T	SNV	CTHE_RS02850	Cthe_0550	+	Molecular chaperone HtpG	protein_coding	synonymous_variant	c.765C>T	765/1905	p.Asp255Asp	255/634	0|515	1|539
NC_009012	718595	CGTTTGTATCGTACCTATGAGGAATTGAAACATTGCCGGCGGCAAGTCTGAAGCGCCAAGAATTGACCG	C	DEL	CTHE_RS03015	Cthe_0582	-	Multi-sensor signal transduction histidine kinase PAC	protein_coding	upstream_gene_variant	c.-4238_-4171delCGGTCAATTCTTGGCGCTTCAGACTTGCCGCCGGCAATGTTTCAATTCCTCATAGGTACGATACAAAC				3|205	-
NC_009012	726212	G	A	SNV	CTHE_RS03070		+	IS3-like element IS120 family transposase	protein_coding	missense_variant	c.80G>A	80/1152	p.Ser27Asn	27/383	416|46	-
NC_009012	923235	G	C	SNV	CTHE_RS03925	Cthe_0756	-	Membrane dipeptidase	protein_coding	missense_variant	c.161C>G	161/936	p.Ala54Gly	54/311	0|394	0|450
NC_009012	931486	CTTTTCTGTCAATAATTACAAAATGTTCTTTAAGT	C	DEL	CTHE_RS03980	Cthe_0767	-	16S rRNA processing protein RimM	protein_coding	frameshift_variant	c.234_267delACTTAAAGAACATTTTGTAATTATTGACAGAAAA	234/525	p.Leu79fs	78/174	-	315|344
NC_009012	968778	C	T	SNV	CTHE_RS04150	Cthe_0801	-	IS256 family transposase	protein_coding	missense_variant	c.833G>A	833/1224	p.Gly278Asp	278/407	496|332	451|264
NC_009012	969300	T	C	SNV	CTHE_RS04150	Cthe_0801	-	IS256 family transposase	protein_coding	missense_variant	c.311A>G	311/1224	p.Lys104Arg	104/407	426|47	-
NC_009012	985647	G	A	SNV	CTHE_RS04220	Cthe_0815	-	Arginine repressor, ArgR	protein_coding	missense_variant	c.311C>T	311/462	p.Ala104Val	104/153	152|252	-
NC_009012	1117902	C	T	SNV	CTHE_RS04805	Cthe_0929	-	Stage V sporulation protein S	protein_coding	missense_variant	c.112G>A	112/261	p.Ala38Thr	38/86	163|174	-
NC_009012	1117983	G	A	SNV	CTHE_RS04805	Cthe_0929	-	Stage V sporulation protein S	protein_coding	stop_gained	c.31C>T	31/261	p.Gln11*	11/86	169|101	-
NC_009012	1131741	G	A	SNV	CTHE_RS04880	Cthe_0944	-	Rad50 zinc hook domain protein	protein_coding	stop_gained	c.403C>T	403/1452	p.Gln135*	135/483	1|694	0|762
NC_009012	1221367	G	A	SNV	CTHE_RS05280	Cthe_1020	-	Periplasmic sugar-binding protein (CbpB)	protein_coding	missense_variant	c.275C>T	275/1380	p.Ala92Val	92/459	-	3|313
NC_009012	1266870	G	A	SNV	CTHE_RS05500	Cthe_1060	-	AIR synthase	protein_coding	missense_variant	c.368C>T	368/984	p.Thr123Ile	123/327	-	3|778
NC_009012	1432911	T	C	SNV	CTHE_RS06255	Cthe_1202	-	MFS transporter	protein_coding	missense_variant	c.1027A>G	1027/1176	p.Arg343Gly	343/391	-	1|770
NC_009012	1432956	C	T	SNV	CTHE_RS06255	Cthe_1202	-	MFS transporter	protein_coding	missense_variant	c.982G>A	982/1176	p.Ala328Thr	328/391	-	2|768
NC_009012	1463053	T	C	SNV	CTHE_RS06350	Cthe_1221	-	Glycosyltransferase 36, cellobiose phosphorylase	protein_coding	missense_variant	c.1171A>G	1171/8769	p.Thr391Ala	391/2922	0|789	2|794
NC_009012	1607122	C	T	SNV	CTHE_RS06875	Cthe_1324	-	Heat-inducible transcription repressor HrcA	protein_coding	missense_variant	c.947G>A	947/1056	p.Gly316Asp	316/351	0|936	0|924
NC_009012	1651579	T	G	SNV	CTHE_RS07050	Cthe_1357	-	Glycosyltransferase family 4 protein	protein_coding	missense_variant	c.230A>C	230/1146	p.Gln77Pro	77/381	0|182	1|137
NC_009012	1885605	GAC	G	DEL	CTHE_RS08055	Cthe_1556	-	ABC transporter permease (Phosphate and amino acid transporters)	protein_coding	frameshift_variant	c.111_112delGT	111/711	p.Ser38fs	37/236	-	619|128
NC_009012	1886934	G	A	SNV	CTHE_RS08040	Cthe_1553	-	Flavin reductase domain protein FMN-binding protein	protein_coding	upstream_gene_variant	c.-4198C>T				-	0|345
NC_009012	1886939	T	TCATATATAAATTATATGAA	INS	CTHE_RS08040	Cthe_1553	-	Flavin reductase domain protein FMN-binding protein	protein_coding	upstream_gene_variant	c.-4204_-4203insTTCATATAATTTATATATG				-	0|273
NC_009012	1887296	A	G	SNV	CTHE_RS08065	Cthe_1558	-	Transcriptional regulator, BadM/Rrf2 family	protein_coding	missense_variant	c.185T>C	185/447	p.Val62Ala	62/148	-	0|682
NC_009012	1887423	G	A	SNV	CTHE_RS08065	Cthe_1558	-	Transcriptional regulator, BadM/Rrf2 family	protein_coding	stop_gained	c.58C>T	58/447	p.Gln20*	20/148	-	0|526
NC_009012	2000566	ACTTTATCTGAACGTCAGGATATTCGGCTAAGACTTTTTCTGCAAACATTTTATACAACGGCAATGCCTGCGGTATCTTATCAAAAAACGAAC	A	DEL	CTHE_RS08650		-	DUF998 domain-containing protein	protein_coding	upstream_gene_variant	c.-1872_-1781delGTTCGTTTTTTGATAAGATACCGCAGGCATTGCCGTTGTATAAAATGTTTGCAGAAAAAGTCTTAGCCGAATATCCTGACGTTCAGATAAAG				-	0|101
NC_009012	2014536	T	C	SNV	CTHE_RS08740	Cthe_1690	-	Radical SAM domain protein	protein_coding	missense_variant	c.625A>G	625/993	p.Lys209Glu	209/330	0|633	1|602
NC_009012	2096289	A	G	SNV	CTHE_RS09180	Cthe_1773	-	Peptidase S16, lon-like protein	protein_coding	synonymous_variant	c.321T>C	321/2445	p.Pro107Pro	107/814	2|1004	1|827
NC_009012	2226232	A	T	SNV	CTHE_RS09725	Cthe_1874	-	Transposase, mutator type	protein_coding	missense_variant	c.675T>A	675/1224	p.Asn225Lys	225/407	-	7|5
NC_009012	2254707	A	G	SNV	CTHE_RS09870	Cthe_1901	+	Transposase, mutator type	protein_coding	synonymous_variant	c.1137A>G	1137/1224	p.Val379Val	379/407	133|19	-
NC_009012	2371016	T	C	SNV	CTHE_RS16965		-	Hypothetical protein	protein_coding	missense_variant	c.365A>G	365/1675	p.Lys122Arg	122/557	1052|341	760|209
NC_009012	2371128	T	C	SNV	CTHE_RS16965		-	Hypothetical protein	protein_coding	missense_variant	c.253A>G	253/1675	p.Ile85Val	85/557	1197|715	797|527
NC_009012	2371354	C	T	SNV	CTHE_RS16965		-	Hypothetical protein	protein_coding	synonymous_variant	c.27G>A	27/1675	p.Gly9Gly	9/557	1276|1184	1059|1038
NC_009012	2371526	AGCC	A	DEL	CTHE_RS10330		-	Hypothetical protein	protein_coding	disruptive_inframe_deletion	c.342_344delGGC	342/348	p.Ala115del	114/115	823|718	773|721
NC_009012	2397129	T	C	SNV	CTHE_RS10470		-	DUF1910 domain-containing protein	protein_coding	missense_variant	c.566A>G	566/1236	p.Glu189Gly	189/411	891|66	740|57
NC_009012	2397134	A	G	SNV	CTHE_RS10470		-	DUF1910 domain-containing protein	protein_coding	synonymous_variant	c.561T>C	561/1236	p.Tyr187Tyr	187/411	-	749|60
NC_009012	2397152	A	T	SNV	CTHE_RS10470		-	DUF1910 domain-containing protein	protein_coding	synonymous_variant	c.543T>A	543/1236	p.Ser181Ser	181/411	894|82	751|80
NC_009012	2397201	A	G	SNV	CTHE_RS10470		-	DUF1910 domain-containing protein	protein_coding	missense_variant	c.494T>C	494/1236	p.Val165Ala	165/411	901|148	774|127
NC_009012	2397277	A	G	SNV	CTHE_RS10470		-	DUF1910 domain-containing protein	protein_coding	synonymous_variant	c.418T>C	418/1236	p.Leu140Leu	140/411	925|197	806|162
NC_009012	2397410	T	C	SNV	CTHE_RS10470		-	DUF1910 domain-containing protein	protein_coding	synonymous_variant	c.285A>G	285/1236	p.Glu95Glu	95/411	-	816|381
NC_009012	2397467	A	G	SNV	CTHE_RS10470		-	DUF1910 domain-containing protein	protein_coding	synonymous_variant	c.228T>C	228/1236	p.Pro76Pro	76/411	-	795|503
NC_009012	2397503	A	G	SNV	CTHE_RS10470		-	DUF1910 domain-containing protein	protein_coding	synonymous_variant	c.192T>C	192/1236	p.Asn64Asn	64/411	-	778|551
NC_009012	2397505	T	C	SNV	CTHE_RS10470		-	DUF1910 domain-containing protein	protein_coding	missense_variant	c.190A>G	190/1236	p.Asn64Asp	64/411	-	783|550
NC_009012	2397509	G	A	SNV	CTHE_RS10470		-	DUF1910 domain-containing protein	protein_coding	synonymous_variant	c.186C>T	186/1236	p.Gly62Gly	62/411	-	775|545
NC_009012	2397516	A	C	SNV	CTHE_RS10470		-	DUF1910 domain-containing protein	protein_coding	missense_variant	c.179T>G	179/1236	p.Met60Arg	60/411	-	769|544
NC_009012	2397524	T	G	SNV	CTHE_RS10470		-	DUF1910 domain-containing protein	protein_coding	missense_variant	c.171A>C	171/1236	p.Gln57His	57/411	-	774|542
NC_009012	2397526	G	C	SNV	CTHE_RS10470		-	DUF1910 domain-containing protein	protein_coding	missense_variant	c.169C>G	169/1236	p.Gln57Glu	57/411	-	776|540
NC_009012	2397529	A	C	SNV	CTHE_RS10470		-	DUF1910 domain-containing protein	protein_coding	missense_variant	c.166T>G	166/1236	p.Ser56Ala	56/411	-	769|538
NC_009012	2397551	T	C	SNV	CTHE_RS10470		-	DUF1910 domain-containing protein	protein_coding	synonymous_variant	c.144A>G	144/1236	p.Gln48Gln	48/411	-	755|532
NC_009012	2397554	G	A	SNV	CTHE_RS10470		-	DUF1910 domain-containing protein	protein_coding	synonymous_variant	c.141C>T	141/1236	p.Asn47Asn	47/411	-	752|530
NC_009012	2527218	G	C	SNV	CTHE_RS11050	Cthe_2128	-	Sugar-binding periplasmic protein (CbpC)	protein_coding	missense_variant	c.1063C>G	1063/1383	p.Gln355Glu	355/460	0|459	0|404
NC_009012	2572905	G	A	SNV	CTHE_RS11215	Cthe_2159	-	Carbohydrate-binding domain-containing protein	protein_coding	upstream_gene_variant	c.-4467C>T				0|352	0|347
NC_009012	2661872	A	G	SNV	CTHE_RS11620	Cthe_2234	-	Hypothetical protein	protein_coding	synonymous_variant	c.307T>C	307/384	p.Leu103Leu	103/127	0|409	0|421
NC_009012	2710436	G	A	SNV	CTHE_RS11850	Cthe_2279	+	Polar amino acid ABC transporter, inner membrane subunit	protein_coding	missense_variant	c.410G>A	410/711	p.Gly137Asp	137/236	0|879	2|923
NC_009012	2722280	T	TACATTAATAAAGTGAAAAATCGACATATTAGAAATACTGAGTTAGTGTTTATATAA	INS	CTHE_RS11870	Cthe_2283	-	Methyl-accepting chemotaxis sensory transducer	protein_coding	upstream_gene_variant	c.-4225_-4224insTTATATAAACACTAACTCAGTATTTCTAATATGTCGATTTTTCACTTTATTAATGT				340|40	-
NC_009012	2733993	CTTATTTCAATTCCTCATAGGTACGATAAAAACGCAACTTGCGTCCAGCAGATACCATAGAGTATAT	C	DEL	CTHE_RS11930	Cthe_2295	+	IstB domain protein ATP-binding protein	protein_coding	downstream_gene_variant	c.*4973_*5038delTTATTTCAATTCCTCATAGGTACGATAAAAACGCAACTTGCGTCCAGCAGATACCATAGAGTATAT				23|136	-
NC_009012	2786429	C	A	SNV	CTHE_RS12165	Cthe_2337	-	Hypothetical protein	protein_coding	missense_variant	c.1033G>T	1033/1314	p.Gly345Cys	345/437	2|509	0|343
NC_009012	2898068	T	A	SNV	CTHE_RS12625	Cthe_2422	-	DUF5050 domain-containing protein	protein_coding	upstream_gene_variant	c.-4478A>T				0|579	0|523
NC_009012	2911490	GC	G	DEL	CTHE_RS12715	Cthe_2441	-	DeoR/GlpR transcriptional regulator	protein_coding	frameshift_variant	c.574delG	574/804	p.Ala192fs	192/267	0|824	-
NC_009012	2918490	C	T	SNV	CTHE_RS12745	Cthe_2447	+	ATP-binding protein (nbdD)	protein_coding	stop_gained	c.442C>T	442/1488	p.Gln148*	148/495	1|1195	-
NC_009012	3006138	T	A	SNV	CTHE_RS13240	Cthe_2536	+	Sulfate adenylyltransferase subunit 2	protein_coding	missense_variant	c.596T>A	596/882	p.Ile199Lys	199/293	0|1260	0|1163
NC_009012	3064801	C	T	SNV	CTHE_RS13530	Cthe_2592	+	DUF2752 domain-containing protein	protein_coding	synonymous_variant	c.216C>T	216/468	p.Ser72Ser	72/155	-	0|899
NC_009012	3073025	C	T	SNV	CTHE_RS13580	Cthe_2602	+	F0F1 ATP synthase subunit A	protein_coding	upstream_gene_variant	c.-127C>T				0|836	1|449
NC_009012	3151666	T	C	SNV	CTHE_RS13935	Cthe_2671	-	Transposase mutator type	protein_coding	synonymous_variant	c.1137A>G	1137/1224	p.Val379Val	379/407	145|13	153|17
NC_009012	3185043	T	C	SNV	CTHE_RS14095		+	Ribbon-helix-helix protein%2C CopG family	protein_coding	stop_lost	c.175T>C	175/288	p.Ter59Glnext*?	59/95	0|1090	0|954
NC_009012	3315609	C	T	SNV	CTHE_RS14645	Cthe_2810	+	Na/Pi cotransporter family protein	protein_coding	missense_variant	c.766C>T	766/1755	p.His256Tyr	256/584	-	0|1060
NC_009012	3315729	C	T	SNV	CTHE_RS14645	Cthe_2810	+	Na/Pi cotransporter family protein	protein_coding	missense_variant	c.886C>T	886/1755	p.His296Tyr	296/584	2|790	-
NC_009012	3327478	ATT	A	DEL	CTHE_RS14670	Cthe_2815	-	Lysine--tRNA ligase	protein_coding	upstream_gene_variant	c.-1828_-1827delAA				-	141|26
NC_009012	3327482	A	AAT	INS	CTHE_RS14670	Cthe_2815	-	Lysine--tRNA ligase	protein_coding	upstream_gene_variant	c.-1831_-1830insAT				-	139|25
NC_009012	3327486	A	AC	INS	CTHE_RS14670	Cthe_2815	-	Lysine--tRNA ligase	protein_coding	upstream_gene_variant	c.-1835_-1834insG				-	135|22
NC_009012	3327488	T	TC	INS	CTHE_RS14670	Cthe_2815	-	Lysine--tRNA ligase	protein_coding	upstream_gene_variant	c.-1837_-1836insG				-	134|22
NC_009012	3327490	AAAGC	A	DEL	CTHE_RS14670	Cthe_2815	-	Lysine--tRNA ligase	protein_coding	upstream_gene_variant	c.-1842_-1839delGCTT				-	133|20
NC_009012	3327495	C	CGCAATA	INS	CTHE_RS14670	Cthe_2815	-	Lysine--tRNA ligase	protein_coding	upstream_gene_variant	c.-1844_-1843insTATTGC				-	131|20
NC_009012	3327500	TA	T	DEL	CTHE_RS14670	Cthe_2815	-	Lysine--tRNA ligase	protein_coding	upstream_gene_variant	c.-1849delT				-	132|11
NC_009012	3327503	TCAAAAGA	T	DEL	CTHE_RS14670	Cthe_2815	-	Lysine--tRNA ligase	protein_coding	upstream_gene_variant	c.-1858_-1852delTCTTTTG				-	131|11
NC_009012	3327513	CAACA	C	DEL	CTHE_RS14670	Cthe_2815	-	Lysine--tRNA ligase	protein_coding	upstream_gene_variant	c.-1865_-1862delTGTT				-	130|11
NC_009012	3327519	TAATA	T	DEL	CTHE_RS14670	Cthe_2815	-	Lysine--tRNA ligase	protein_coding	upstream_gene_variant	c.-1871_-1868delTATT				-	125|11
NC_009012	3342481	T	C	SNV	CTHE_RS14720	Cthe_2825	+	Hypothetical protein	protein_coding	synonymous_variant	c.1536T>C	1536/1848	p.Asp512Asp	512/615	1037|207	949|172
NC_009012	3342484	G	T	SNV	CTHE_RS14720	Cthe_2825	+	Hypothetical protein	protein_coding	synonymous_variant	c.1539G>T	1539/1848	p.Gly513Gly	513/615	1045|220	952|177
NC_009012	3342496	T	C	SNV	CTHE_RS14720	Cthe_2825	+	Hypothetical protein	protein_coding	synonymous_variant	c.1551T>C	1551/1848	p.Asn517Asn	517/615	1044|266	931|217
NC_009012	3342506	G	A	SNV	CTHE_RS14720	Cthe_2825	+	Hypothetical protein	protein_coding	missense_variant	c.1561G>A	1561/1848	p.Asp521Asn	521/615	1045|297	933|241
NC_009012	3342508	C	T	SNV	CTHE_RS14720	Cthe_2825	+	Hypothetical protein	protein_coding	synonymous_variant	c.1563C>T	1563/1848	p.Asp521Asp	521/615	1044|302	931|250
NC_009012	3342515	G	A	SNV	CTHE_RS14720	Cthe_2825	+	Hypothetical protein	protein_coding	missense_variant	c.1570G>A	1570/1848	p.Val524Ile	524/615	1036|326	936|276
NC_009012	3342526	A	G	SNV	CTHE_RS14720	Cthe_2825	+	Hypothetical protein	protein_coding	synonymous_variant	c.1581A>G	1581/1848	p.Val527Val	527/615	1030|375	954|311
NC_009012	3342535	G	A	SNV	CTHE_RS14720	Cthe_2825	+	Hypothetical protein	protein_coding	synonymous_variant	c.1590G>A	1590/1848	p.Glu530Glu	530/615	1028|405	958|330
NC_009012	3342538	G	C	SNV	CTHE_RS14720	Cthe_2825	+	Hypothetical protein	protein_coding	synonymous_variant	c.1593G>C	1593/1848	p.Ala531Ala	531/615	1030|414	956|336
NC_009012	3342553	G	A	SNV	CTHE_RS14720	Cthe_2825	+	Hypothetical protein	protein_coding	synonymous_variant	c.1608G>A	1608/1848	p.Ala536Ala	536/615	1010|459	936|392
NC_009012	3342559	T	G	SNV	CTHE_RS14720	Cthe_2825	+	Hypothetical protein	protein_coding	synonymous_variant	c.1614T>G	1614/1848	p.Leu538Leu	538/615	1006|482	927|406
NC_009012	3342563	A	G	SNV	CTHE_RS14720	Cthe_2825	+	Hypothetical protein	protein_coding	missense_variant	c.1618A>G	1618/1848	p.Thr540Ala	540/615	1013|488	932|418
NC_009012	3342592	G	A	SNV	CTHE_RS14720	Cthe_2825	+	Hypothetical protein	protein_coding	synonymous_variant	c.1647G>A	1647/1848	p.Ser549Ser	549/615	986|566	919|484
NC_009012	3342604	G	A	SNV	CTHE_RS14720	Cthe_2825	+	Hypothetical protein	protein_coding	synonymous_variant	c.1659G>A	1659/1848	p.Leu553Leu	553/615	984|570	925|491
NC_009012	3342606	T	A	SNV	CTHE_RS14720	Cthe_2825	+	Hypothetical protein	protein_coding	missense_variant	c.1661T>A	1661/1848	p.Ile554Lys	554/615	980|570	927|493
NC_009012	3342607	A	G	SNV	CTHE_RS14720	Cthe_2825	+	Hypothetical protein	protein_coding	missense_variant	c.1662A>G	1662/1848	p.Ile554Met	554/615	979|576	927|492
NC_009012	3342612	A	T	SNV	CTHE_RS14720	Cthe_2825	+	Hypothetical protein	protein_coding	missense_variant	c.1667A>T	1667/1848	p.Asp556Val	556/615	989|576	921|496
NC_009012	3342615	A	G	SNV	CTHE_RS14720	Cthe_2825	+	Hypothetical protein	protein_coding	missense_variant	c.1670A>G	1670/1848	p.Lys557Arg	557/615	989|578	927|498
NC_009012	3342617	A	T	SNV	CTHE_RS14720	Cthe_2825	+	Hypothetical protein	protein_coding	missense_variant	c.1672A>T	1672/1848	p.Thr558Ser	558/615	987|582	929|498
NC_009012	3342622	T	G	SNV	CTHE_RS14720	Cthe_2825	+	Hypothetical protein	protein_coding	synonymous_variant	c.1677T>G	1677/1848	p.Gly559Gly	559/615	984|584	930|506
NC_009012	3342623	A	G	SNV	CTHE_RS14720	Cthe_2825	+	Hypothetical protein	protein_coding	missense_variant	c.1678A>G	1678/1848	p.Asn560Asp	560/615	991|583	932|507
NC_009012	3342626	G	A	SNV	CTHE_RS14720	Cthe_2825	+	Hypothetical protein	protein_coding	missense_variant	c.1681G>A	1681/1848	p.Asp561Asn	561/615	982|595	926|518
NC_009012	3342638	G	A	SNV	CTHE_RS14720	Cthe_2825	+	Hypothetical protein	protein_coding	missense_variant	c.1693G>A	1693/1848	p.Glu565Lys	565/615	981|660	922|558
NC_009012	3342959	A	G	SNV	CTHE_RS14725	Cthe_2826	+	DUF1911 domain-containing protein	protein_coding	synonymous_variant	c.144A>G	144/1239	p.Gln48Gln	48/412	1005|539	-
NC_009012	3342972	G	A	SNV	CTHE_RS14725	Cthe_2826	+	DUF1911 domain-containing protein	protein_coding	missense_variant	c.157G>A	157/1239	p.Gly53Ser	53/412	1012|107	-
NC_009012	3342973	G	T	SNV	CTHE_RS14725	Cthe_2826	+	DUF1911 domain-containing protein	protein_coding	missense_variant	c.158G>T	158/1239	p.Gly53Val	53/412	1012|104	-
NC_009012	3342977	A	G	SNV	CTHE_RS14725	Cthe_2826	+	DUF1911 domain-containing protein	protein_coding	synonymous_variant	c.162A>G	162/1239	p.Thr54Thr	54/412	1016|96	-
NC_009012	3342980	T	TGCTG	INS	CTHE_RS14725	Cthe_2826	+	DUF1911 domain-containing protein	protein_coding	frameshift_variant	c.165_166insGCTG	166/1239	p.Lys56fs	56/412	1015|90	-
NC_009012	3342981	AAATT	A	DEL	CTHE_RS14725	Cthe_2826	+	DUF1911 domain-containing protein	protein_coding	frameshift_variant	c.170_173delTAAT	170/1239	p.Leu57fs	57/412	1025|82	-
NC_009012	3342986	A	C	SNV	CTHE_RS14725	Cthe_2826	+	DUF1911 domain-containing protein	protein_coding	missense_variant	c.171A>C	171/1239	p.Leu57Phe	57/412	1015|80	-
NC_009012	3343508	A	G	SNV	CTHE_RS14725	Cthe_2826	+	DUF1911 domain-containing protein	protein_coding	synonymous_variant	c.693A>G	693/1239	p.Ala231Ala	231/412	-	705|60
NC_009012	3343509	C	T	SNV	CTHE_RS14725	Cthe_2826	+	DUF1911 domain-containing protein	protein_coding	synonymous_variant	c.694C>T	694/1239	p.Leu232Leu	232/412	-	703|61
NC_009012	3343511	G	A	SNV	CTHE_RS14725	Cthe_2826	+	DUF1911 domain-containing protein	protein_coding	synonymous_variant	c.696G>A	696/1239	p.Leu232Leu	232/412	-	708|67
NC_009012	3343515	A	G	SNV	CTHE_RS14725	Cthe_2826	+	DUF1911 domain-containing protein	protein_coding	missense_variant	c.700A>G	700/1239	p.Asn234Asp	234/412	-	708|73
NC_009012	3343553	G	A	SNV	CTHE_RS14725	Cthe_2826	+	DUF1911 domain-containing protein	protein_coding	synonymous_variant	c.738G>A	738/1239	p.Lys246Lys	246/412	889|124	703|112
NC_009012	3343556	G	T	SNV	CTHE_RS14725	Cthe_2826	+	DUF1911 domain-containing protein	protein_coding	missense_variant	c.741G>T	741/1239	p.Lys247Asn	247/412	884|139	703|119
NC_009012	3348886	T	C	SNV	CTHE_RS14755		-	IS256 family transposase	protein_coding	missense_variant	c.311A>G	311/798	p.Lys104Arg	104/265	56|26	33|24
NC_009012	3351212	G	C	SNV	CTHE_RS14765		+	Hypothetical protein	protein_coding	synonymous_variant	c.1041G>C	1041/1341	p.Ala347Ala	347/446	704|235	611|210
NC_009012	3351215	A	G	SNV	CTHE_RS14765		+	Hypothetical protein	protein_coding	synonymous_variant	c.1044A>G	1044/1341	p.Glu348Glu	348/446	693|240	601|212
NC_009012	3351317	A	T	SNV	CTHE_RS14765		+	Hypothetical protein	protein_coding	synonymous_variant	c.1146A>T	1146/1341	p.Val382Val	382/446	520|282	503|269
NC_009012	3351379	G	A	SNV	CTHE_RS14765		+	Hypothetical protein	protein_coding	missense_variant	c.1208G>A	1208/1341	p.Arg403Lys	403/446	659|132	674|118
NC_009012	3351416	A	G	SNV	CTHE_RS14765		+	Hypothetical protein	protein_coding	synonymous_variant	c.1245A>G	1245/1341	p.Glu415Glu	415/446	788|68	-
NC_009012	3360873	C	T	SNV	CTHE_RS17510		+	Hypothetical protein	protein_coding	synonymous_variant	c.834C>T	834/1632	p.Phe278Phe	278/543	1163|451	1150|398
NC_009012	3361185	T	A	SNV	CTHE_RS17510		+	Hypothetical protein	protein_coding	synonymous_variant	c.1146T>A	1146/1632	p.Val382Val	382/543	1256|534	1205|464
NC_009012	3372412	T	G	SNV	CTHE_RS14870	Cthe_2854	+	Hypothetical protein	protein_coding	synonymous_variant	c.1023T>G	1023/1848	p.Pro341Pro	341/615	1012|150	963|106
NC_009012	3372415	A	G	SNV	CTHE_RS14870	Cthe_2854	+	Hypothetical protein	protein_coding	synonymous_variant	c.1026A>G	1026/1848	p.Glu342Glu	342/615	1011|156	963|109
NC_009012	3372463	G	A	SNV	CTHE_RS14870	Cthe_2854	+	Hypothetical protein	protein_coding	synonymous_variant	c.1074G>A	1074/1848	p.Glu358Glu	358/615	992|242	937|181
NC_009012	3372535	A	T	SNV	CTHE_RS14870	Cthe_2854	+	Hypothetical protein	protein_coding	synonymous_variant	c.1146A>T	1146/1848	p.Val382Val	382/615	1026|421	903|353
NC_009012	3373488	T	C	SNV	CTHE_RS14875	Cthe_2855	+	DUF1911 domain-containing protein	protein_coding	synonymous_variant	c.228T>C	228/1239	p.Pro76Pro	76/412	-	716|74
NC_009012	3373545	A	G	SNV	CTHE_RS14875	Cthe_2855	+	DUF1911 domain-containing protein	protein_coding	synonymous_variant	c.285A>G	285/1239	p.Glu95Glu	95/412	957|119	770|169
NC_009012	3373687	T	G	SNV	CTHE_RS14875	Cthe_2855	+	DUF1911 domain-containing protein	protein_coding	missense_variant	c.427T>G	427/1239	p.Ser143Ala	143/412	1008|457	878|483
NC_009012	3373689	C	T	SNV	CTHE_RS14875	Cthe_2855	+	DUF1911 domain-containing protein	protein_coding	synonymous_variant	c.429C>T	429/1239	p.Ser143Ser	143/412	1006|463	875|482
NC_009012	3373707	T	C	SNV	CTHE_RS14875	Cthe_2855	+	DUF1911 domain-containing protein	protein_coding	synonymous_variant	c.447T>C	447/1239	p.Asn149Asn	149/412	986|506	873|530
NC_009012	3373938	A	G	SNV	CTHE_RS14875	Cthe_2855	+	DUF1911 domain-containing protein	protein_coding	synonymous_variant	c.678A>G	678/1239	p.Gly226Gly	226/412	922|764	851|678
NC_009012	3373944	T	C	SNV	CTHE_RS14875	Cthe_2855	+	DUF1911 domain-containing protein	protein_coding	synonymous_variant	c.684T>C	684/1239	p.Asp228Asp	228/412	935|750	850|672
NC_009012	3374106	A	G	SNV	CTHE_RS14875	Cthe_2855	+	DUF1911 domain-containing protein	protein_coding	synonymous_variant	c.846A>G	846/1239	p.Arg282Arg	282/412	861|406	761|355
NC_009012	3374120	G	A	SNV	CTHE_RS14875	Cthe_2855	+	DUF1911 domain-containing protein	protein_coding	missense_variant	c.860G>A	860/1239	p.Arg287Lys	287/412	880|367	755|294
NC_009012	3374121	A	G	SNV	CTHE_RS14875	Cthe_2855	+	DUF1911 domain-containing protein	protein_coding	synonymous_variant	c.861A>G	861/1239	p.Arg287Arg	287/412	879|365	754|292
NC_009012	3374124	C	T	SNV	CTHE_RS14875	Cthe_2855	+	DUF1911 domain-containing protein	protein_coding	synonymous_variant	c.864C>T	864/1239	p.Phe288Phe	288/412	874|358	752|286
NC_009012	3375948	A	G	SNV	CTHE_RS14895		+	Hypothetical protein	protein_coding	upstream_gene_variant	c.-1752A>G				843|222	800|246
NC_009012	3375953	T	G	SNV	CTHE_RS14895		+	Hypothetical protein	protein_coding	upstream_gene_variant	c.-1747T>G				860|211	813|231
NC_009012	3376078	C	T	SNV	CTHE_RS14890		-	IS256-like element ISCth4 family transposase	protein_coding	synonymous_variant	c.1137G>A	1137/1224	p.Val379Val	379/407	820|217	805|241
NC_009012	3376540	A	T	SNV	CTHE_RS14890		-	IS256-like element ISCth4 family transposase	protein_coding	missense_variant	c.675T>A	675/1224	p.Asn225Lys	225/407	19|7	18|6
NC_009012	3425860	T	A	SNV	CTHE_RS15115	Cthe_2900	+	SigB/SigF/SigG family RNA polymerase sigma factor	protein_coding	missense_variant	c.145T>A	145/759	p.Phe49Ile	49/252	0|769	0|592
NC_009012	3630631	A	G	SNV	CTHE_RS16990	Cthe_3078	+	Cellulosome anchoring protein cohesin region, OlpB	protein_coding	synonymous_variant	c.5403A>G	5403/6942	p.Pro1801Pro	1801/2313	96|22	-
NC_009012	3642851	G	A	SNV	CTHE_RS16100	Cthe_3087	+	Sporulation transcriptional activator Spo0A	protein_coding	missense_variant	c.538G>A	538/810	p.Ala180Thr	180/269	1|829	0|885
NC_009012	3643399	G	GT	INS	CTHE_RS17385		-	Integration host factor subunit alpha	protein_coding	frameshift_variant	c.58dupA	58/275	p.Thr20fs	20/90	0|780	0|736
NC_009012	3667566	C	T	SNV	CTHE_RS16265	Cthe_3110	+	UBA/THIF-type NAD/FAD binding protein	protein_coding	upstream_gene_variant	c.-3387C>T				10|231	3|196
NC_009012	3708075	C	T	SNV	CTHE_RS16395		-	S8 family serine peptidase	protein_coding	upstream_gene_variant	c.-914G>A				-	232|227
NC_009012	3726607	G	A	SNV	CTHE_RS16480	Cthe_3154	+	ECF transporter S component	protein_coding	missense_variant	c.449G>A	449/552	p.Gly150Asp	150/183	-	696|202
NC_009012	3739064	T	A	SNV	CTHE_RS16530	Cthe_3164	+	Two component transcriptional regulator, AraC family	protein_coding	stop_gained	c.680T>A	680/1635	p.Leu227*	227/544	0|571	0|701
NC_009012	3741804	G	C	SNV	CTHE_RS16540	Cthe_3166	+	Glucose-1-phosphate adenylyltransferase	protein_coding	missense_variant	c.250G>C	250/1281	p.Gly84Arg	84/426	0|529	0|540
NC_009012	3752689	C	G	SNV	CTHE_RS16590	Cthe_3175	-	DUF421 domain-containing protein	protein_coding	missense_variant	c.517G>C	517/684	p.Asp173His	173/227	0|646	1|728
NC_009012	3805543	A	T	SNV	CTHE_RS16775	Cthe_3212	+	Hypothetical protein	protein_coding	missense_variant	c.761A>T	761/1332	p.Glu254Val	254/443	1|282	1|219
NC_009012	3833351	T	C	SNV	CTHE_RS16880		+	Hypothetical protein	protein_coding	missense_variant	c.820T>C	820/4965	p.Trp274Arg	274/1654	0|441	0|407
