# Supplementary material for: Utilization of Monosaccharides by <em>Hungateiclostridium thermocellum</em> ATCC 27405 Through Adaptive Evolution
Source: Preprints.org preprint supplement (doi:10.20944/preprints202012.0496.v1), 2020-12-21
Supplement: Supplementary file 15 [file Table S7 Raw counts of RNA-seq (CGs1, FAs1, GAs1).xlsx]

## Sheet: 1 (raw count) (2 rep)
id	gene	length	c5_1	c5_2	f10_1	f10_2	g10_1	g10_2	protein
1	Cthe_0001	1620	3639	3774	4234	4528	2473	2630	"Recombinase family protein"
2	Cthe_0002	720	110	145	67	71	24	28	"Hypothetical protein"
3	Cthe_0003	930	624	714	819	877	835	892	"Ankyrin repeat-containing protein"
4	Cthe_0004	5829	570	599	275	300	544	566	"YD repeat-containing protein"
5	Cthe_0005	858	185	216	273	301	130	146	"Hypothetical protein"
6	Cthe_0006	393	8	12	24	28	14	17	"Hypothetical protein"
7	Cthe_0007	534	271	289	465	486	273	299	"Hypothetical protein"
8	Cthe_0008	303	150	136	124	150	94	78	"Hypothetical protein"
9	Cthe_0009	5523	4754	4822	2092	2344	2215	2136	"YD repeat-containing protein"
10	Cthe_0010	378	30	25	66	78	19	30	"Hypothetical protein"
11	Cthe_0015	2124	1321	1238	1647	1755	756	720	"Alpha-L-arabinofuranosidase B"
12	Cthe_0016	480	2257	2369	23849	24349	10300	11303	"Ferritin Dps family protein"
13	Cthe_0017	1863	6950	6789	13721	14800	10812	11226	"DUF1538 domain-containing protein"
14	Cthe_0018	315	1637	1522	1373	1444	4208	4278	"Hypothetical protein"
15	Cthe_0019	327	3110	3080	3385	3566	3592	3848	"Nitrogen regulatory protein P-II"
16	Cthe_0020	963	182	169	185	201	699	802	"Biotin synthase BioB"
17	Cthe_0021	735	20	24	102	120	97	88	"Dethiobiotin synthase"
18	Cthe_0022	1167	49	43	229	291	239	263	"8-amino-7-oxononanoate synthase"
19	Cthe_0023	777	137	129	199	180	251	230	"Carboxylesterase"
20	Cthe_0024	852	93	86	323	355	281	245	"Biotin biosynthesis protein BioC"
21	Cthe_0025	1374	72	67	147	163	133	150	"Adenosylmethionine-8-amino-7-oxononanoate aminotransferase"
22	Cthe_0028	1011	139	125	396	421	241	288	"Nucleotidyltransferase"
23	Cthe_0029	639	272	289	517	611	389	421	"GyrI-like domain-containing protein"
24	Cthe_0030	711	120	136	128	105	188	177	"Phosphatidate cytidylyltransferase"
25	Cthe_0031	624	126	117	179	201	146	166	"Cation transporter"
26	Cthe_0032	1773	2821	2977	3328	3377	1211	1320	"Dockerin type 1 cellulosome, beta-mannanase"
27	Cthe_0033	2667	3094	3033	2759	2835	1939	2111	"Translation elongation factor EF-G (GTPases)"
28	Cthe_0034	660	158	130	479	495	239	277	"Crp/Fnr family transcriptional regulator"
29	Cthe_0035	705	47	40	146	167	92	112	"4Fe-4S dicluster-containing protein"
30	Cthe_0036	1629	79	88	117	148	57	65	"Hydroxylamine reductase"
31	Cthe_0037	429	4	7	10	14	12	16	"Hsp20/alpha crystallin family protein"
32	Cthe_0038	258	7	10	7	11	1	3	"Chemotaxis protein cheW"
33	Cthe_0039	1872	56	63	66	80	59	66	"Methyl-accepting chemotaxis sensory transducer"
34	Cthe_0040	2664	2480	2542	4700	4804	2049	2233	"Glycoside hydrolase family 9, endo-beta-1,4-glucanase I"
35	Cthe_0042	1203	4299	4155	2427	2341	2788	2455	"Small GTP-binding protein"
36	Cthe_0043	2229	2677	2712	10605	9872	3941	3658	"Glycoside hydrolase family 9, endoglucanase N"
37	Cthe_0044	1602	1235	1335	1624	1734	275	306	"CotH kinase family protein"
38	Cthe_0045	810	1230	1259	340	378	1255	1332	"Copper amine oxidase N-terminal domain-containing protein"
39	Cthe_0046	2703	3759	3614	2794	2940	2090	2234	"Hypothetical protein"
40	Cthe_0047	810	185	210	70	85	135	156	"Copper amine oxidase-like domain-containing protein"
41	Cthe_0048	810	124	113	52	46	71	64	"Copper amine oxidase-like domain-containing protein"
42	Cthe_0049	663	323	378	220	233	44	52	"XRE family transcriptional regulator"
43	Cthe_0050	960	174	159	132	145	182	195	"Hypothetical protein"
44	Cthe_0051	1260	51	63	87	99	81	87	"Putative glycoside hydrolase"
45	Cthe_0052	1260	4716	4802	8358	8972	1212	1324	"Putative glycoside hydrolase"
46	Cthe_0053	2385	11698	12298	29345	30564	41641	42236	"Ribonucleotide-diphosphate reductase subunit alpha"
47	Cthe_0054	2190	2194	2300	2924	3020	7704	7984	"Family 10 glycosyl hydrolase"
48	Cthe_0055	537	134	115	252	230	542	623	"Hypothetical protein"
49	Cthe_0056	13893	12236	12668	13079	13569	9452	9241	"Bacterial surface proteins containing Ig-like domains"
50	Cthe_0057	633	3	5	40	45	4	6	"DUF3298 and DUF4163 domain-containing protein"
51	Cthe_0058	771	7117	7450	6649	6742	1617	1688	"RNA polymerase sigma-I factor, SigI1"
52	Cthe_0059	1461	5859	6005	8305	8473	1080	987	"Type 3a cellulose-binding domain protein, RsgI1"
53	Cthe_0060	504	5634	5782	3786	3642	2495	2349	"SEC-C motif domain protein"
54	Cthe_0061	549	3822	3890	5020	5120	2176	2309	"Biotin transporter BioY"
55	Cthe_0062	1890	340	377	2044	2223	368	388	"Lipoteichoic acid synthase"
56	Cthe_0063	336	554	526	1180	1239	1285	1341	"Rubredoxin-type Fe(Cys)4 protein"
57	Cthe_0064	957	2561	2483	9404	10087	6691	6402	"Na/Pi-cotransporter family protein"
58	Cthe_0065	339	57	50	159	140	369	317	"Hypothetical protein"
59	Cthe_0066	477	72	48	324	230	537	430	"Hypothetical protein"
60	Cthe_0067	726	3697	3766	9754	11236	6935	6874	"NAD-dependent protein deacetylase"
61	Cthe_0068	612	6945	7233	9985	9763	4399	4132	"Peptidylprolyl isomerase"
62	Cthe_0069	1023	6353	6115	7871	8000	3770	3434	"Asparagine synthetase AsnA"
63	Cthe_0070	1395	6977	6741	6551	6880	5565	5237	"Asparaginyl-tRNA synthetase"
64	Cthe_0071	2817	3649	3533	6910	7003	7426	7603	"Endo-β-1,4-glucanase Y, CelY"
65	Cthe_0072	486	664	721	2790	2855	537	623	"Phage shock protein C, PspC"
66	Cthe_0073	966	3604	3823	5016	5122	2130	2234	"Hypothetical protein"
67	Cthe_0075	744	1124	1348	530	589	2176	2457	"Hypothetical protein"
68	Cthe_0076	390	6266	6140	10316	8978	2176	2010	"YtxH domain-containing protein"
69	Cthe_0077	384	6169	5846	5366	5249	4260	4112	"Hypothetical protein"
70	Cthe_0079	516	868	888	5203	6300	2116	2444	"Hypothetical protein"
71	Cthe_0080	432	669	720	6044	5871	1758	1640	"Chemotaxis signal transduction protein CheW"
72	Cthe_0081	1206	1771	1588	3040	3220	1296	1430	"Bifunctional glutamate N-acetyltransferase/amino-acid acetyl transferase ArgJ"
73	Cthe_0082	2448	5488	5231	7645	7788	3684	3785	"Endopeptidase La"
74	Cthe_0083	1680	522	503	1819	2001	459	523	"SpoIIE family protein phosphatase"
75	Cthe_0084	546	2283	2386	11657	10238	3816	3642	"Hypothetical protein"
76	Cthe_0085	633	13404	12890	51929	48233	26773	25678	"Negative regulator of genetic competence, sporulation and motility"
77	Cthe_0086	885	119	213	39	21	155	102	"Hypothetical protein"
78	Cthe_0087	603	1727	1645	1433	1331	1118	1267	"Maf-like protein"
79	Cthe_0088	1023	4819	4922	2963	3120	2338	2440	"Rod shape-determining protein MreB"
80	Cthe_0089	864	7907	7731	1928	2003	8291	8589	"Rod shape-determining protein MreC"
81	Cthe_0090	531	184	196	146	156	122	110	"Rod shape-determining protein MreD"
82	Cthe_0091	2130	5040	5210	2706	2440	3386	3120	"Peptidoglycan glycosyltransferase"
83	Cthe_0092	684	2271	2068	1883	1999	3432	3645	"Septum formation inhibitor MinC"
84	Cthe_0093	801	8087	8247	12972	12198	14864	13302	"Septum site-determining protein MinD"
85	Cthe_0094	285	6983	7344	10881	9309	10720	8798	"Cell division topological specificity factor MinE"
86	Cthe_0095	396	2223	2450	3001	3205	3480	3677	"Methylglyoxal synthase"
87	Cthe_0097	876	613	668	733	810	818	845	"Peptidase M23"
88	Cthe_0098	810	213	256	688	620	580	601	"Peptidase M50"
89	Cthe_0099	876	1161	1256	3655	3803	743	790	"5,10-methylenetetrahydrofolate reductase-MetF"
90	Cthe_0100	783	4120	4277	5974	5567	2126	2015	"Hypothetical protein"
91	Cthe_0101	1170	6594	6379	8022	8575	3187	3028	"Iron-containing alcohol dehydrogenase"
92	Cthe_0102	657	377	310	1786	1577	989	1054	"tRNA (guanine-N(7)-)-methyltransferase"
93	Cthe_0103	393	215	290	418	500	352	387	"Polysaccharide deacetylase domain-containing protein YjbQ"
94	Cthe_0104	1098	2396	2512	6123	6224	6006	6332	"Riboflavin biosynthesis protein RibD"
95	Cthe_0105	657	3113	2945	1843	1988	1764	1987	"Riboflavin synthase subunit alpha"
96	Cthe_0106	1242	16627	17227	4538	4875	16897	17650	"GTP cyclohydrolase II"
97	Cthe_0107	468	1737	1599	756	710	1153	1303	"6,7-dimethyl-8-ribityllumazine synthase"
98	Cthe_0108	642	1195	1023	5918	5722	454	600	"Type IV pilus assembly PilZ"
99	Cthe_0109	318	60	67	549	588	61	71	"Dockerin type I cellulosome protein"
100	Cthe_0110	957	1511	1655	1482	1395	1263	1127	"HPr(Ser) kinase/phosphatase"
101	Cthe_0111	726	720	745	489	504	1403	1566	"Phosphatase"
102	Cthe_0112	918	970	911	1345	1234	1626	1773	"UDP-N-acetylenolpyruvoylglucosamine reductase"
103	Cthe_0113	876	1112	1320	1067	1225	1026	980	"RNase adapter RapZ"
104	Cthe_0114	1320	2401	2145	2155	2678	2916	2871	"YvcK family protein"
105	Cthe_0115	1980	997	1088	1819	2001	1182	1344	"Glycogen debranching enzyme"
106	Cthe_0116	945	998	899	2626	2780	1115	1345	"DNA-binding protein WhiA"
107	Cthe_0117	273	342	412	359	420	188	201	"Phosphotransferase system, phosphocarrier protein HPr"
108	Cthe_0118	336	15	11	75	68	46	42	"Anti-sigma F factor antagonist"
109	Cthe_0119	450	20	26	67	75	69	64	"Anti-sigma regulatory factor"
110	Cthe_0120	741	24	21	74	89	69	83	"RNA polymerase, sigma 28 subunit, SigF"
111	Cthe_0122	444	9	13	17	23	9	13	"Stage V sporulation protein AC"
112	Cthe_0123	1023	19	25	44	50	60	71	"Stage V sporulation protein AD"
113	Cthe_0124	357	2	4	44	50	6	9	"Stage V sporulation protein AE"
114	Cthe_0125	564	63	78	126	180	128	177	"Stage V sporulation protein AE"
115	Cthe_0126	465	8	10	19	23	10	14	"CheC domain protein"
116	Cthe_0127	495	81	72	363	444	198	234	"RNA methyltransferase, TrmH family, group 2"
117	Cthe_0129	1518	8959	9003	10808	11230	6717	6577	"Metal dependent phosphohydrolase"
118	Cthe_0130	1035	1372	1501	2528	2599	1994	1874	"3-oxoacyl-(acyl-carrier-protein) synthase"
119	Cthe_0131	246	133	111	436	488	104	132	"Phosphopantetheine-binding protein"
120	Cthe_0132	1038	617	576	1095	1201	1592	1650	"3-oxoacyl-(acyl-carrier-protein) synthase"
121	Cthe_0133	1485	234	222	525	502	497	444	"AMP-dependent synthetase and ligase"
122	Cthe_0134	972	115	102	258	242	248	237	"Lysophospholipase"
123	Cthe_0135	8265	1255	1324	1597	1469	2612	2788	"Beta-ketoacyl synthase"
124	Cthe_0136	726	127	110	99	110	195	210	"4'-phosphopantetheinyl transferase"
125	Cthe_0137	1011	12041	12400	12176	13200	22528	21798	"Glyceraldehyde-3-phosphate dehydrogenase, type I"
126	Cthe_0138	1194	8833	9005	7279	7789	13872	14222	"Phosphoglycerate kinase"
127	Cthe_0139	756	7852	7744	6135	6369	8370	8245	"Triosephosphate isomerase"
128	Cthe_0140	1536	22548	22850	18432	18730	11860	10236	"Phosphoglycerate mutase, 2,3-bisphosphoglycerate-independent"
129	Cthe_0142	1638	551	488	2305	2221	281	245	"Metal dependent phosphohydrolase"
130	Cthe_0143	1302	11213	10034	14659	14163	4958	5230	"Phosphopyruvate hydratase"
131	Cthe_0144	252	1244	1155	12709	10020	3375	3551	"Preprotein translocase, SecG subunit"
132	Cthe_0145	552	3464	3241	10624	11356	4601	4788	"Metal dependent phosphohydrolase"
133	Cthe_0146	2274	9806	9686	8645	8766	8192	8056	"Ribonuclease R"
134	Cthe_0147	432	2498	2370	653	750	3521	3588	"DUF523 domain-containing protein"
135	Cthe_0149	258	84	70	262	296	37	33	"HPrNtr domain-containing protein"
136	Cthe_0150	1305	1001	1320	3258	3374	1171	1256	"RNA modification enzyme, MiaB family"
137	Cthe_0151	273	14735	15102	9013	9124	11551	12355	"IreB family regulatory phosphoprotein"
138	Cthe_0152	948	5195	5094	4323	4122	7750	7211	"Aldo/keto reductase"
139	Cthe_0153	426	1466	1720	412	480	1662	1820	"Holliday junction resolvase RuvX"
140	Cthe_0154	291	11119	13450	1390	1623	10027	11245	"DUF1292 domain-containing protein"
141	Cthe_0155	1062	3498	3251	1049	1230	1973	2003	"DUF3048 domain-containing protein"
142	Cthe_0156	1842	4876	4763	4518	4320	9168	10089	"TIGR03961 family B12-binding radical SAM protein"
143	Cthe_0157	840	703	672	283	335	395	365	"DUF2344 domain-containing protein"
144	Cthe_0158	1494	6764	6588	1902	2200	6510	6655	"Ribonuclease G"
145	Cthe_0160	312	7847	7932	15416	16230	16307	16641	"50S ribosomal protein L21"
146	Cthe_0161	342	10361	11450	13333	13780	20455	21345	"Ribosomal-processing cysteine protease Prp"
147	Cthe_0162	279	21161	19875	8462	9120	8308	8277	"50S ribosomal protein L27"
148	Cthe_0163	1275	12959	12398	11087	11566	11449	10233	"GTP-binding protein Obg/CgtA"
149	Cthe_0164	291	2601	2506	1786	1650	1285	1321	"Ribosome assembly RNA-binding protein, YhbY"
150	Cthe_0165	558	663	712	1967	2202	1297	1333	"DUF4364 family protein"
151	Cthe_0166	681	1239	1427	1969	2111	1905	1878	"4Fe-4S ferredoxin iron-sulfur binding domain protein"
152	Cthe_0167	369	55	47	170	162	71	79	"Response regulator"
153	Cthe_0168	471	149	120	813	715	253	290	"Hypothetical protein"
154	Cthe_0169	1083	103	152	893	875	261	245	"FAD dependent oxidoreductase"
155	Cthe_0170	474	16	18	224	234	53	62	"Hypothetical protein"
156	Cthe_0171	240	5	2	39	40	9	15	"Hypothetical protein"
157	Cthe_0172	243	6	9	45	42	7	9	"Hypothetical protein"
158	Cthe_0173	1095	38	43	311	299	140	112	"FAD-dependent pyridine nucleotide-disulfide oxidoreductase"
159	Cthe_0174	1893	2186	2038	1816	1945	1503	1467	"Lipoteichoic acid synthase"
160	Cthe_0175	1137	6070	6150	8536	8675	2438	2537	"Polysaccharide deacetylase family protein"
161	Cthe_0176	351	9492	9377	13057	13565	7544	7455	"Hypothetical protein"
162	Cthe_0177	198	34	43	119	140	19	23	"Metal-dependent phosphohydrolase, HD region"
163	Cthe_0178	1377	4531	4245	5640	5535	2373	2455	"Argininosuccinate lyase"
164	Cthe_0179	1218	10040	11298	17453	16888	2802	2730	"Argininosuccinate synthase"
165	Cthe_0180	489	832	745	3068	2912	1620	1534	"Holliday junction resolvase"
166	Cthe_0181	609	901	1004	817	889	1007	1237	"Holliday junction DNA helicase RuvA"
167	Cthe_0182	993	1868	1735	1166	1266	1746	1840	"Holliday junction DNA helicase RuvB"
168	Cthe_0183	546	1928	2006	1097	1246	1501	1452	"Epoxyqueuosine reductase QueH"
169	Cthe_0184	1104	18073	17450	98568	95230	16029	15899	"Type IV pilus assembly protein PilM"
170	Cthe_0185	2847	4891	5100	21668	21134	9135	9431	"Amidase N-terminal domain"
171	Cthe_0186	1065	780	732	1188	1234	1160	1069	"UDP-glucose 4-epimerase"
172	Cthe_0187	1173	1853	1978	1612	1763	1108	1288	"Lipoprotein LpqB, GerMN domain-containing protein"
173	Cthe_0188	792	3047	3125	797	850	729	820	"Ribonuclease PH"
174	Cthe_0189	600	3205	3029	3561	3672	1723	1888	"XTP/dITP diphosphatase"
175	Cthe_0190	1803	1307	1423	9229	10230	1604	1745	"Proteinase inhibitor I4 serpin"
176	Cthe_0191	1800	1581	1500	7050	6848	1469	1341	"Proteinase inhibitor I4 serpin"
177	Cthe_0193	1185	592	521	1239	1321	470	493	"Potassium transporter"
178	Cthe_0194	384	3980	3743	4459	4321	2631	2587	"Hypothetical protein"
179	Cthe_0195	294	1194	1009	1619	1745	366	351	"ECF subfamily RNA polymerase sigma-24 factor"
180	Cthe_0196	2094	1400	1368	4639	4560	3071	3150	"Glutamine synthetase"
181	Cthe_0197	1092	258	222	1295	1340	2063	2110	"Glutamine amidotransferase family protein"
182	Cthe_0198	1506	150	135	1478	1410	2385	2322	"Glutamate synthase"
183	Cthe_0199	456	17	23	106	138	356	310	"Iron-sulfur cluster-binding protein"
184	Cthe_0200	1236	389	432	598	572	1513	1601	"NAD(P)/FAD-dependent oxidoreductase"
185	Cthe_0201	723	519	502	458	420	1273	1326	"Glutamate synthase"
186	Cthe_0202	1323	1097	1199	1574	1620	2367	2417	"Type I glutamate-ammonia ligase"
187	Cthe_0203	573	385	324	523	578	662	600	"ANTAR domain-containing protein"
188	Cthe_0204	288	1041	1199	4216	4327	1492	1530	"DUF1294 domain-containing protein"
189	Cthe_0205	1959	3002	2899	7474	7222	5165	5070	"Putative UvrD/REP helicase"
190	Cthe_0206	2232	1757	1654	2743	2841	4252	4356	"UvrD/REP helicase"
191	Cthe_0207	834	463	432	861	923	541	530	"PD-(D/E)XK nuclease family protein"
192	Cthe_0208	2292	1362	1217	2529	2435	2637	2788	"Single-stranded-DNA-specific exonuclease RecJ"
193	Cthe_0209	309	69	60	161	188	85	78	"Glycosyl transferase family 2"
194	Cthe_0210	1062	2522	2388	5951	5642	3787	3666	"LacI family transcriptional regulator"
195	Cthe_0211	1005	558	618	2043	1890	1015	1123	"Endo-1,3(4)-beta-glucanase"
196	Cthe_0212	1416	2278	2334	7705	7890	641	620	"Beta-glucosidase, bglA"
197	Cthe_0213	774	2167	2065	926	955	831	850	"DUF975 family protein"
198	Cthe_0214	1020	10612	11276	5781	5379	2349	2244	"Phenylalanyl-tRNA synthetase, alpha subunit"
199	Cthe_0215	2388	27104	26788	10696	11433	6491	6200	"Phenylalanyl-tRNA synthetase, beta subunit"
200	Cthe_0217	1347	13733	12376	6687	6967	3072	3230	"Glucose-6-phosphate isomerase"
201	Cthe_0218	807	2397	2130	1551	1474	506	540	"Metallophosphoesterase"
202	Cthe_0219	474	20	16	207	220	50	63	"Pyridoxamine 5'-phosphate oxidase family protein"
203	Cthe_0221	345	418	402	790	821	298	277	"Hypothetical protein"
204	Cthe_0222	249	202	244	252	350	147	306	"Hypothetical protein"
205	Cthe_0223	438	78	88	222	256	21	30	"UvrD/REP helicase"
206	Cthe_0226	408	1730	1634	1323	1456	3124	3234	"Hypothetical protein"
207	Cthe_0227	345	1055	982	1194	1250	1340	1440	"Hypothetical protein"
208	Cthe_0228	480	661	510	1146	1234	909	1120	"Hypothetical protein"
209	Cthe_0229	1020	1167	1232	2167	2246	1059	978	"NAD-dependent epimerase"
210	Cthe_0230	1707	5963	6120	7017	7190	5175	5214	"Hypothetical protein"
211	Cthe_0231	1338	1841	2001	3049	2922	3019	3099	"Radical SAM protein"
212	Cthe_0232	996	1304	1425	2367	2432	2867	2777	"Hypothetical protein"
213	Cthe_0233	591	833	778	1272	1167	1988	1790	"GNAT family N-acetyltransferase"
214	Cthe_0234	2532	13106	13724	8530	8345	6792	6873	"AMP-dependent synthetase and ligase"
215	Cthe_0235	231	5948	6347	2358	2449	2497	2568	"Glutathione S-transferase N-terminal domain-containing protein"
216	Cthe_0236	1131	3372	3120	6995	7210	6376	6223	"Aldo/keto reductase"
217	Cthe_0238	267	141	132	395	421	243	220	"Hypothetical protein"
218	Cthe_0239	3156	1806	1987	1977	1888	2206	2010	"Dockerin type 1 cellulosome"
219	Cthe_0240	783	1359	1123	990	1120	385	435	"Polyphosphate polymerase domain-containing protein"
220	Cthe_0241	675	2197	2011	3057	3120	1845	1760	"DUF4956 domain-containing protein"
221	Cthe_0242	900	2477	2313	6881	7200	2464	2750	"DUF2156 domain-containing protein"
222	Cthe_0243	849	4856	5230	2808	2900	2700	2533	"Copper amine oxidase"
223	Cthe_0244	2124	3794	3345	3852	3645	1089	1229	"Cadmium-translocating P-type ATPase"
224	Cthe_0245	378	1305	1459	658	750	523	503	"Helix-turn-helix transcriptional regulator"
225	Cthe_0246	2463	2188	2277	1682	1811	544	611	"Carbohydrate binding family 6"
226	Cthe_0247	1806	1741	1820	2063	1938	1151	1089	"DNA mismatch repair protein MutS"
227	Cthe_0248	948	274	235	2837	2603	278	250	"IS982-like element ISCth1 family transposase"
228	Cthe_0249	2409	3346	3482	5261	5500	2522	2412	"Peptidase C11"
229	Cthe_0250	1191	2537	2671	1436	1288	1701	1845	"RNA-splicing ligase RtcB"
230	Cthe_0251	2556	3608	3372	4318	4512	2084	2232	"Transglutaminase domain-containing protein"
231	Cthe_0252	1152	827	910	875	235	1423	1520	"Hypothetical protein"
232	Cthe_0253	990	985	1050	568	620	1053	889	"MoxR family ATPase"
233	Cthe_0254	1341	1008	1200	431	478	589	632	"DUF58 domain-containing protein"
234	Cthe_0255	414	205	108	241	355	205	289	"Hypothetical protein"
235	Cthe_0256	2139	119	185	287	302	254	280	"Substrate-binding domain-containing protein"
236	Cthe_0257	1053	41	37	72	90	124	145	"Type IV pilus twitching motility protein, PilT"
237	Cthe_0258	1410	5325	5164	1648	1842	1785	1888	"LytTR family transcriptional regulator"
238	Cthe_0259	585	1102	1203	1315	1233	586	512	"Rhomboid family intramembrane serine protease"
239	Cthe_0260	2124	95	123	362	388	273	295	"Anti-sigma factor domain-containing protein, RsgI9"
240	Cthe_0261	654	2158	2376	875	906	1036	1089	"HAD-1A family hydrolase"
241	Cthe_0262	1296	10689	9873	11600	12302	3659	3788	"Glutamate-5-semialdehyde dehydrogenase"
242	Cthe_0263	372	3	4	16	22	17	23	"Hypothetical protein"
243	Cthe_0264	426	22	29	10	15	21	28	"Hypothetical protein"
244	Cthe_0265	1122	51082	47580	33748	32400	29942	31120	"Alanine-glyoxylase aminotransferase family protein"
245	Cthe_0266	1488	20734	22301	10408	9974	7238	8211	"Methyl-accepting chemotaxis sensory transducer"
246	Cthe_0267	2016	1159	1078	3017	3210	147	165	"Type 3a cellulose-binding domain protein, RsgI2"
247	Cthe_0268	798	2053	2144	6458	6811	406	389	"RNA polymerase sigma-I factor, SigI2"
248	Cthe_0269	1434	22876	20115	14454	15045	11772	11272	"Glycoside hydrolase family 8, endoglucanase A, celA"
249	Cthe_0270	1455	4864	4400	4947	5276	2716	2677	"Glycoside hydrolase family 18, chitinase"
250	Cthe_0271	927	11754	12344	19821	20122	11456	12389	"Type 3a cellulose-binding domain protein"
251	Cthe_0272	1155	1544	1650	6189	6269	1774	1845	"D-alanyl-D-alanine carboxypeptidase"
252	Cthe_0273	1605	740	689	1382	1544	1049	1230	"Diguanylate cyclase and metal dependent phosphohydrolase"
253	Cthe_0274	1692	799	845	5784	5689	286	334	"Glycoside hydrolase family 9, endoglucanase P"
254	Cthe_0275	2436	9613	9763	4590	4487	4812	4735	"Glycosyltransferase 36, cellobiose phosphorylase Cbp"
255	Cthe_0276	960	2204	2450	1001	870	561	523	"D-2-hydroxyacid dehydrogenase"
256	Cthe_0277	876	342	311	1277	1100	759	711	"Predicted SAM-dependent methyltransferase"
257	Cthe_0278	696	1356	1286	992	941	1106	1325	"RNA pseudouridine synthase"
258	Cthe_0279	192	186	150	380	325	299	350	"Hypothetical protein"
259	Cthe_0280	309	352	324	445	478	376	388	"Spore coat protein"
260	Cthe_0282	1443	61	75	361	389	155	188	"Glycogen synthase, GlgA"
261	Cthe_0283	948	1326	1490	2079	2255	3216	3355	"Aldo/keto reductase"
262	Cthe_0284	1359	2719	2508	4973	4875	5779	5999	"ATP-binding protein"
263	Cthe_0285	1209	16807	17345	15103	15752	12471	11456	"NADP-dependent isocitrate dehydrogenase"
264	Cthe_0286	1275	2451	2201	827	798	1090	889	"Hybrid sensor histidine kinase/response regulator"
265	Cthe_0287	3483	4492	4672	2577	2455	2359	2236	"Multi-sensor hybrid histidine kinase"
266	Cthe_0288	1110	1180	990	4070	4125	890	1002	"Protein-glutamate O-methyltransferase CheR"
267	Cthe_0289	2358	8737	8972	9641	9873	10355	11455	"ATP-dependent DNA helicase"
268	Cthe_0290	1287	3219	3345	3924	4230	2988	3112	"Homoserine dehydrogenase"
269	Cthe_0291	2043	29	23	581	623	96	132	"Thioredoxin domain-containing protein"
270	Cthe_0293	444	252	278	684	745	244	278	"Hypothetical protein"
271	Cthe_0295	1119	8166	7998	8250	8454	2276	2199	"Phosphoserine transaminase"
272	Cthe_0296	1476	2029	2231	3651	3611	947	910	"Hypothetical protein"
273	Cthe_0297	384	638	698	332	285	520	469	"Chemotaxis protein"
274	Cthe_0298	1803	1743	1856	818	911	1056	1123	"HAMP domain-containing protein"
275	Cthe_0299	1371	39494	41200	57856	56110	49229	47780	"MATE efflux family protein"
276	Cthe_0300	618	88	71	2066	2111	415	464	"SafA/ExsA family spore coat assembly protein"
277	Cthe_0301	756	190	222	518	574	356	398	"Threonine/serine exporter family protein"
278	Cthe_0302	441	142	122	3596	3510	784	712	"Threonine/serine exporter"
279	Cthe_0303	447	679	622	2574	2777	976	1378	"Hypothetical protein"
280	Cthe_0304	1071	154	141	1105	1004	414	477	"IS30-like element ISCth3 family transposase"
281	Cthe_0305	1986	8595	8230	7153	7344	7183	7299	"DNA topoisomerase (ATP-hydrolyzing)"
282	Cthe_0306	2184	5329	5450	2983	3122	3250	3455	"Topoisomerase IV"
283	Cthe_0307	378	13037	15620	13812	14325	12644	11255	"DUF4234 domain-containing protein"
284	Cthe_0308	339	1407	1745	2694	2577	2148	2088	"Protein of unknown function DUF2752"
285	Cthe_0309	1983	9615	9360	33519	31356	28215	27898	"Excinuclease ABC subunit, UvrB"
286	Cthe_0310	1047	6264	5841	19010	18792	15652	15442	"Hypothetical protein"
287	Cthe_0311	2829	2892	2983	6823	7098	6175	6245	"Excinuclease ABC subunit, UvrA"
288	Cthe_0312	2412	21812	22344	10588	12987	28764	30032	"ATP-dependent Clp protease ATP-binding subunit"
289	Cthe_0313	1032	953	1123	564	600	372	333	"37 kDa nucleoid-associated protein"
290	Cthe_0314	1179	178	145	523	501	155	177	"Glycosyltransferase 28 domain-containing protein"
291	Cthe_0315	750	131	167	577	523	105	99	"RNA polymerase sigma-I factor, SigI3"
292	Cthe_0316	1935	361	352	1173	1223	193	220	"PA14 domain protein, RsgI3"
293	Cthe_0317	672	662	623	1574	1623	226	235	"Hypothetical protein"
294	Cthe_0318	693	5	4	18	22	10	14	"ErfK/YbiS/YcfS/YnhG family protein"
295	Cthe_0319	645	220	285	247	265	129	135	"Class II aldolase/adducin family protein"
296	Cthe_0320	1467	531	610	810	855	665	692	"Hypothetical protein"
297	Cthe_0321	966	555	613	310	341	173	145	"Tetratricopeptide TPR_1 repeat-containing protein"
298	Cthe_0322	1335	865	945	3429	3511	1632	1742	"Glycoside hydrolase family 3 domain protein"
299	Cthe_0323	243	125	234	91	108	37	32	"Hypothetical protein"
300	Cthe_0324	2655	8872	8475	5674	5566	3784	3412	"Valine-tRNA ligase"
301	Cthe_0325	1938	6110	6321	6558	6387	4636	4712	"NAD+ synthetase"
302	Cthe_0326	204	15	11	81	99	24	27	"Hypothetical protein"
303	Cthe_0327	2574	1227	1456	1067	1188	1944	2111	"S-layer homology domain-containing protein"
304	Cthe_0328	1602	4033	4223	9518	9844	2136	2015	"Peptide chain release factor 3"
305	Cthe_0329	837	1768	1860	2041	1971	1573	1512	"Domain of unknown function DUF1848"
306	Cthe_0330	384	1433	1320	674	745	2289	2100	"SAM-dependent methyltransferase"
307	Cthe_0331	438	249	301	213	233	73	88	"VOC family protein"
308	Cthe_0332	1674	5092	4860	5596	5641	3876	3802	"Nucleoside kinase"
309	Cthe_0333	354	604	674	299	312	138	145	"Hypothetical protein"
310	Cthe_0334	450	1266	1422	769	722	596	623	"Anti-sigma regulatory factor"
311	Cthe_0335	1347	2386	2145	1652	1700	1154	1066	"4Fe-4S dicluster domain-containing protein"
312	Cthe_0336	330	1270	1379	768	810	802	890	"AraC family transcriptional regulator"
313	Cthe_0337	711	334	400	800	845	616	601	"PHP domain protein"
314	Cthe_0338	498	13568	14200	25512	27289	13874	13256	"NADH-quinone oxidoreductase, NuoE subunit"
315	Cthe_0339	567	13156	12555	14208	14845	16387	17200	"Histidine kinase"
316	Cthe_0340	369	11073	10600	10488	11220	14866	15230	"Ferredoxin"
317	Cthe_0341	1794	46154	45632	32064	32869	51187	52241	"NADH dehydrogenase (Quinone)/Ferredoxin"
318	Cthe_0342	1749	30619	28975	23541	23541	18140	18140	"2Fe-2S iron-sulfur cluster binding domain-containing protein"
319	Cthe_0343	603	1023	1232	1108	1168	399	423	"Flavin reductase family protein"
320	Cthe_0344	1173	29513	31025	9411	9623	20747	19845	"Malic enzyme (MalE)"
321	Cthe_0345	957	18712	19524	6765	6900	3917	4231	"Malate dehydrogenase"
322	Cthe_0346	354	179	123	562	584	76	80	"Hypothetical protein"
323	Cthe_0347	1248	9307	9066	5991	6122	1986	2056	"6-Phosphofructokinase"
324	Cthe_0349	930	14096	14400	7859	7710	9295	9152	"Fructose-1,6-bisphosphate aldolase, class II"
325	Cthe_0350	582	3084	3251	3061	2977	2318	2145	"Signal peptidase I"
326	Cthe_0351	1392	2752	2875	5325	5241	6186	6012	"PpiC-type peptidyl-prolyl cis-trans isomerase"
327	Cthe_0352	993	194	145	211	178	153	135	"Hypothetical protein"
328	Cthe_0353	1116	178	165	128	166	139	177	"CoA protein activase"
329	Cthe_0354	990	77	66	192	133	156	188	"2-hydroxyglutaryl-CoA dehydratase"
330	Cthe_0355	1179	632	610	3828	4200	1236	1587	"Hypothetical protein"
331	Cthe_0357	2568	1377	1155	8065	7866	1266	1200	"Alpha-glucan phosphorylase"
332	Cthe_0358	534	2	6	29	35	6	9	"DUF3267 domain-containing protein"
333	Cthe_0359	402	20	32	21	26	15	18	"Protein of unknown function DUF1113"
334	Cthe_0360	330	8290	8540	3163	3312	3995	4123	"Thioredoxin"
335	Cthe_0361	567	9557	9675	6320	6222	5857	6002	"Membrane protein"
336	Cthe_0362	480	5445	5278	9093	9452	4772	4886	"Transcriptional regulator, AsnC family"
337	Cthe_0363	1173	3010	2887	10237	9655	4522	4351	"Aminotransferase class I/II-fold pyridoxal phosphate-dependent enzyme"
338	Cthe_0364	696	274	302	2495	2688	553	650	"XRE family transcriptional regulator"
339	Cthe_0365	1074	11266	12500	8851	9333	6158	6371	"Peptide chain release factor 2"
340	Cthe_0366	2778	4397	4256	8321	8123	2124	2000	"Hypothetical protein"
341	Cthe_0367	870	985	1120	4759	4511	1581	1420	"Rossmann-like and DUF2520 domain-containing protein"
342	Cthe_0368	747	3012	2830	7461	7112	3825	3983	"Nickel pincer cofactor biosynthesis protein LarC"
343	Cthe_0369	1224	2650	2780	4488	4599	4062	4169	"Nickel pincer cofactor biosynthesis protein LarC"
344	Cthe_0370	942	2761	2455	4069	4256	2997	3120	"TIGR01212 family radical SAM protein"
345	Cthe_0372	1395	2282	2314	3418	3580	1832	1988	"NADPH-dependent glutamate synthase"
346	Cthe_0373	846	2099	1989	3851	4023	1469	1545	"Sulfide/dihydroorotate dehydrogenase-like FAD/NAD-binding protein"
347	Cthe_0374	1335	1145	1055	2402	2531	1570	1500	"NADP-specific glutamate dehydrogenase"
348	Cthe_0375	1536	13936	14235	15010	16023	5110	4888	"Glutamine-hydrolyzing GMP synthase, GuaA"
349	Cthe_0376	354	75	89	785	877	448	490	"BlaI/MecI/CopY family transcriptional regulator"
350	Cthe_0377	909	34	45	349	402	175	202	"Peptidase M56 BlaR1/Antirepressor regulating drug resistance"
351	Cthe_0378	609	33	55	214	250	92	130	"Hypothetical protein"
352	Cthe_0379	963	13	19	112	132	76	101	"Hypothetical protein"
353	Cthe_0380	240	41	30	221	256	110	155	"Hypothetical protein"
354	Cthe_0381	723	149	189	1007	1230	343	423	"Hypothetical protein"
355	Cthe_0382	483	60	93	949	1122	116	150	"Hypothetical protein"
356	Cthe_0383	597	26	32	204	220	88	97	"ABC transporter permease"
357	Cthe_0384	714	128	156	658	722	228	244	"ABC-type antimicrobial peptide transport system, ATPase component"
358	Cthe_0386	606	26	45	61	82	31	40	"Hypothetical protein"
359	Cthe_0388	1035	141418	145213	161995	165210	69019	67880	"Alcohol dehydrogenase GroES domain protein"
360	Cthe_0389	972	135211	137420	92240	91120	54354	55778	"Fructokinase"
361	Cthe_0390	1215	151472	154654	89932	86451	70653	68123	"ROK family transcriptional regulator"
362	Cthe_0391	1500	77653	79871	354876	356216	147250	148663	"ATP-binding protein (nbdA)"
363	Cthe_0392	1050	424	389	3988	4300	3313	3541	"Inner-membrane translocator (msdA)"
364	Cthe_0393	966	61	58	1144	1238	450	478	"Ribose ABC transporter (CbpA)"
365	Cthe_0394	1170	147	165	1955	2111	873	930	"Iron-containing alcohol dehydrogenase"
366	Cthe_0395	456	28	33	338	366	135	154	"RbsD or FucU transporter"
367	Cthe_0396	1725	305	325	1165	1101	515	477	"ABC transporter ATP-binding protein"
368	Cthe_0397	1761	204	222	688	720	336	388	"ABC transporter transmembrane region"
369	Cthe_0398	321	971	1003	1046	1103	874	920	"Putative heavy metal-binding protein"
370	Cthe_0399	837	503	567	2652	2453	1014	1058	"TPM domain-containing protein"
371	Cthe_0400	1029	967	875	2802	2933	752	818	"DNA helicase"
372	Cthe_0401	2268	3573	3640	11451	14233	4646	4799	"Methyl-accepting chemotaxis protein"
373	Cthe_0402	2199	17888	16870	31466	30225	11322	10880	"Copper amine oxidase"
374	Cthe_0403	825	1329	1450	1523	1588	842	801	"RNA polymerase, sigma 28 subunit, SigI4"
375	Cthe_0404	1569	1493	1410	4322	4299	3233	3328	"Type 3a cellulose-binding domain protein, RsgI4"
376	Cthe_0405	1581	2580	2784	3524	3596	1922	2119	"Cellulase family glycosylhydrolase"
377	Cthe_0406	738	867	701	2091	1890	3100	3012	"DNA metabolism protein"
378	Cthe_0407	1308	1596	1477	7314	7211	7780	7566	"Putative DNA modification/repair radical SAM protein"
379	Cthe_0408	2589	2160	2201	6489	6558	3975	4112	"EAL domain-containing protein"
380	Cthe_0409	270	1655	1741	887	902	2090	1890	"ACT domain-containing protein"
381	Cthe_0410	1359	12317	12584	7866	7633	7507	7266	"Pyruvate formate lyase (PFL) family protein"
382	Cthe_0411	1035	1104	1325	2518	2688	228	200	"Hypothetical protein"
383	Cthe_0412	2688	51598	54580	105755	101459	107456	102889	"Glycoside hydrolase family 9, Cellulase K"
384	Cthe_0413	3675	9377	9452	40093	40620	45519	47820	"Cellulose 1,4-beta-cellobiosidase"
385	Cthe_0417	264	373	388	426	502	1056	1122	"30S ribosomal protein S15"
386	Cthe_0418	2103	8031	8241	3792	3988	2914	3110	"Polyribonucleotide nucleotidyltransferase"
387	Cthe_0419	1260	3060	3172	552	587	552	610	"Insulinase family protein"
388	Cthe_0420	873	73	88	91	110	185	202	"Dipicolinate synthase subunit A"
389	Cthe_0421	585	50	56	75	82	118	166	"Dipicolinate synthase subunit B"
390	Cthe_0422	684	11381	12399	34070	33567	67263	62210	"Redox-sensing transcriptional repressor Rex"
391	Cthe_0423	2622	37132	39411	110760	114578	183975	186231	"Bifunctional acetaldehyde-CoA/alcohol dehydrogenase"
392	Cthe_0424	750	23698	24600	61018	59342	109276	104550	"Aminoglycoside phosphotransferase"
393	Cthe_0425	246	10015	11232	27576	24008	44977	43833	"(2Fe-2S) ferredoxin domain-containing protein"
394	Cthe_0426	1671	31525	33875	63382	61238	128120	125889	"4Fe-4S binding protein"
395	Cthe_0427	1170	29082	31200	28029	26780	96459	97488	"SpoIIE family protein phosphatase"
396	Cthe_0428	498	828	900	1225	1345	9519	9788	"NAD(P)H-dependent oxidoreductase subunit E"
397	Cthe_0429	1875	20007	18755	18214	19910	83451	82875	"NADH-quinone oxidoreductase subunit NuoF"
398	Cthe_0430	1701	14300	13840	12467	12203	51204	49910	"4Fe-4S dicluster domain-containing protein"
399	Cthe_0431	246	2905	2745	2261	2321	3811	3734	"(2Fe-2S) ferredoxin domain-containing protein"
400	Cthe_0432	678	2	6	48	57	27	32	"Hypothetical protein"
401	Cthe_0433	2370	5498	5645	6468	6670	10693	9888	"Endo-1,4-beta-glucanase, glycoside hydrolase family 9"
402	Cthe_0434	1101	69	81	85	98	271	299	"ATPase"
403	Cthe_0435	1053	5154	5271	6219	6345	2452	2675	"Dockerin type 1 cellulosome, endo-beta-1,4-glucanase, CtCel124"
404	Cthe_0436	3171	6735	6845	10710	9945	4793	4587	"Tetratricopeptide repeat protein"
405	Cthe_0437	459	1050	1232	1250	1199	585	532	"Hypothetical protein"
406	Cthe_0438	387	14	17	130	166	47	55	"LuxR family transcriptional regulator"
407	Cthe_0439	747	768	841	706	745	855	890	"Glutamine amidotransferase"
408	Cthe_0440	1404	611	704	648	612	865	905	"UDP-N-acetylmuramyl tripeptide synthase"
409	Cthe_0441	864	1238	1154	2330	2222	2096	2300	"UDP-N-acetylglucosamine 1-carboxyvinyltransferase"
410	Cthe_0442	861	2698	2812	6642	6703	5528	5760	"Cell division protein FtsQ"
411	Cthe_0443	378	2997	3233	3277	3401	2990	3321	"Small basic family protein"
412	Cthe_0444	1242	7614	7800	5982	5700	6768	6934	"Cell division protein FtsA"
413	Cthe_0445	1131	5129	5342	5340	5288	5830	6100	"Cell division protein FtsZ"
414	Cthe_0446	894	55	66	170	189	63	77	"Sigma-E processing peptidase SpoIIGA"
415	Cthe_0447	735	32	35	42	49	29	33	"RNA polymerase sporulation sigma factor SigE"
416	Cthe_0448	774	10	7	53	49	33	39	"RNA polymerase sporulation sigma factor SigG"
417	Cthe_0450	456	362	351	273	307	523	588	"Transcriptional regulator NrdR"
418	Cthe_0451	1872	1483	1544	1073	1233	1359	1234	"Motility associated factor glycosyltransferase family protein"
419	Cthe_0452	774	972	1120	284	300	570	588	"Cellulosome anchoring protein cohesin region, OlpC"
420	Cthe_0453	441	17	23	45	55	25	34	"Hypothetical protein"
421	Cthe_0454	405	1	6	11	16	8	12	"Hypothetical protein"
422	Cthe_0455	1539	2299	2456	1818	1900	3679	3788	"YifB family Mg chelatase-like AAA ATPase"
423	Cthe_0456	417	515	623	356	402	436	412	"Thiamine phosphate synthase"
424	Cthe_0457	363	74	84	42	47	71	75	"YccF domain-containing protein"
425	Cthe_0458	756	3932	4320	2915	3012	2186	2320	"Exodeoxyribonuclease III Xth"
426	Cthe_0459	1113	2294	2540	1039	1133	3923	4122	"DNA protecting protein DprA"
427	Cthe_0460	2109	6858	7120	2716	2899	2475	2666	"DNA topoisomerase I"
428	Cthe_0461	1311	3805	3742	2034	1899	3626	3788	"Methylenetetrahydrofolate--tRNA-(uracil(54)-C(5))-methyltransferase (FADH(2)-oxidizing) TrmFO"
429	Cthe_0462	405	4072	3845	15892	16283	3875	3999	"Flagellar basal body rod protein FlgB"
430	Cthe_0463	444	4856	4988	10053	9860	5459	5578	"Flagellar basal-body rod protein FlgC"
431	Cthe_0464	315	1094	1122	2952	3015	1583	1672	"Flagellar hook-basal body complex protein FliE"
432	Cthe_0465	1554	3761	3450	16766	17100	8385	8540	"Flagellar M-ring protein FliF"
433	Cthe_0466	1023	624	720	2071	2115	1365	1458	"Flagellar motor switch protein FliG"
434	Cthe_0467	792	863	755	1771	1900	1571	1630	"Flagellar assembly protein FliH/Type III secretion system HrpE"
435	Cthe_0468	1314	508	490	1024	1210	1221	1331	"Flagellar protein export ATPase Flil/ATPase, FliI/YscN family"
436	Cthe_0469	459	145	166	440	470	472	500	"Flagellar export protein FliJ"
437	Cthe_0470	831	84	98	193	219	213	244	"Hypothetical protein"
438	Cthe_0471	1587	601	650	749	832	1645	1733	"Flagellar hook-length control protein-like, C-terminal domain-containing protein"
439	Cthe_0472	972	304	290	254	289	700	767	"Flagellar hook capping protein"
440	Cthe_0473	390	78	88	149	176	451	420	"Flagellar operon protein"
441	Cthe_0474	1323	212	180	426	403	1185	1220	"Flagellar hook-basal body protein"
442	Cthe_0475	291	818	910	6407	6502	1746	1834	"Flagellar FlbD family protein"
443	Cthe_0476	504	1339	1450	5471	5233	2412	2278	"Flagellar basal body-associated protein FliL"
444	Cthe_0477	987	1407	1487	3050	2899	2154	2344	"Flagellar motor switch protein FliM"
445	Cthe_0478	1221	1753	1932	2826	2990	2926	3004	"CheC, inhibitor of MCP methylation / FliN fusion protein"
446	Cthe_0479	363	753	701	619	689	1151	1233	"Response regulator receiver protein"
447	Cthe_0480	498	715	680	553	586	737	799	"Flagellar biosynthetic protein FliO"
448	Cthe_0481	783	79	85	133	154	39	45	"Flagellar biosynthetic protein FliP"
449	Cthe_0482	270	242	276	179	189	189	205	"Flagellar biosynthetic protein FliQ"
450	Cthe_0483	786	836	989	4100	4235	1103	1087	"Flagellar biosynthetic protein FliR"
451	Cthe_0484	1179	679	750	1279	1155	922	1056	"Flagellar biosynthetic protein FlhB"
452	Cthe_0485	2031	948	1100	1269	1201	975	1083	"Flagellar biosynthesis protein FlhA"
453	Cthe_0486	1212	731	823	1392	1422	1007	1145	"Flagellar biosynthetic protein FlhF"
454	Cthe_0487	909	459	523	388	423	333	310	"Cobyrinic acid ac-diamide synthase/ATPases involved in chromosome partitioning"
455	Cthe_0488	675	661	735	141	158	804	889	"Type IV pilus assembly PilZ"
456	Cthe_0489	1065	754	822	337	387	879	925	"Response regulator receiver modulated CheB methylesterase"
457	Cthe_0490	2079	1586	1675	882	1005	1287	1136	"CheA signal transduction histidine kinase"
458	Cthe_0491	465	337	352	228	256	419	468	"CheW protein/Chemotaxis signal transduction protein"
459	Cthe_0492	621	242	277	173	155	338	390	"Chemotaxis protein CheC"
460	Cthe_0493	486	341	363	179	202	359	396	"CheD, stimulates methylation of MCP proteins/Chemoreceptor glutamine deamidase CheD"
461	Cthe_0494	399	346	323	122	109	308	332	"Hypothetical protein"
462	Cthe_0495	657	132	145	69	75	76	84	"RNA polymerase, sigma 28 subunit"
463	Cthe_0498	1629	19339	21234	50021	48872	50676	50100	"Predicted polymerase, most protein contain PALM domain"
464	Cthe_0499	312	2751	2917	3120	3003	8806	8955	"Hypothetical protein"
465	Cthe_0500	585	4353	4477	5900	6200	12905	13310	"Hypothetical protein"
466	Cthe_0501	630	3181	3345	3233	3056	7913	8169	"Aminodeoxychorismate lyase"
467	Cthe_0502	867	37	45	107	94	177	155	"Hypothetical protein"
468	Cthe_0503	552	430	444	305	287	627	603	"2'-5' RNA ligase"
469	Cthe_0504	1236	12300	12502	30367	28921	25764	26003	"Poly-gamma-glutamate biosynthesis protein"
470	Cthe_0505	2229	22228	23670	37747	35421	50324	51389	"Pyruvate-formate lyase"
471	Cthe_0506	717	4488	4550	9202	9076	12584	11230	"Pyruvate formate-lyase-activating enzyme"
472	Cthe_0507	648	583	610	3463	3248	3601	3489	"Exonuclease RNase T and DNA polymerase III"
473	Cthe_0508	411	343	402	855	815	1715	1899	"Hypothetical protein"
474	Cthe_0509	1080	2299	2442	2584	2779	924	1108	"Sodium ion-translocating decarboxylase, beta subunit"
475	Cthe_0511	1323	825	910	7298	7421	802	930	"Histidine kinase"
476	Cthe_0512	1521	412	478	429	403	406	445	"Site-specific integrase"
477	Cthe_0514	1116	143	123	625	667	301	335	"DNA methylase N-4/N-6 domain protein"
478	Cthe_0515	1536	2321	2534	9650	9855	2735	2923	"Transposase IS66"
479	Cthe_0516	357	31	38	189	225	22	28	"IS66 Orf2 family protein"
480	Cthe_0517	369	7	10	46	53	11	16	"Transposase"
481	Cthe_0518	2976	1463	1567	1570	1670	1046	1220	"Type III site-specific deoxyribonuclease"
482	Cthe_0519	1833	1145	1343	1251	1378	693	723	"Site-specific DNA-methyltransferase (Adenine-specific)/DNA methylase N-4/N-6"
483	Cthe_0520	726	433	465	320	356	168	202	"DUF4391 domain-containing protein"
484	Cthe_0521	3270	3552	3677	3267	3406	1494	1630	"SNF2-related protein/Helicase-like protein"
485	Cthe_0522	276	1648	1767	663	720	317	387	"Helix-turn-helix domain-containing protein"
486	Cthe_0523	597	117	157	37	45	43	51	"Resolvase domain-containing protein/Site-specific recombinases"
487	Cthe_0524	474	81	92	68	77	22	28	"Hypothetical protein"
488	Cthe_0525	483	174	189	161	178	43	51	"Hypothetical protein"
489	Cthe_0526	444	124	190	107	134	45	57	"Hypothetical protein"
490	Cthe_0527	246	64	88	89	100	16	20	"Hypothetical protein"
491	Cthe_0530	615	3	6	29	34	4	7	"Peptidoglycan-binding lysin domain"
492	Cthe_0531	2289	479	512	937	889	351	378	"Hypothetical protein"
493	Cthe_0532	492	202	230	523	588	145	120	"Haloacid dehalogenase domain protein hydrolase"
494	Cthe_0533	1533	1209	1350	5807	5720	3954	3765	"Radical SAM/SPASM domain-containing protein"
495	Cthe_0534	2184	781	812	3429	3322	2356	2170	"Chain A, ABC-type Bacteriocin Transporter"
496	Cthe_0535	273	96	105	194	220	229	245	"Hypothetical protein"
497	Cthe_0536	1692	10578	11267	9197	9228	3145	3058	"Glycoside hydrolase family 5, endo-beta-1,4-glucanase B"
498	Cthe_0537	672	1257	1324	1415	1378	2050	2130	"Two component transcriptional regulator, winged helix family"
499	Cthe_0538	1017	841	869	608	690	1328	1521	"Periplasmic sensor signal transduction histidine kinase"
500	Cthe_0539	684	1100	1234	730	710	3941	4200	"ABC transporter ATP-binding protein"
501	Cthe_0540	2607	1704	1666	1876	2040	11241	12468	"ABC-type transport system, involved in lipoprotein release, permease component"
502	Cthe_0541	1194	2358	2199	650	730	1431	1567	"Peptidase M24/Xaa-Pro aminopeptidase"
503	Cthe_0542	732	1046	1221	335	302	454	533	"M48 family metallopeptidase"
504	Cthe_0543	2220	4698	4477	9797	10234	7517	7728	"Glycoside hydrolase family 9, endo-beta-1,4-glucanase F"
505	Cthe_0544	876	2632	2704	1166	1078	901	823	"Protein serine/threonine phosphatase"
506	Cthe_0545	429	599	622	336	290	265	201	"Prepilin peptidase CpaA"
507	Cthe_0546	420	157	163	200	234	82	70	"Ferric uptake regulator, Fur family"
508	Cthe_0547	957	1832	1999	2163	2348	846	890	"Periplasmic solute binding protein/ABC-type metal ion transport system"
509	Cthe_0548	780	1351	1521	1621	1720	807	852	"Metal ABC transporter ATP-binding protein"
510	Cthe_0549	855	3142	3310	5332	5229	1242	1100	"Metal ABC transporter permease"
511	Cthe_0550	1905	14924	13765	2568	2404	6395	6176	"Molecular chaperone HtpG"
512	Cthe_0551	1665	5102	4988	8010	8231	5773	5544	"AMP-dependent synthetase and ligase"
513	Cthe_0552	552	2157	2010	3754	3411	2508	2633	"Transcriptional regulator"
514	Cthe_0553	900	330	303	1099	1234	412	389	"LysR family transcriptional regulator"
515	Cthe_0554	3771	3485	3548	2593	2756	2528	2733	"Phosphoribosylformylglycinamidine synthase"
516	Cthe_0555	1242	15405	16230	13244	13769	17329	16820	"PpiC-type peptidyl-prolyl cis-trans isomerase"
517	Cthe_0556	1842	113	101	632	590	795	721	"Asparagine synthase (Glutamine-hydrolyzing)"
518	Cthe_0557	771	7	9	59	62	38	43	"Polysaccharide deacetylase"
519	Cthe_0558	651	6	9	23	18	19	22	"Glutamate ligase"
520	Cthe_0559	717	909	1128	177	154	105	91	"Single-stranded DNA-binding protein"
521	Cthe_0560	1776	926	989	3469	3588	2226	2389	"FAD-dependent oxidoreductase"
522	Cthe_0561	1047	1945	2089	2193	2055	1230	1089	"ApbE family lipoprotein"
523	Cthe_0562	381	651	621	231	204	231	212	"NusG domain II-containing protein"
524	Cthe_0563	513	502	472	225	289	272	211	"Gx transporter family protein"
525	Cthe_0564	957	548	505	421	650	414	505	"Polyprenyl synthetase family protein"
526	Cthe_0565	420	1073	1303	5021	5234	2016	1892	"Hypothetical protein"
527	Cthe_0566	2448	6104	6002	4668	4565	4678	4321	"Primosomal protein N', priA"
528	Cthe_0567	513	2132	2435	1546	1430	1510	1752	"Peptide deformylase"
529	Cthe_0568	936	2581	2661	1976	2200	1522	1467	"Methionyl-tRNA formyltransferase"
530	Cthe_0569	756	1048	1146	545	504	317	301	"Protein of unknown function DUF116"
531	Cthe_0570	684	1034	1203	718	820	1166	1289	"Zinc metallopeptidase"
532	Cthe_0571	1368	2788	2965	2778	2620	3299	3441	"16S rRNA (cytosine(967)-C(5))-methyltransferase RsmB"
533	Cthe_0572	1050	3655	3467	2754	2677	4176	4238	"23S rRNA (adenine(2503)-C(2))-methyltransferase RlmN"
534	Cthe_0573	738	5533	5669	4590	4231	4472	4599	"Stp1/IreP family PP2C-type Ser/Thr phosphatase"
535	Cthe_0574	2112	10613	12452	6490	6021	6524	6378	"Serine/threonine protein kinase with PASTA sensor(S)"
536	Cthe_0575	885	7244	7005	4187	4099	3815	3678	"Ribosome small subunit-dependent GTPase A"
537	Cthe_0576	663	991	1100	747	845	692	752	"Ribulose-phosphate 3-epimerase"
538	Cthe_0577	639	2583	2745	1080	1344	1309	1267	"Thiamine diphosphokinase"
539	Cthe_0578	2211	5295	5123	15865	16733	14012	13348	"Glycoside hydrolase family 9, endo-beta-1,4-glucanase R"
540	Cthe_0579	522	442	388	814	790	234	220	"Nitroreductase"
541	Cthe_0580	1194	839	810	2536	2430	2306	2178	"Aspertate aminotransferase"
542	Cthe_0581	1767	1357	1222	2666	2877	2616	2890	"Fibronectin/fibrinogen-binding protein"
543	Cthe_0582	1764	208	190	734	890	868	950	"PAS domain S-box protein"
544	Cthe_0583	1185	1063	888	3354	3176	1857	2003	"Response regulator receiver protein"
545	Cthe_0584	291	1625	1578	2088	2300	2078	2134	"DUF503 domain-containing protein"
546	Cthe_0592	666	265	234	311	289	557	510	"Class I SAM-dependent methyltransferase"
547	Cthe_0593	999	868	900	2318	2459	405	432	"Copper amine oxidase-like domain-containing protein"
548	Cthe_0595	1068	36	45	160	189	38	20	"Hypothetical protein"
549	Cthe_0596	624	573	520	3466	3600	474	498	"YihA family ribosome biogenesis GTP-binding protein"
550	Cthe_0597	201	3242	3456	795	721	271	234	"Thiamine biosynthesis protein ThiS"
551	Cthe_0598	768	4516	4670	2169	2003	3000	3120	"Thiazole biosynthesis family protein"
552	Cthe_0599	1110	1532	1678	514	490	466	423	"2-iminoacetate synthase ThiH"
553	Cthe_0600	645	2942	3221	562	510	379	404	"Sulfur carrier protein ThiS adenylyltransferase ThiF"
554	Cthe_0601	1071	3299	3058	997	1204	598	670	"Thiamine phosphate synthase"
555	Cthe_0602	1299	4411	4378	1670	1770	2223	2345	"Phosphomethylpyrimidine synthase ThiC"
556	Cthe_0603	525	498	540	1335	1453	248	233	"GNAT family N-acetyltransferase"
557	Cthe_0604	258	464	423	1479	1602	619	687	"Hypothetical protein"
558	Cthe_0605	1113	4966	5234	38895	40123	34448	35400	"C40 family peptidase"
559	Cthe_0606	2337	2587	2766	16749	17833	14804	15398	"DNA internalization-related competence protein ComEC/Rec2"
560	Cthe_0607	1050	1960	2034	3860	3990	2512	2489	"M20/M25/M40 family metallo-hydrolase"
561	Cthe_0608	1050	932	890	726	711	1516	1678	"M42 family metallopeptidase"
562	Cthe_0609	978	1001	1232	580	545	940	900	"M42 family metallopeptidase"
563	Cthe_0610	1068	140	120	327	311	214	201	"Histidinol-phosphate aminotransferase"
564	Cthe_0611	1626	3244	3022	3549	3457	2685	2600	"MBL fold metallohydrolase"
565	Cthe_0612	1512	17225	18238	35195	36789	17430	18123	"Sodium:solute symporter family protein"
566	Cthe_0613	1806	13528	12789	13424	15410	9788	9567	"Indolepyruvate ferredoxin oxidoreductase, alpha subunit"
567	Cthe_0614	576	4363	4568	2758	2945	3722	3622	"Indolepyruvate ferredoxin oxidoreductase, beta subunit"
568	Cthe_0615	1302	10561	12369	6447	6222	8062	8369	"Phenylacetate-CoA ligase"
569	Cthe_0616	432	1512	1420	1369	1289	2970	3056	"ACT domain-containing protein"
570	Cthe_0617	1299	7640	7789	6735	6420	9866	10689	"Replication-associated recombination protein A"
571	Cthe_0618	2166	19480	18122	162831	164875	6429	6023	"Ferrous iron transport protein B"
572	Cthe_0619	222	1081	1233	2308	2435	159	111	"Ferrous iron transport protein A"
573	Cthe_0620	393	7272	7545	9552	9877	3760	3281	"Metal-dependent transcriptional regulator"
574	Cthe_0621	1029	3808	3956	4004	4233	2761	2933	"S-methyl-5-thioribose-1-phosphate isomerase"
575	Cthe_0622	807	2356	2555	2103	2300	826	789	"S-methyl-5'-thioadenosine phosphorylase"
576	Cthe_0623	639	10033	11563	2797	2386	904	1123	"TraR/DksA C4-type zinc finger protein"
577	Cthe_0624	4806	5884	5423	6345	7200	1038	963	"Glycoside hydrolase family 9, processive endoglucanase J"
578	Cthe_0625	2133	1302	1452	6960	7266	373	312	"Glycoside hydrolase family 9, endo-beta-1,4-glucanase Q"
579	Cthe_0626	1413	3716	3987	3675	3489	1332	1102	"ParA family protein"
580	Cthe_0627	876	4770	4999	3027	2782	1325	1125	"Flagellar biosynthesis protein FlgA"
581	Cthe_0628	837	1309	1463	505	478	247	236	"ATPases involved in chromosome partitioning"
582	Cthe_0629	1446	6352	6588	3226	3111	1670	1536	"Type II secretion system protein E"
583	Cthe_0630	978	2746	2875	1788	1930	472	520	"Hypothetical protein"
584	Cthe_0631	885	2448	2635	1294	1199	439	454	"Hypothetical protein"
585	Cthe_0632	603	5093	5542	3933	3642	2361	2030	"Hypothetical protein"
586	Cthe_0633	486	429	401	550	513	87	78	"Hypothetical protein"
587	Cthe_0634	2088	1448	1863	9839	9974	5042	5299	"DUF5050 domain-containing protein"
588	Cthe_0635	831	427	600	4570	4756	2053	2136	"Serine/threonine-protein phosphatase"
589	Cthe_0636	249	191	156	1136	989	2090	1980	"Hypothetical protein"
590	Cthe_0637	303	1123	1065	4058	4256	2836	3002	"WXG100 family type VII secretion target"
591	Cthe_0638	4680	1248	1020	3431	3587	1453	1544	"Type VII secretion protein EssC"
592	Cthe_0639	1203	1725	1980	7599	8233	1555	1742	"Glycoside hydrolase family 13 domain protein"
593	Cthe_0640	1749	1210	1444	2486	2389	584	523	"Dockerin type 1 cellulosome"
594	Cthe_0641	243	18	23	53	63	59	77	"Spore coat protein"
595	Cthe_0642	186	30	26	104	156	75	83	"Hypothetical protein"
596	Cthe_0643	1074	19	22	92	105	26	32	"Hypothetical protein"
597	Cthe_0644	645	867	900	820	844	571	512	"Methionine synthase"
598	Cthe_0645	2415	3407	3567	3246	3389	3313	3472	"Methionine synthase (B12-dependent)"
599	Cthe_0646	2091	4844	5234	74920	72340	32332	31247	"Anaerobic ribonucleoside-triphosphate reductase"
600	Cthe_0647	690	3383	3125	20085	22789	10166	9874	"Anaerobic ribonucleoside-triphosphate reductase activating protein"
601	Cthe_0648	1641	3200	3560	4345	4221	2087	2011	"Glutamate-tRNA ligase"
602	Cthe_0649	330	44	58	786	834	116	145	"Hypothetical protein"
603	Cthe_0650	300	113	145	622	770	677	699	"Hypothetical protein"
604	Cthe_0651	339	22	26	224	267	29	34	"Hypothetical protein"
605	Cthe_0652	237	43	48	195	213	31	38	"4-oxalocrotonate tautomerase"
606	Cthe_0653	264	16031	17345	12310	11245	10116	9980	"CopG family transcriptional regulator"
607	Cthe_0654	1377	7997	8122	7874	7745	5610	5589	"[FeFe] hydrogenase H-cluster radical SAM maturase HydG"
608	Cthe_0655	1146	6755	6645	9486	9877	4637	4799	"Aminotransferase class V-fold PLP-dependent enzyme"
609	Cthe_0656	1107	21271	22677	22676	21456	8564	8855	"Type IV pilus assembly protein PilM"
610	Cthe_0657	600	334	367	365	389	34	45	"Hypothetical protein"
611	Cthe_0660	2322	229	211	1633	1766	345	403	"Glycoside hydrolase family 81, beta-1,3-glucanase"
612	Cthe_0661	1716	1378	1233	3058	3278	1855	1987	"[Arabinogalactan] exo-?-1,3-galactanase"
613	Cthe_0662	300	10	13	7	9	0	4	"Hypothetical protein"
614	Cthe_0663	570	372	404	1517	1655	100	123	"DUF4352 domain-containing protein"
615	Cthe_0664	813	37	43	86	92	18	22	"Hypothetical protein"
616	Cthe_0665	969	877	903	490	505	761	789	"FtsH protease activity modulator HflK"
617	Cthe_0666	870	442	478	355	333	247	222	"Protease modulator HflC"
618	Cthe_0667	1770	28	31	119	134	57	77	"GerA spore germination protein"
619	Cthe_0669	1311	13	16	32	36	47	55	"Germination protein, Ger(x)C family"
620	Cthe_0670	1098	11	9	118	133	14	18	"Endospore germination permease"
621	Cthe_0672	816	1291	1344	7048	7345	1877	2008	"Pyrroline-5-carboxylate reductase"
622	Cthe_0673	444	1040	1123	456	498	662	655	"Ribonuclease H"
623	Cthe_0674	549	1019	1255	676	689	769	800	"NUDIX hydrolase"
624	Cthe_0675	555	21	28	34	40	6	9	"Stage II sporulation protein M"
625	Cthe_0676	891	263	289	1076	1145	134	156	"Tyrosine recombinase, XerD"
626	Cthe_0677	1167	555	605	1553	1588	983	890	"Phosphopentomutase"
627	Cthe_0678	1302	913	945	1209	1300	1079	1003	"Thymidine phosphorylase"
628	Cthe_0679	1215	623	601	944	999	620	598	"Serine-type D-Ala-D-Ala carboxypeptidase"
629	Cthe_0680	654	614	712	365	333	237	257	"Lysine exporter protein (LYSE/YGGA)"
630	Cthe_0681	1494	34532	37409	13212	12444	15232	14630	"Inosine 5-monophosphate dehydrogenase"
631	Cthe_0682	978	99	87	998	1033	362	390	"Hypothetical protein"
632	Cthe_0683	1314	1407	1467	2856	3222	2151	2456	"Diaminopimelate decarboxylase"
633	Cthe_0684	2634	1358	1222	3261	3167	2445	2641	"CBS domain-containing protein"
634	Cthe_0685	672	495	411	2100	2356	759	708	"Site-2 protease family protein"
635	Cthe_0686	990	2551	2788	3280	3410	6739	6955	"Tryptophan-tRNA ligase"
636	Cthe_0687	795	3723	3848	4852	4522	8896	9344	"Chromosome segregation and condensation protein ScpA"
637	Cthe_0688	597	881	780	1187	1246	2215	2400	"Chromosome segregation and condensation protein, ScpB"
638	Cthe_0689	570	876	803	1316	1455	1739	1998	"RDD domain containing protein"
639	Cthe_0690	609	48	54	209	218	109	123	"DUF2953 domain-containing protein"
640	Cthe_0691	489	68	77	87	98	96	105	"Sporulation protein YtfJ"
641	Cthe_0693	720	970	1012	1881	1944	599	520	"Ribosomal large subunit pseudouridine synthase B"
642	Cthe_0694	828	3421	3648	8189	8432	2682	2466	"Polyamine aminopropyltransferase"
643	Cthe_0695	870	742	621	1976	2178	1747	1922	"Agmatinase, arginase family"
644	Cthe_0696	567	1073	1222	2391	2156	1269	1478	"Methyltransferase domain-containing protein"
645	Cthe_0697	735	152	123	514	588	188	202	"Type IV pilus assembly PilZ"
646	Cthe_0699	1551	6689	7543	14517	16781	18813	20031	"Methylmalonyl-CoA carboxyltransferase"
647	Cthe_0700	399	2150	2345	8741	8999	9794	9921	"Biotin/lipoyl binding protein"
648	Cthe_0701	1398	4831	4555	15785	17089	23496	24877	"Oxaloacetate decarboxylase subunit alpha"
649	Cthe_0702	528	412	388	7578	7755	1970	2132	"Hypothetical protein"
650	Cthe_0703	243	6595	6644	16184	16789	6225	7004	"Hypothetical protein"
651	Cthe_0705	237	16	12	71	82	10	14	"YpmA family protein"
652	Cthe_0706	900	2069	2266	7875	7611	1679	2145	"MurR/RpiR transcriptional regulator"
653	Cthe_0707	630	1247	1452	2879	3003	595	634	"Phosphoglycerate mutase"
654	Cthe_0708	1230	545	590	1304	1543	412	380	"NAD(P)/FAD-dependent oxidoreductase"
655	Cthe_0709	501	291	333	347	311	368	398	"Hypothetical protein"
656	Cthe_0710	435	22291	24567	26250	26978	17607	18223	"Hut operon positive regulator HutP"
657	Cthe_0711	357	5080	4850	4183	4237	7463	7521	"Chorismate mutase"
658	Cthe_0712	684	11616	10234	12505	13202	13920	14566	"(d)CMP kinase"
659	Cthe_0713	612	3432	3245	6046	6288	7294	7468	"1-acyl-sn-glycerol-3-phosphate acyltransferase"
660	Cthe_0714	2085	20219	22344	13634	12678	14055	14567	"Bifunctional 4-hydroxy-3-methylbut-2-enyl diphosphate reductase/30S ribosomal protein S1"
661	Cthe_0715	375	2789	2977	1914	1788	681	623	"S-adenosylmethionine decarboxylase proenzyme"
662	Cthe_0716	411	404	345	1640	1735	408	466	"Nucleoside-diphosphate kinase"
663	Cthe_0717	783	1280	1356	2925	3244	1242	1133	"Glutamate O-methyltransferase CheR"
664	Cthe_0718	288	12	10	43	48	26	22	"Hypothetical protein"
665	Cthe_0719	432	1187	1345	11063	10034	522	578	"Transcriptional regulator, BadM/Rrf2 family"
666	Cthe_0720	1185	13662	15462	24808	25672	7023	6578	"Cysteine desulfurase NifS"
667	Cthe_0721	450	5145	4966	7050	7200	2290	2088	"Fe-S cluster assembly scaffold protein NifU"
668	Cthe_0722	1080	5380	5478	12657	14034	3558	3744	"tRNA 2-thiouridine(34) synthase MnmA"
669	Cthe_0723	1227	3556	3870	4313	4672	1378	1144	"Tyrosyl-tRNA synthetase"
670	Cthe_0724	798	1088	1355	795	721	225	200	"Histidinol phosphate phosphatase HisJ family"
671	Cthe_0725	1497	6573	6423	26945	28732	3790	3543	"DUF3369 domain-containing protein"
672	Cthe_0726	1503	1959	2255	6440	6667	4290	4006	"M18 family aminopeptidase"
673	Cthe_0727	927	3419	3672	1900	2004	881	822	"Cell envelope-associated transcriptional attenuator LytR-CpsA-Psr"
674	Cthe_0728	993	778	835	399	356	305	321	"Tyrosine recombinase XerC"
675	Cthe_0729	1614	1302	1453	1057	1367	129	103	"Dockerin type 1 cellulosome"
676	Cthe_0730	684	1553	1776	1976	2144	387	325	"DUF4956 domain-containing protein"
677	Cthe_0731	513	1889	2004	1564	1456	619	578	"Shikimate kinase"
678	Cthe_0732	1185	14049	16734	12660	10345	10232	8993	"Chorismate synthase"
679	Cthe_0733	657	982	1233	4749	4955	540	512	"Type IV pilus assembly PilZ"
680	Cthe_0734	1122	3417	3666	6153	6234	1564	1231	"Peptidoglycan DD-metalloendopeptidase family protein"
681	Cthe_0735	807	2300	2444	726	789	624	611	"Cellulosome anchoring protein cohesin region"
682	Cthe_0736	3918	1569	1354	4831	4538	1805	1978	"Cellulosome anchoring protein cohesin region"
683	Cthe_0737	630	1296	1456	6954	7123	5243	5528	"4'-phosphopantetheinyl transferase"
684	Cthe_0738	213	245	213	272	299	265	222	"Copper ion binding protein"
685	Cthe_0739	1725	1603	1522	3780	3822	3196	3378	"PQQ-like beta-propeller repeat protein"
686	Cthe_0740	738	2514	2678	3864	3699	1263	1058	"Transcriptional regulator, GntR family"
687	Cthe_0741	1428	5287	5554	5637	5834	3848	3740	"Adenylosuccinate lyase"
688	Cthe_0742	411	392	310	669	702	672	614	"Hypothetical protein"
689	Cthe_0743	1455	5294	5006	7553	7774	6202	6423	"MATE family efflux transporter"
690	Cthe_0744	2853	1394	1177	1668	1752	1312	1489	"DUF5050 domain-containing protein"
691	Cthe_0745	2193	2458	2677	1648	1466	1036	890	"Glycoside hydrolase family 9, CelW"
692	Cthe_0746	609	2869	3006	125	104	339	378	"Peptidase S7 flavivirus helicase (NS3)"
693	Cthe_0747	1065	5599	5378	139	122	404	356	"Extracellular solute-binding protein family 1"
694	Cthe_0748	795	3904	4123	184	203	421	478	"Binding-protein-dependent transport systems inner membrane component"
695	Cthe_0749	828	2779	2543	169	123	293	245	"Binding-protein-dependent transport systems inner membrane component"
696	Cthe_0750	1059	3943	3649	279	215	594	533	"Spermidine/putrescine ABC transporter ATPase subunit"
697	Cthe_0751	540	725	689	38	31	9	13	"Cupin domain-containing protein"
698	Cthe_0752	240	17	26	21	27	8	12	"Hypothetical protein"
699	Cthe_0753	576	391	425	683	721	213	256	"Hypothetical protein"
700	Cthe_0754	834	146	178	705	756	209	189	"Hypothetical protein"
701	Cthe_0755	1188	3575	3789	15196	17745	2116	1988	"Pyridoxal phosphate-dependent aminotransferase"
702	Cthe_0756	936	1056	1256	1806	1987	465	413	"Membrane dipeptidase"
703	Cthe_0757	672	1117	1247	1737	1994	632	610	"DNA repair protein RadC"
704	Cthe_0758	393	962	1023	578	523	667	600	"Predicted endonuclease distantly related to archaeal Holliday junction resolvase"
705	Cthe_0759	285	724	834	780	888	967	1034	"Type III secretion exporter"
706	Cthe_0760	1635	5047	5342	6943	7120	3784	3567	"Flagellar hook-length control protein FliK"
707	Cthe_0761	771	2597	2366	3153	3356	2513	2677	"Ribonuclease H"
708	Cthe_0762	654	3695	3840	1826	1749	1493	1345	"Lactate utilization protein"
709	Cthe_0763	876	13363	14556	7289	7088	7960	8122	"Ribosome biogenesis GTPase, YlqF"
710	Cthe_0764	666	8476	8789	6713	6523	4886	4655	"Signal peptidase"
711	Cthe_0765	345	23413	24850	11694	10034	6923	6575	"50S ribosomal protein L19"
712	Cthe_0766	744	16957	18502	2747	2845	2434	2677	"tRNA (guanine-N1)-methyltransferase, trmD"
713	Cthe_0767	525	6685	6477	903	1230	1635	1549	"16S rRNA processing protein RimM"
714	Cthe_0768	231	102844	123798	4853	5005	6321	6123	"KH domain-containing protein"
715	Cthe_0769	246	5591	5234	238	211	460	489	"30S ribosomal protein S16"
716	Cthe_0770	1341	66723	67843	12938	12650	7440	7123	"Signal recognition particle protein"
717	Cthe_0771	354	80453	83456	18334	19456	9067	11235	"YlxM family DNA-binding protein"
718	Cthe_0772	288	1674	1845	19600	20346	1641	1765	"LysM peptidoglycan-binding domain-containing protein"
719	Cthe_0773	642	2464	2678	15223	16778	11247	13488	"Transcriptional repressor, LexA"
720	Cthe_0774	249	3382	3567	1201	1045	1962	1650	"RNA chaperone Hfq"
721	Cthe_0775	942	2576	2778	2714	2349	2009	2457	"tRNA delta(2)-isopentenylpyrophosphate transferase"
722	Cthe_0776	2268	3486	3568	3664	3247	3029	3267	"DNA mismatch repair protein MutL"
723	Cthe_0777	2613	9162	9568	5331	5123	5245	5022	"DNA mismatch repair protein MutS"
724	Cthe_0778	393	5375	5732	4388	4122	3072	2879	"YlbF family regulator"
725	Cthe_0779	1353	1151	1345	1106	1003	507	478	"Copper amine oxidase"
726	Cthe_0780	684	636	612	761	789	674	598	"HAD-superfamily hydrolase, subfamily IA, variant 3"
727	Cthe_0781	489	219	203	380	399	207	180	"GCN5-related N-acetyltransferase"
728	Cthe_0783	1443	4605	4870	1616	1834	3290	3023	"tRNA (N6-isopentenyl adenosine(37)-C2)-methylthiotransferase MiaB"
729	Cthe_0784	876	5279	5349	1957	2133	2552	2344	"Orotate phosphoribosyltransferase"
730	Cthe_0785	303	111	167	309	350	19	24	"Hypothetical protein"
731	Cthe_0786	1083	9218	9533	3427	3640	1070	1155	"3-dehydroquinate synthase"
732	Cthe_0787	2796	22747	21450	8888	8231	11080	10236	"Isoleucine-tRNA ligase"
733	Cthe_0788	465	590	522	834	879	1356	1544	"DivIVA domain-containing protein"
734	Cthe_0789	792	1317	1222	2518	2734	3718	3844	"RNA-binding protein S4"
735	Cthe_0790	285	561	588	734	766	167	120	"YggT family protein"
736	Cthe_0791	468	3652	3944	4468	4509	1185	1056	"Cell division protein SepF"
737	Cthe_0792	705	1568	1777	330	309	839	812	"YggS family pyridoxal phosphate-dependent enzyme"
738	Cthe_0793	1269	6853	6534	1945	1723	2121	2346	"Hypothetical protein"
739	Cthe_0794	1293	3802	4123	1789	1875	2488	2534	"Methionine gamma-lyase family protein"
740	Cthe_0795	1728	1103	1009	1892	1978	1006	1134	"Alpha amylase catalytic region"
741	Cthe_0797	2445	3061	3256	789	723	208	245	"Glycoside hydrolase family 5, acetylxylan esterase / 6-O-glycoside deacetylase, CelE"
742	Cthe_0798	1587	965	1133	2442	2678	2149	2245	"Lipase"
743	Cthe_0799	678	762	712	2539	2734	920	888	"Response regulator transcription factor"
744	Cthe_0800	1212	297	234	948	1099	636	612	"Two-component sensor histidine kinase"
745	Cthe_0801	1224	394	404	1200	1356	926	1009	"IS256 family transposase"
746	Cthe_0802	288	75	62	319	366	73	88	"Hypothetical protein"
747	Cthe_0803	957	1019	980	2993	3122	1056	1099	"Pseudouridine synthase, RluA family"
748	Cthe_0804	573	92	87	883	923	176	145	"Transcriptional regulator, MerR family"
749	Cthe_0805	411	19	23	28	30	14	17	"Response regulator receiver protein"
750	Cthe_0806	2709	114	145	89	77	170	185	"PAS domain S-box protein"
751	Cthe_0807	1044	49	53	158	168	22	27	"Response regulator receiver modulated CheB methylesterase"
752	Cthe_0808	819	8	12	37	41	18	22	"MCP methyltransferase, CheR-type"
753	Cthe_0809	492	8	10	45	51	11	14	"Purine-binding chemotaxis protein CheW"
754	Cthe_0810	2148	41	46	351	388	46	52	"CheA signal transduction histidine kinase"
755	Cthe_0811	354	10	13	61	67	7	11	"Response regulator receiver protein"
756	Cthe_0812	810	245	278	295	312	31	37	"Sporulation transcriptional activator Spo0A"
757	Cthe_0813	1341	573	589	297	335	184	167	"SpolVB peptidase"
758	Cthe_0814	1713	13746	14678	2979	3123	13903	13245	"DNA repair protein RecN"
759	Cthe_0815	462	2696	2877	977	1009	4089	4235	"Arginine repressor"
760	Cthe_0816	870	13230	13750	9127	8970	16997	16123	"NAD(+)/NADH kinase"
761	Cthe_0817	5481	59	53	177	189	83	94	"Diguanylate cyclase"
762	Cthe_0818	675	1198	1289	437	489	465	412	"Hypothetical protein"
763	Cthe_0819	864	3139	3048	579	510	575	610	"ABC-type multidrug transport system, ATPase component"
764	Cthe_0820	2013	2767	2988	1337	1534	1980	2122	"Hypothetical protein"
765	Cthe_0821	1677	32044	33000	38451	41235	35236	32776	"Cellulase family glycosylhydrolase"
766	Cthe_0824	1776	811	698	2418	2541	1666	1873	"Copper amine oxidase"
767	Cthe_0825	1950	1655	1765	2092	2244	1305	1246	"Glycoside hydrolase family 9, endoglucanase"
768	Cthe_0826	786	1129	1366	967	923	762	789	"Hypothetical protein"
769	Cthe_0827	813	1113	1230	1526	1677	1202	1245	"TlyA family RNA methyltransferase"
770	Cthe_0828	1884	3421	3368	6780	6872	3264	3000	"1-deoxy-D-xylulose-5-phosphate synthase"
771	Cthe_0829	729	1033	1230	2887	3120	1154	1246	"Mg2+ and Co2+ transporter CorB"
772	Cthe_0830	447	747	888	419	445	970	1120	"Divergent PAP2 family protein"
773	Cthe_0831	888	2527	2672	1147	1258	3879	4005	"Polyprenyl synthetase"
774	Cthe_0832	243	364	387	113	101	542	578	"Exodeoxyribonuclease VII, small subunit"
775	Cthe_0833	1236	10118	12310	4769	4872	9218	9456	"Exodeoxyribonuclease VII, large subunit"
776	Cthe_0834	438	7748	7982	3572	3345	7791	8120	"Transcription antitermination factor NusB"
777	Cthe_0835	255	633	689	840	920	77	135	"Protein of unknown function DUF2273"
778	Cthe_0836	549	1451	1523	4298	4452	2356	2569	"Alkaline shock response membrane anchor protein AmaP"
779	Cthe_0837	405	11897	13566	2611	2845	4878	5121	"Asp23/Gls24 family envolope stress response protein"
780	Cthe_0838	648	111	130	34	41	25	30	"SpoIIIAH-like family protein"
781	Cthe_0839	624	22	26	28	30	19	24	"Stage III sporulation protein AG"
782	Cthe_0840	633	70	88	16	23	33	37	"Stage III sporulation protein AF"
783	Cthe_0841	1230	17	21	31	26	31	25	"Stage III sporulation protein AE"
784	Cthe_0842	390	19	23	15	19	12	18	"Stage III sporulation protein AD"
785	Cthe_0844	522	7	10	14	18	23	27	"Stage III sporulation protein AB"
786	Cthe_0845	1011	57	65	48	54	35	39	"Stage III sporulation protein AA"
787	Cthe_0846	411	1437	1642	350	378	215	256	"Hypothetical protein"
788	Cthe_0847	558	12690	13241	5481	5321	4449	4222	"Translation elongation factor P"
789	Cthe_0848	1080	1215	1430	510	489	691	712	"Peptidase M24"
790	Cthe_0849	429	707	823	149	188	286	299	"3-dehydroquinate dehydratase, type II"
791	Cthe_0850	856	1156	1034	794	745	895	935	"Endonuclease IV"
792	Cthe_0851	267	111	132	157	187	283	310	"Late competence development protein ComFB"
793	Cthe_0852	846	962	1023	1487	1578	1481	1677	"Prepilin peptidase"
794	Cthe_0853	1686	888	967	751	823	572	599	"Type II secretion system protein E"
795	Cthe_0854	897	1035	1089	1463	1672	873	999	"Shikimate 5-dehydrogenase"
796	Cthe_0855	504	1479	1372	1169	1007	1117	1450	"HAD superfamily (subfamily IIIA) phosphatase, TIGR01668"
797	Cthe_0856	1071	3664	3456	3741	3897	5273	5432	"Branched-chain amino acid aminotransferase"
798	Cthe_0857	492	733	900	2632	2873	3416	3623	"Hypothetical protein"
799	Cthe_0858	990	1233	1098	3390	3604	3988	4233	"Flotillin-like protein FloA"
800	Cthe_0859	546	765	704	2549	2678	2097	2345	"Hypothetical protein"
801	Cthe_0860	594	2244	2130	1427	1345	959	870	"Rubrerythrin"
802	Cthe_0861	1137	3537	3890	11269	10034	3729	3633	"LCP family protein"
803	Cthe_0862	321	1151	980	4909	5124	2003	2234	"Hypothetical protein"
804	Cthe_0863	2118	6403	6123	12641	13450	6502	6252	"Glutamine synthetase"
805	Cthe_0864	540	6229	5890	6309	6123	4395	4589	"2-oxoglutarate ferredoxin oxidoreductase subunit gamma"
806	Cthe_0865	747	13284	14235	7534	7789	9777	9987	"MFS transporter"
807	Cthe_0866	1041	12447	13245	4210	4120	6774	6890	"Pyruvate flavodoxin/ferredoxin oxidoreductase domain protein"
808	Cthe_0867	207	636	723	304	279	369	402	"4Fe-4S dicluster domain-containing protein"
809	Cthe_0868	711	6205	6450	2662	2367	4514	4750	"Type IV pilus assembly PilZ"
810	Cthe_0869	669	2417	2980	1752	1540	2792	3004	"Hypothetical protein"
811	Cthe_0870	588	6649	6949	4889	5003	2744	2880	"Flavodoxin family protein"
812	Cthe_0871	657	2836	2751	503	470	781	823	"Phosphoribosylanthranilate isomerase"
813	Cthe_0872	783	2235	2452	827	799	1189	1067	"Indole-3-glycerol-phosphate synthase"
814	Cthe_0873	1038	5143	5344	1794	1630	2700	2560	"Anthranilate phosphoribosyltransferase"
815	Cthe_0874	606	1382	1566	1691	1870	1389	1230	"Glutamine amidotransferase of anthranilate synthase"
816	Cthe_0875	1485	5079	4790	12055	12677	4319	4140	"Anthranilate synthase component I"
817	Cthe_0876	1293	509	634	1793	1967	1956	2122	"Glycosyl transferase"
818	Cthe_0877	1095	3702	3990	4220	4423	4622	4528	"GTP-dependent nucleic acid-binding protein EngD"
819	Cthe_0878	579	7299	7079	19190	20533	11777	12348	"Purine-binding chemotaxis protein CheW"
820	Cthe_0880	1017	6546	5987	7049	6872	1366	1690	"3-deoxy-D-arabinoheptulosonate-7-phosphate synthase"
821	Cthe_0881	1131	641	702	1903	2120	598	620	"GGDEF domain-containing protein"
822	Cthe_0882	891	390	450	291	321	157	220	"DMT family transporter"
823	Cthe_0883	420	183	198	1004	1321	407	438	"Flagellar protein"
824	Cthe_0884	567	599	576	183	204	339	378	"Lytic transglycosylase domain-containing protein"
825	Cthe_0885	588	1011	1230	231	212	448	480	"Dephospho-CoA kinase"
826	Cthe_0886	2685	3503	3770	1719	1890	1288	1204	"DNA polymerase I, polA"
827	Cthe_0887	213	828	915	399	424	376	399	"Hypothetical protein"
828	Cthe_0888	702	3292	3590	844	930	1970	2245	"Type IV pilus assembly PilZ"
829	Cthe_0889	990	2547	2873	1131	1245	707	679	"Putative transmembrane anti-sigma factor"
830	Cthe_0890	663	1061	1238	272	345	509	588	"RNA polymerase, sigma-24 subunit, ECF subfamily"
831	Cthe_0891	444	957	1324	383	412	372	345	"Response regulator receiver protein"
832	Cthe_0892	1107	1842	2034	1283	1034	851	782	"Nif3-like dinuclear metal center hexameric protein"
833	Cthe_0893	705	1371	1543	3965	4356	668	800	"SAM-dependent methyltransferases"
834	Cthe_0894	219	633	789	83	109	101	132	"Rubrerythrin"
835	Cthe_0895	1077	16402	18765	4170	5221	3824	4123	"RNA polymerase, sigma 70 subunit, RpoD subfamily"
836	Cthe_0896	1803	13836	14578	4239	4422	3344	3654	"DNA primase"
837	Cthe_0897	996	333	450	276	315	103	177	"Deoxyguanosinetriphosphate triphosphohydrolase"
838	Cthe_0898	1038	433	412	499	535	940	1122	"HD-GYP domain-containing protein"
839	Cthe_0899	273	218	254	460	487	643	699	"Hypothetical protein"
840	Cthe_0900	381	5280	5433	3974	4235	5262	5578	"Aspartate 1-decarboxylase"
841	Cthe_0901	846	7173	7456	6303	6190	5704	5922	"Pantoate-beta-alanine ligase"
842	Cthe_0902	852	3161	2879	4577	4879	5254	5488	"3-methyl-2-oxobutanoate hydroxymethyltransferase"
843	Cthe_0903	957	5405	5678	3459	3245	4974	5348	"Protein translocase subunit secF"
844	Cthe_0904	1338	10771	12389	3649	3443	5501	5711	"Protein translocase subunit SecD"
845	Cthe_0905	666	3570	3875	3649	3455	2041	1980	"HD domain-containing protein"
846	Cthe_0906	1353	6035	6329	2119	1980	3660	3422	"Radical SAM domain protein"
847	Cthe_0908	912	1281	1378	838	777	988	1023	"RluA family pseudouridine synthase"
848	Cthe_0909	456	387	325	599	623	551	590	"Lipoprotein signal peptidase"
849	Cthe_0910	1668	3882	3678	2834	2673	4169	4348	"Extracellular solute-binding protein family 5"
850	Cthe_0911	840	6440	6577	3364	3451	4393	5000	"Peptidoglycan editing factor PgeF"
851	Cthe_0912	3234	6431	6123	6591	6077	3146	2800	"Glycoside hydrolase family 10, xylanase Y"
852	Cthe_0914	2553	3050	2780	5038	5230	4033	4239	"Protein of unknown function DUF2339"
853	Cthe_0915	1203	626	870	1951	2134	2768	3044	"Hypothetical protein"
854	Cthe_0916	885	1034	1490	4817	5028	1779	1890	"Hypothetical protein"
855	Cthe_0917	1743	5373	5678	4278	4012	3467	3768	"Glutaminyl-tRNA synthetase"
856	Cthe_0918	3630	4073	4321	2976	2765	1825	1982	"Dockerin type 1 cellulosome"
857	Cthe_0922	1005	2435	2213	1012	899	394	345	"Diaminopimelate dehydrogenase"
858	Cthe_0923	774	221	289	197	243	258	289	"Hypothetical protein"
859	Cthe_0924	714	209	270	174	206	108	145	"Hypothetical protein"
860	Cthe_0925	648	673	710	480	512	182	221	"YdcF family protein"
861	Cthe_0926	909	1700	1820	626	688	533	605	"Signal recognition particle-docking protein FtsY"
862	Cthe_0927	3573	7026	6801	2948	3200	1680	1739	"Chromosome segregation protein SMC"
863	Cthe_0928	1023	240	255	210	217	129	156	"4-hydroxythreonine-4-phosphate dehydrogenase PdxA"
864	Cthe_0929	261	5588	5877	759	910	1581	1733	"Stage V sporulation protein S"
865	Cthe_0930	1017	2611	2876	1090	1123	1952	2144	"Radical SAM protein"
866	Cthe_0931	711	2498	2672	693	770	1985	2100	"Ribonuclease III"
867	Cthe_0932	1236	10180	12343	6747	6899	13497	14358	"Beta-ketoacyl-ACP synthase II"
868	Cthe_0933	225	1300	1450	1520	1780	4584	4879	"Acyl carrier protein"
869	Cthe_0934	744	3284	3344	2776	2562	7137	8500	"3-oxoacyl-(acyl-carrier-protein) reductase"
870	Cthe_0935	936	5093	5461	3052	3245	11080	13455	"[Acyl-carrier-protein] S-malonyltransferase"
871	Cthe_0936	996	6252	6024	4893	5006	13638	14566	"3-oxoacyl-(acyl-carrier-protein) synthase III"
872	Cthe_0937	1020	8889	8635	10009	11237	19201	22456	"Phosphate:acyl-[acyl carrier protein] acyltransferase
873	Cthe_0938	567	5175	5349	13278	14578	18603	20345	"Fatty acid biosynthesis transcriptional regulator"
874	Cthe_0939	501	66	74	98	123	122	143	"Hypothetical protein"
875	Cthe_0940	441	32	35	17	20	19	26	"Hypothetical protein"
876	Cthe_0941	618	1147	1233	796	823	1896	1988	"CDP-diacylglycerol-glycerol-3-phosphate 3-phosphatidyltransferase"
877	Cthe_0942	1362	3095	2899	2666	2876	4483	4760	"MiaB-like tRNA modifying enzyme YliG"
878	Cthe_0943	252	84	89	64	77	66	61	"Hypothetical protein"
879	Cthe_0944	1452	1515	1890	749	712	1104	1256	"AAA family ATPase"
880	Cthe_0945	993	1209	1456	1284	1354	1479	1672	"Metallophosphoesterase"
881	Cthe_0946	702	1801	1998	881	700	1284	1349	"Phosphoglycerate mutase"
882	Cthe_0947	924	411	534	145	166	523	657	"Dihydroorotate dehydrogenase"
883	Cthe_0948	786	638	700	285	321	831	902	"Dihydroorotate dehydrogenase, electron transfer subunit"
884	Cthe_0949	3219	1744	2943	1534	1678	5731	5912	"Carbamoyl-phosphate synthase, large subunit"
885	Cthe_0950	1074	654	772	460	485	3133	3344	"Carbamoyl-phosphate synthase, small subunit"
886	Cthe_0951	945	630	834	224	288	2754	2980	"Orotidine 5'-phosphate decarboxylase"
887	Cthe_0952	1281	945	1126	1149	1356	7648	7899	"Dihydroorotase, multifunctional complex type"
888	Cthe_0953	939	167	220	283	324	3661	3870	"Aspartate carbamoyltransferase catalytic subunit"
889	Cthe_0954	555	5431	5321	3067	3127	8040	8435	"Bifunctional pyr operon transcriptional regulator/uracil phosphoribosyltransferase PyrR"
890	Cthe_0955	411	184	203	164	177	103	145	"TIGR04086 family membrane protein"
891	Cthe_0956	474	16	25	17	25	19	24	"Hypothetical protein"
892	Cthe_0957	300	2652	2854	1383	1432	1751	1699	"Preprotein translocase, YajC subunit"
893	Cthe_0958	1125	7642	7321	1245	1366	1829	1650	"tRNA guanosine(34) transglycosylase Tgt"
894	Cthe_0959	1026	10173	12356	3118	3568	4345	4652	"tRNA preQ1(34) S-adenosylmethionine ribosyltransferase-isomerase QueA"
895	Cthe_0960	1713	2332	2543	1386	1456	300	316	"SpoIID/LytB domain-containing protein"
896	Cthe_0961	999	7687	7890	20209	21390	23796	21389	"Aspartate-semialdehyde dehydrogenase"
897	Cthe_0962	879	2592	2789	7281	7450	10877	12384	"Dihydrodipicolinate synthase"
898	Cthe_0963	759	6042	6345	17779	19870	20965	21345	"Dihydrodipicolinate reductase"
899	Cthe_0964	459	1516	1890	4729	4987	4281	4456	"Hypothetical protein"
900	Cthe_0965	531	1445	1678	532	678	1724	1879	"Cob(I)yrinic acid a,c-diamide adenosyltransferase"
901	Cthe_0966	435	17	23	358	388	67	75	"Copper amine oxidase-like domain-containing protein"
902	Cthe_0968	2121	188	223	1553	1764	121	145	"ATP-dependent helicase"
903	Cthe_0972	609	138	146	161	179	211	245	"Hypothetical protein"
904	Cthe_0974	1110	3028	3345	1950	2133	1050	1156	"Undecaprenyldiphospho-muramoylpentapeptide beta-N- acetylglucosaminyltransferase"
905	Cthe_0975	1152	316	356	421	467	413	467	"Stage V sporulation protein E"
906	Cthe_0976	993	870	923	705	734	794	834	"Phospho-N-acetylmuramoyl-pentapeptide-transferase"
907	Cthe_0977	1374	3585	3745	1363	1543	1135	1238	"UDP-N-acetylmuramoyl-tripeptide--D-alanyl-D- alanine ligase"
908	Cthe_0978	1458	2664	2800	1558	1588	1240	1342	"UDP-N-acetylmuramoyl-L-alanyl-D-glutamate--2,6-diaminopimelate ligase"
909	Cthe_0979	2172	4704	4870	6558	6896	2913	3214	"PASTA domain-containing protein"
910	Cthe_0980	489	3395	3567	10703	11245	2613	2689	"Cell division protein FtsL"
911	Cthe_0981	942	26104	26800	36764	38798	18604	17234	"16S rRNA (cytosine(1402)-N(4))-methyltransferase RsmH"
912	Cthe_0982	432	8930	8657	21650	22345	6346	6544	"Division/cell wall cluster transcriptional repressor MraZ"
913	Cthe_0983	1131	4225	4478	5124	5342	1295	1377	"Rod shape-determining protein RodA"
914	Cthe_0984	963	2125	2345	984	1089	1180	1253	"Prolipoprotein diacylglyceryl transferase"
915	Cthe_0985	1284	1629	1823	776	710	1687	1823	"Peptidase M16 domain protein"
916	Cthe_0986	1293	3085	3156	1578	1789	1823	2001	"Peptidase M16 domain protein"
917	Cthe_0987	939	4886	5129	1971	1877	3172	3300	"Bifunctional riboflavin kinase/FAD synthetase"
918	Cthe_0988	894	5168	5234	1491	1688	3545	3699	"tRNA pseudouridine synthase, TruB"
919	Cthe_0989	957	7809	8233	2280	2434	6158	6311	"Bifunctional oligoribonuclease/PAP phosphatase NrnA"
920	Cthe_0990	372	5899	6022	1344	1488	3532	3765	"30S ribosome-binding factor RbfA"
921	Cthe_0991	3108	32212	31578	8585	7689	19554	20879	"Translation initiation factor IF-2"
922	Cthe_0992	354	6579	6890	426	510	2184	2345	"50S ribosomal protein L7ae"
923	Cthe_0993	279	1427	1622	288	333	725	834	"YlxR family protein"
924	Cthe_0994	1215	21002	23458	13284	13700	13103	14359	"Transcription termination/antitermination protein NusA"
925	Cthe_0995	465	7881	8123	5575	5866	3504	3620	"Ribosome maturation factor RimP"
926	Cthe_0996	4329	5984	6237	2375	2541	3866	4022	"PolC-type DNA polymerase III"
927	Cthe_0997	1059	3692	3820	754	834	1829	2005	"Flavodoxin-dependent (E)-4-hydroxy-3-methylbut-2-enyl-diphosphate synthase"
928	Cthe_0998	1275	1752	1920	1570	1688	1944	2122	"RIP metalloprotease RseP"
929	Cthe_0999	1146	1433	1522	1796	1866	1965	2177	"1-deoxy-D-xylulose 5-phosphate reductoisomerase"
930	Cthe_1000	837	2340	2572	2601	2731	3093	3345	"Phosphatidate cytidylyltransferase"
931	Cthe_1001	759	4237	4321	6616	6788	4193	4355	"Isoprenyl transferase"
932	Cthe_1002	201	124	155	95	128	55	67	"Hypothetical protein"
933	Cthe_1003	552	1879	2001	740	860	2152	2345	"Ribosome recycling factor"
934	Cthe_1004	708	4238	4466	452	488	2547	2780	"UMP kinase"
935	Cthe_1005	648	9430	9688	2480	2671	4736	4877	"Translation elongation factor Ts"
936	Cthe_1006	759	6349	6522	4533	4777	2986	3120	"30S Ribosomal protein S2"
937	Cthe_1007	1845	3657	3833	4916	5122	2225	2433	"Translational GTPase TypA"
938	Cthe_1008	1122	6573	6891	9225	9555	4368	4630	"Endolytic transglycosylase MltG"
939	Cthe_1009	639	172	189	654	772	427	467	"O-methyltransferase"
940	Cthe_1010	1236	1802	1967	3297	3452	1553	1677	"Peptidase U32"
941	Cthe_1011	1656	219	266	582	643	244	290	"Peptidoglycan glycosyltransferase"
942	Cthe_1012	711	25	31	123	166	58	69	"RNA polymerase sporulation sigma factor SigK"
943	Cthe_1013	1083	162	188	256	305	135	177	"Sporulation integral membrane protein YtvI"
944	Cthe_1014	2382	9802	10034	5758	5982	4671	4821	"Endonuclease MutS2"
945	Cthe_1015	423	304	367	605	655	223	289	"DUF3842 family protein"
946	Cthe_1016	1059	2549	2780	1762	1920	1031	1088	"N-acetylmuramoyl-L-alanine amidase"
947	Cthe_1017	303	132	190	2364	2532	114	156	"Hypothetical protein"
948	Cthe_1018	870	15932	17236	31357	33200	23434	24122	"Sugar ABC transporter, permease protein (msdB2)"
949	Cthe_1019	984	11933	12532	35378	37202	17856	18456	"Transmembrane sugar transport protein (msdB1)"
950	Cthe_1020	1380	141007	137345	249045	250765	124694	121378	"Periplasmic sugar-binding protein CbpB (cellobiose, cellotriose, cellotetraose, cellopentaose)"
951	Cthe_1021	1479	278	300	195	203	109	134	"Stage IV sporulation protein A"
952	Cthe_1022	1020	4391	4572	2532	2637	2497	2789	"NAD(P)H-dependent glycerol-3-phosphate dehydrogenase"
953	Cthe_1023	660	1150	1346	1508	1634	1729	1980	"Glycerol-3-phosphate 1-O-acyltransferase PlsY"
954	Cthe_1024	1323	8830	9122	3565	3745	3913	4228	"Ribosome biogenesis GTPase Der"
955	Cthe_1025	1338	5679	5980	4856	5003	4034	4321	"Fe-S oxidoreductase, related to NifB/MoaA family"
956	Cthe_1026	201	14714	15167	3401	3623	4238	4455	"50S ribosomal protein L32"
957	Cthe_1027	504	33412	34879	40715	38934	12324	10235	"DUF177 domain-containing protein"
958	Cthe_1028	1200	2956	3234	3798	4004	3145	3455	"Acetate kinase"
959	Cthe_1029	1077	3255	3120	7221	7435	6640	6890	"Phosphate acetyltransferase"
960	Cthe_1030	825	499	567	242	278	440	480	"Tetratricopeptide repeat (TPR) protein"
961	Cthe_1031	1434	1643	1923	837	924	1039	1230	"Asp-tRNA(Asn)/Glu-tRNA(Gln) amidotransferase subunit GatB"
962	Cthe_1032	1461	1342	1459	1477	1588	1080	1145	"Asp-tRNA(Asn)/Glu-tRNA(Gln) amidotransferase subunit GatA"
963	Cthe_1033	288	311	288	603	680	270	213	"Asp-tRNA(Asn)/Glu-tRNA(Gln) amidotransferase subunit GatC"
964	Cthe_1034	558	1512	1345	1768	1899	1841	1945	"Hypothetical protein"
965	Cthe_1035	1992	3066	3344	1811	2004	960	1001	"NAD-dependent DNA ligase LigA"
966	Cthe_1036	696	854	915	983	1008	453	410	"M50 family metallopeptidase"
967	Cthe_1037	849	3996	4120	5445	5527	1821	2000	"N-acetylmuramoyl-L-alanine amidase"
968	Cthe_1038	1026	47	43	97	102	66	62	"Spore protease"
969	Cthe_1039	348	34562	36780	19272	18972	3212	3002	"Ribosomal protein S20"
970	Cthe_1040	1029	2425	2555	3579	3742	1625	1782	"DNA polymerase III delta subunit"
971	Cthe_1041	1401	3049	3268	19840	21456	15694	16780	"UDP-N-acetylmuramoyl-L-alanyl-D-glutamate synthetase"
972	Cthe_1042	540	5455	5780	25840	27850	10140	12340	"Hypothetical protein"
973	Cthe_1043	246	366	422	1319	1456	148	199	"Hypothetical protein"
974	Cthe_1044	330	254	200	1389	1123	173	134	"Hypothetical protein"
975	Cthe_1045	327	20	25	378	423	80	93	"Hypothetical protein"
976	Cthe_1046	1341	252	307	918	1023	631	750	"Multiple sugar transport system substrate-binding protein"
977	Cthe_1047	546	2064	2138	4362	4532	2169	2000	"Hypothetical protein"
978	Cthe_1048	1536	2750	2358	5245	5012	5867	6008	"Rhomboid family intramembrane serine protease"
979	Cthe_1049	621	1525	1378	3243	3112	2917	3248	"Regulatory protein RecX"
980	Cthe_1050	1050	49178	52345	44321	46375	47160	46032	"RecA protein"
981	Cthe_1051	1578	819	950	940	1102	785	870	"Murein biosynthesis integral membrane protein MurJ"
982	Cthe_1052	1242	2354	2213	3052	3166	1909	2111	"Competence/damage-inducible protein CinA"
983	Cthe_1053	954	344	302	679	723	623	689	"L-lactate dehydrogenase"
984	Cthe_1054	957	935	879	2295	2019	2449	2288	"MoxR family ATPase"
985	Cthe_1055	1209	226	256	1587	1766	1026	1388	"DUF58 domain-containing protein"
986	Cthe_1056	2673	1809	1967	6287	6671	2980	2782	"DUF4129 domain-containing protein"
987	Cthe_1057	195	89	122	491	599	402	479	"Phage shock protein C, PspC"
988	Cthe_1058	1239	13782	11376	10580	11348	5072	4870	"Serine hydroxymethyltransferase "
989	Cthe_1060	984	12095	14056	4875	5003	6133	6722	"AIR synthase"
990	Cthe_1061	687	3252	3450	9680	10093	3993	4288	"DUF2225 domain-containing protein"
991	Cthe_1062	1446	19864	17890	34009	33451	16625	15623	"VanW family protein"
992	Cthe_1063	1179	2231	2456	1610	1750	1859	1988	"tRNA 4-thiouridine(8) synthase ThiI"
993	Cthe_1064	1164	3034	3245	3320	3458	2481	2673	"Cysteine desulfurase"
994	Cthe_1065	663	452	577	3355	3523	1601	1688	"Type IV pilus assembly PilZ"
995	Cthe_1066	756	229	255	247	289	155	202	"DNA replication and repair protein RecO"
996	Cthe_1067	894	936	1123	1564	1789	1216	1324	"GTPase Era"
997	Cthe_1068	387	229	202	480	450	123	101	"Cytidine deaminase"
998	Cthe_1069	489	1354	1478	1642	1752	1128	1234	"Predicted metal-dependent hydrolase"
999	Cthe_1070	2202	3231	3355	4079	4359	3830	4005	"HDIG domain-containing protein"
1000	Cthe_1071	1002	6012	5872	6179	6488	5421	5721	"Phosphate starvation-inducible protein PhoH, predicted ATPase"
1001	Cthe_1072	1197	5376	5122	7574	7783	6119	6322	"Sporulation protein YqfD"
1002	Cthe_1073	318	39	33	33	28	52	45	"Sporulation protein YqfC"
1003	Cthe_1074	963	84	77	71	79	86	99	"Polysaccharide deacetylase"
1004	Cthe_1075	702	2789	2592	1792	1877	2069	2231	"Protein of unknown function DUF881"
1005	Cthe_1076	714	2324	2532	1248	1123	1469	1576	"Protein of unknown function DUF881"
1006	Cthe_1077	630	12	15	33	37	11	14	"Hypothetical protein"
1007	Cthe_1078	318	366	312	632	678	126	109	"Hypothetical protein"
1008	Cthe_1079	2463	90	100	133	145	120	168	"Nucleotidyl transferase"
1009	Cthe_1082	258	17	22	20	26	12	17	"Transcription initiation factor IIE (TFIIE) alpha subunit family protein"
1010	Cthe_1083	1050	11	16	18	22	15	20	"Putative homoserine kinase type II (protein kinase fold)-like protein"
1011	Cthe_1084	1038	14	17	14	19	10	15	"Spore coat protein, CotS family"
1012	Cthe_1085	1293	34	39	48	55	29	33	"Glycosyl transferase, group 1"
1013	Cthe_1086	987	25	29	32	35	11	15	"NAD-dependent epimerase/dehydratase family protein"
1014	Cthe_1087	264	20	24	39	46	19	23	"Hypothetical protein"
1015	Cthe_1088	741	223	287	745	823	254	288	"Hypothetical protein"
1016	Cthe_1089	267	1900	1734	4575	4789	4686	4823	"Stage V sporulation protein S"
1017	Cthe_1090	783	15265	13873	7839	7345	14510	15611	"TIGR00282 family metallophosphoesterase"
1018	Cthe_1091	1575	60848	61267	49652	50672	39065	41445	"Metal dependent phosphohydrolase"
1019	Cthe_1092	678	5286	5344	3352	3478	3162	3256	"Hypothetical protein"
1020	Cthe_1093	858	5983	6133	11669	13577	4494	4678	"Bifunctional methylenetetrahydrofolate dehydrogenase/methenyltetrahydrofolate cyclohydrolase FolD"
1021	Cthe_1094	1920	2258	2132	3645	3457	3484	3322	"YgiQ family radical SAM protein"
1022	Cthe_1095	2427	1782	1899	2995	3155	1186	988	"DNA translocase FtsK"
1023	Cthe_1096	225	36	42	69	75	114	145	"Hypothetical protein"
1024	Cthe_1097	774	211	255	256	218	173	189	"Translocation-enhancing protein TepA"
1025	Cthe_1098	1290	5270	5533	3010	3177	5565	5763	"Hypothetical protein"
1026	Cthe_1099	2550	11139	12445	5038	5120	14162	16720	"Hypothetical protein"
1027	Cthe_1100	522	785	823	500	523	287	312	"Type II secretion system protein"
1028	Cthe_1101	1293	11803	9456	3456	3122	9931	9633	"Hypothetical protein"
1029	Cthe_1102	552	1165	1238	666	723	1290	1366	"Fimbrial assembly family protein"
1030	Cthe_1103	567	3620	3745	1933	2231	4900	5129	"Prepilin-type cleavage/methylation"
1031	Cthe_1104	531	9479	9678	5352	5566	6218	6423	"Type II secretion system protein"
1032	Cthe_1105	1215	6937	6723	16124	15678	15978	13567	"Type II secretion system F family protein"
1033	Cthe_1106	1056	4420	4567	7444	7645	5644	5890	"Type IV pilus twitching motility protein PilT"
1034	Cthe_1107	2364	19744	20454	28408	29733	19786	17854	"Type II secretion system protein E"
1035	Cthe_1109	855	137	145	258	288	44	48	"Permease"
1036	Cthe_1110	402	122	156	106	122	52	47	"Arsenate reductase ArsC"
1037	Cthe_1111	1038	39	42	71	79	16	19	"ACR3 family arsenite efflux transporter "
1038	Cthe_1112	399	118	123	114	134	37	43	"Winged helix-turn-helix transcriptional regulator, ArsR"
1039	Cthe_1114	1887	63	77	107	132	55	66	"Tn7-like transposition protein D"
1040	Cthe_1115	1656	37	42	98	105	40	68	"Tn7-like transposition protein C"
1041	Cthe_1116	2166	118	145	358	405	101	182	"DDE-type integrase/transposase/recombinase"
1042	Cthe_1117	846	48	54	133	160	26	31	"TnsA endonuclease"
1043	Cthe_1118	870	2	4	40	33	6	10	"Hypothetical protein"
1044	Cthe_1119	795	239	312	5422	5120	428	478	"Hypothetical protein"
1045	Cthe_1120	375	451	504	6106	5670	395	430	"Transcriptional regulator, XRE family"
1046	Cthe_1121	282	33	36	49	54	39	44	"Hypothetical protein"
1047	Cthe_1123	837	564	612	548	623	305	344	"Domain of unknown function DUF1848"
1048	Cthe_1124	780	1061	1123	1227	1452	450	480	"PhzF family phenazine biosynthesis protein"
1049	Cthe_1125	219	1124	1258	852	780	1216	1433	"Hypothetical protein"
1050	Cthe_1126	474	20	25	34	38	23	27	"Hypothetical protein"
1051	Cthe_1127	906	108	123	117	166	26	29	"Tyrosine-type recombinase/integrase"
1052	Cthe_1128	387	12	15	104	146	44	55	"Hypothetical protein"
1053	Cthe_1131	288	277	305	351	389	232	278	"Hypothetical protein"
1054	Cthe_1132	729	839	923	825	912	581	630	"Protein of unknown function DUF1444"
1055	Cthe_1133	516	3808	3982	3602	3455	1266	1188	"Hypothetical protein"
1056	Cthe_1134	441	26	32	24	29	18	24	"DUF3908 family protein"
1057	Cthe_1135	975	519	577	491	523	224	246	"TIR domain-containing protein"
1058	Cthe_1136	1461	1457	1633	490	523	453	511	"Serine/threonine-protein kinase"
1059	Cthe_1137	642	322	388	103	123	150	188	"Hypothetical protein"
1060	Cthe_1138	1686	2405	2673	792	840	622	678	"HerA-ATP synthase, barrel domain-containing protein"
1061	Cthe_1139	1161	464	544	294	312	272	321	"Hypothetical protein"
1062	Cthe_1140	801	520	556	652	704	293	302	"Hypothetical protein"
1063	Cthe_1141	4062	4711	4923	2878	2645	1330	1124	"Hypothetical protein"
1064	Cthe_1142	1056	1911	2134	1486	1567	878	923	"Hypothetical protein"
1065	Cthe_1143	1056	1677	1734	1732	1872	790	660	"Hypothetical protein"
1066	Cthe_1144	1422	1610	1774	1869	1980	770	670	"Restriction modification system DNA specificity subunit"
1067	Cthe_1145	1887	4873	5055	6675	6872	2591	2784	"N-6 DNA methylase"
1068	Cthe_1146	363	817	956	1037	1234	789	823	"Hypothetical protein"
1069	Cthe_1147	240	781	823	425	543	633	523	"Protein of unknown function DUF2188"
1070	Cthe_1148	1284	3902	4136	10461	12359	7653	8456	"Restriction endonuclease subunit S"
1071	Cthe_1149	345	74	79	77	84	60	72	"Hypothetical protein"
1072	Cthe_1150	1086	351	423	1007	1166	199	223	"Hypothetical protein"
1073	Cthe_1151	1068	1872	1978	1049	1345	854	775	"Hypothetical protein"
1074	Cthe_1152	639	253	302	2070	2173	218	256	"Hypothetical protein"
1075	Cthe_1153	900	115	146	458	490	220	236	"Diguanylate cyclase"
1076	Cthe_1154	255	426	473	506	516	179	210	"XRE family transcriptional regulator"
1077	Cthe_1155	291	71	88	208	243	51	61	"Hypothetical protein"
1078	Cthe_1156	2064	10	15	118	157	36	42	"DNA primase"
1079	Cthe_1158	291	44	51	49	53	48	57	"Hypothetical protein"
1080	Cthe_1159	912	16	23	70	81	17	19	"ParM/StbA family protein "
1081	Cthe_1161	2403	97	120	263	289	66	78	"AAA family ATPase"
1082	Cthe_1162	1824	1769	1578	2734	2630	2798	2875	"Glucosamine-fructose-6-phosphate aminotransferase GlmS"
1083	Cthe_1163	1350	3908	4123	1087	1125	2253	2467	"Phosphoglucosamine mutase"
1084	Cthe_1164	1587	5223	5467	3519	3789	3564	3422	"Hypothetical protein"
1085	Cthe_1165	1212	3056	3346	3308	3245	3384	3544	"Hypothetical protein"
1086	Cthe_1166	879	11503	10378	15156	13367	5007	5346	"TIGR00159 family protein"
1087	Cthe_1167	885	1023	1246	674	774	396	413	"Radical SAM family protein"
1088	Cthe_1168	1389	1201	1366	774	698	502	578	"AmmeMemoRadiSam system protein A"
1089	Cthe_1169	1152	165	189	207	245	185	213	"Beta-lactamase class A-like protein"
1090	Cthe_1170	876	401	450	1019	1345	464	488	"4-hydroxy-tetrahydrodipicolinate reductase"
1091	Cthe_1171	1248	4612	4870	9207	9567	2689	2775	"D-alanyl-D-alanine carboxypeptidase"
1092	Cthe_1172	1149	1618	1788	2681	2887	1283	1432	"DUF362 domain-containing protein"
1093	Cthe_1173	648	232	256	433	478	358	379	"Type IV pilus assembly PilZ"
1094	Cthe_1174	825	196	230	1569	1355	137	168	"RMD1 family protein"
1095	Cthe_1175	810	121	145	926	1089	88	101	"RMD1 family protein"
1096	Cthe_1176	447	1855	1987	7631	7744	1152	1023	"Chemotaxis protein CheX"
1097	Cthe_1177	1461	513	545	298	312	327	302	"Nicotinate phosphoribosyltransferase"
1098	Cthe_1178	726	374	320	296	344	247	278	"Isochorismatase hydrolase"
1099	Cthe_1180	387	111	121	126	135	192	204	"Zinc-ribbon domain-containing protein"
1100	Cthe_1181	2283	502	578	1354	1455	1423	1577	"Transglutaminase domain-containing protein"
1101	Cthe_1182	1269	889	999	1175	1016	2609	2744	"Protein of unknown function DUF58"
1102	Cthe_1183	930	1063	1088	5170	4844	3970	4122	"MoxR family ATPase"
1103	Cthe_1184	669	382	425	1054	1135	1359	1525	"Hypothetical protein"
1104	Cthe_1185	1281	1924	2123	1760	1988	1889	1988	"Hypothetical protein"
1105	Cthe_1186	936	2897	3003	1137	1078	1308	1438	"Alpha/beta hydrolase"
1106	Cthe_1187	855	1735	1978	3406	3523	793	890	"Hypothetical protein"
1107	Cthe_1188	783	196	226	653	723	597	645	"Multidrug ABC transporter permease"
1108	Cthe_1189	969	348	302	1333	1172	596	504	"ATP-binding cassette domain-containing protein"
1109	Cthe_1190	492	36	31	142	178	29	34	"Hypothetical protein"
1110	Cthe_1191	645	184	155	314	377	589	611	"HAD-IA family hydrolase"
1111	Cthe_1192	1032	85675	83456	10302	12377	12291	13452	"Hypothetical protein"
1112	Cthe_1195	345	506	604	70	88	181	146	"Hypothetical protein"
1113	Cthe_1196	1239	54	67	20	28	11	13	"DUF1910 domain-containing protein"
1114	Cthe_1199	1296	6404	6655	6001	5879	7172	6889	"Amidohydrolase MtaD"
1115	Cthe_1200	1245	2843	2542	4223	4655	5115	5324	"Adenosylhomocysteinase AhcY"
1116	Cthe_1201	828	1462	1244	4234	4459	3786	4003	"Purine nucleoside phosphorylase I, inosine and guanosine-specific"
1117	Cthe_1202	1176	1468	1733	2388	2643	672	730	"MFS transporter"
1118	Cthe_1203	1389	1027	1089	1426	1231	2158	2367	"SpoVR family protein"
1119	Cthe_1204	1269	998	876	833	950	1786	1987	"Sporulation protein YhbH"
1120	Cthe_1205	1929	1299	1045	2871	3078	2823	2977	"PrkA family serine protein kinase"
1121	Cthe_1207	1524	2156	2451	7057	7349	5780	6200	"Membrane protein"
1122	Cthe_1208	363	491	434	697	725	1224	1432	"GNAT family N-acetyltransferase"
1123	Cthe_1209	1800	142	189	656	756	1098	1238	"Hypothetical protein"
1124	Cthe_1210	579	12	17	66	88	6	8	"Hypothetical protein"
1125	Cthe_1211	1365	19631	17543	21198	20455	21768	23488	"TrpB-like pyridoxal phosphate-dependent enzyme"
1126	Cthe_1212	939	11178	12453	36149	34577	17965	15346	"Hypothetical protein"
1127	Cthe_1213	273	54	66	213	285	95	137	"Hypothetical protein"
1128	Cthe_1214	381	1	4	18	24	22	27	"Sulfite exporter TauE/SafE family protein"
1129	Cthe_1215	372	14	18	39	45	15	21	"Sulfite exporter TauE/SafE family protein"
1130	Cthe_1216	300	99	132	412	476	172	211	"ATP-dependent Clp protease adapter ClpS"
1131	Cthe_1217	2331	1954	2244	2582	2755	1394	1538	"ATP-dependent Clp protease ATP-binding subunit ClpA"
1132	Cthe_1218	702	52	64	120	145	31	38	"Leucyl/phenylalanyl-tRNA protein transferase"
1133	Cthe_1219	1095	67	77	170	189	55	75	"DUF3810 domain-containing protein"
1134	Cthe_1220	897	489	432	886	910	951	1009	"Hypothetical protein"
1135	Cthe_1221	8769	4226	4766	10530	12354	5917	6213	"Cyclic beta-1,2-glucan synthase"
1136	Cthe_1222	804	572	490	2077	1780	511	632	"23S rRNA (guanosine(2251)-2'-O)-methyltransferase RlmB"
1137	Cthe_1223	354	19062	21345	11441	12346	4362	4455	"50S Ribosomal protein L20"
1138	Cthe_1224	198	341	369	581	605	40	65	"50S ribosomal protein L35"
1139	Cthe_1225	495	4601	4876	9961	12671	1951	2266	"Translation initiation factor IF-3"
1140	Cthe_1226	504	1060	1133	555	589	364	435	"Dihydrofolate reductase"
1141	Cthe_1227	831	1843	1655	1803	1733	1599	1897	"Thymidylate synthase ThyA"
1142	Cthe_1228	1908	24702	25475	21423	20569	21306	24500	"Threonine-tRNA ligase"
1143	Cthe_1229	618	2678	2345	3307	3012	2517	2455	"Spore germination protein-like protein"
1144	Cthe_1230	891	164	183	90	122	43	53	"Competence protein ComEA"
1145	Cthe_1231	1299	366	423	686	755	488	523	"D-alanyl-D-alanine carboxypeptidase"
1146	Cthe_1232	1731	1605	1685	1943	2233	1396	1578	"AMP-dependent synthetase and ligase"
1147	Cthe_1233	540	5	9	47	55	5	13	"Hypothetical protein"
1148	Cthe_1234	771	15	20	55	48	10	18	"Methyl-accepting chemotaxis sensory transducer"
1149	Cthe_1235	20658	23736	22657	16322	17402	27159	25489	"PKD domain containing protein"
1150	Cthe_1237	2478	13719	14236	7437	7233	4282	4005	"Leucine-tRNA ligase"
1151	Cthe_1238	342	4946	5133	1813	1923	796	715	"Ribosome silencing factor"
1152	Cthe_1239	597	982	1183	859	922	451	478	"Hypothetical protein"
1153	Cthe_1240	570	2025	2211	2246	2370	802	887	"HD domain-containing protein"
1154	Cthe_1241	621	1480	1377	682	603	650	610	"Nicotinate (nicotinamide) nucleotide adenylyltransferase NadD"
1155	Cthe_1242	1113	23	32	11	16	12	16	"Integrase catalytic subunit"
1156	Cthe_1243	462	365	420	349	368	108	122	"GNAT family N-acetyltransferase"
1157	Cthe_1244	1173	735	766	996	1268	714	777	"Glycosyltransferase involved in cell wall biosynthesis"
1158	Cthe_1245	1260	5281	5412	1124	1277	2015	2166	"Phosphoribosylamine-glycine ligase"
1159	Cthe_1246	1545	2367	2231	513	482	1658	1566	"Bifunctional phosphoribosylaminoimidazolecarboxamide formyltransferase/IMP cyclohydrolase PurH"
1160	Cthe_1247	630	1263	1390	357	380	661	710	"Phosphoribosylglycinamide formyltransferase PurN"
1161	Cthe_1248	1023	2471	2644	395	456	1519	1672	"Phosphoribosylformylglycinamidine cyclo-ligase PurM"
1162	Cthe_1249	1467	2702	2835	944	1232	2714	2914	"Amidophosphoribosyltransferase PurF"
1163	Cthe_1250	522	683	732	222	255	1336	1520	"Phosphoribosylaminoimidazole carboxylase PurE"
1164	Cthe_1251	1398	7694	7833	4742	4512	8134	8233	"NCS2 family permease"
1165	Cthe_1252	1086	1200	1285	1850	1972	1417	1610	"Auxin efflux carrier"
1166	Cthe_1253	2583	1286	1123	3726	3982	1306	1166	"Phosphoenolpyruvate synthase"
1167	Cthe_1254	369	18	25	141	170	48	60	"Hypothetical protein"
1168	Cthe_1255	456	22	30	50	66	28	33	"Hypothetical protein"
1169	Cthe_1256	2268	1794	1623	3833	3711	5952	5811	"Thermostable beta-glucosidase B, BglB"
1170	Cthe_1257	3153	4670	4820	22150	23669	13558	15102	"Carbohydrate-binding CenC domain protein"
1171	Cthe_1258	780	1712	1834	6728	6923	4202	4334	"Copper amine oxidase N-terminal domain-containing protein"
1172	Cthe_1259	543	2039	2277	2476	2630	1945	2166	"CDP-alcohol phosphatidyltransferase"
1173	Cthe_1260	417	7459	7725	6156	6320	9437	9710	"4-hydroxybenzoyl-CoA thioesterase"
1174	Cthe_1261	975	15041	15680	8294	8012	15608	16230	"6-phosphofructokinase, PfkA"
1175	Cthe_1262	198	4413	4633	4871	4950	7766	7820	"Hypothetical protein"
1176	Cthe_1263	234	3958	4203	6720	6880	11229	12568	"Tryptophan RNA-binding attenuator protein MtrB"
1177	Cthe_1264	3546	4695	4423	4980	4822	5071	4863	"DNA polymerase III, alpha subunit DnaE"
1178	Cthe_1265	1737	12817	14205	5788	5912	14474	15852	"Phosphoglucomutase"
1179	Cthe_1266	2469	201	256	667	725	217	280	"Methyl-accepting chemotaxis protein"
1180	Cthe_1267	651	8	13	17	22	11	18	"Two component LuxR family transcriptional regulator"
1181	Cthe_1268	1179	32	40	91	115	32	43	"DegS sensor signal transduction histidine kinase"
1182	Cthe_1269	1284	2808	2611	1962	2133	1790	1922	"DUF362 domain-containing protein"
1183	Cthe_1270	1224	1267	1122	831	789	1462	1355	"Proteinase IV"
1184	Cthe_1271	2040	6975	7650	3653	3844	909	1248	"Carbohydrate binding family 6/Beta-Xylosidase"
1185	Cthe_1272	738	158	188	516	578	84	109	"RNA polymerase, sigma 28 subunit, FliA/WhiG subfamily, SigI5"
1186	Cthe_1273	1446	2784	2921	3686	3823	681	750	"Alpha-L-arabinofuranosidase B, RsgI5"
1187	Cthe_1274	1308	488	540	639	723	1171	1332	"Sporulation integral membrane protein YlbJ"
1188	Cthe_1275	438	2121	2423	1794	1866	1707	1782	"H+-ATPase subunit H"
1189	Cthe_1276	480	403	455	291	333	142	177	"Pantetheine-phosphate adenylyltransferase"
1190	Cthe_1277	633	1549	1377	2523	2455	1089	1022	"Methyltransferase"
1191	Cthe_1278	2085	864	820	833	765	255	225	"ATP-dependent DNA helicase RecG"
1192	Cthe_1279	189	18335	17500	7640	7535	5626	5412	"50S ribosomal protein L28"
1193	Cthe_1280	267	71	82	634	572	85	92	"Transglycosylase-associated protein"
1194	Cthe_1281	696	3	5	51	57	7	11	"Hypothetical protein"
1195	Cthe_1282	1653	1068	1177	2849	3052	1985	2133	"Diguanylate cyclase with GAF sensor"
1196	Cthe_1283	642	1417	1566	14150	14680	4679	4820	"Endonuclease III"
1197	Cthe_1284	1467	1158	1345	1105	1233	1196	1320	"Glycogen synthase GlgA"
1198	Cthe_1285	1398	3212	3412	4975	5210	2956	3150	"HD domain-containing protein"
1199	Cthe_1286	1530	25160	27120	17614	18456	20630	21440	"PDZ domain-containing protein"
1200	Cthe_1287	1515	1362	1470	1611	1688	964	1450	"HAMP domain-containing protein"
1201	Cthe_1288	687	1482	1270	1298	1149	1172	1290	"Two component transcriptional regulator, winged helix family"
1202	Cthe_1289	195	2228	2388	3049	3258	1411	1244	"Hypothetical protein"
1203	Cthe_1290	342	818	920	2494	2560	2486	2610	"Hypothetical protein"
1204	Cthe_1291	867	1566	1633	1535	1670	1845	2055	"Amidohydrolase 2"
1205	Cthe_1292	1209	3228	3340	6243	6477	843	955	"Cofactor-independent phosphoglycerate mutase"
1206	Cthe_1293	1008	578	521	2114	2311	1021	1140	"HD domain-containing protein"
1207	Cthe_1294	1428	161	180	145	188	177	203	"Recombinase"
1208	Cthe_1295	576	590	523	798	710	575	503	"5-formyltetrahydrofolate cyclo-ligase"
1209	Cthe_1296	687	288	325	716	775	441	506	"Hypothetical protein"
1210	Cthe_1297	1056	746	876	896	1022	251	280	"Nicotinate-nucleotide-dimethylbenzimidazole phosphoribosyltransferase"
1211	Cthe_1298	318	10	13	7	10	6	9	"50S Ribosomal protein L25"
1212	Cthe_1299	315	71	79	99	84	20	24	"Hypothetical protein"
1213	Cthe_1300	1005	14	20	23	28	87	100	"Hypothetical protein"
1214	Cthe_1301	1248	641	680	1820	1945	724	815	"Nucleotidyltransferase"
1215	Cthe_1302	1668	1280	1130	1159	1240	1016	1090	"Ribonuclease J"
1216	Cthe_1303	1227	1289	1132	981	1143	558	520	"Glycosyltransferase family 4 protein"
1217	Cthe_1304	1374	711	800	1181	1346	433	476	"PhoH family protein"
1218	Cthe_1305	348	544	588	427	470	251	299	"Cupin domain-containing protein "
1219	Cthe_1306	402	904	1144	3749	3566	672	630	"Hypothetical protein"
1220	Cthe_1307	1896	4483	4280	9515	9711	1879	2009	"Cellulosome anchoring protein cohesin region SdbA"
1221	Cthe_1308	2652	3306	3466	3796	3941	1836	1930	"Pyruvate phosphate dikinase"
1222	Cthe_1309	1074	3184	3478	5090	5321	2751	2890	"Radical SAM protein"
1223	Cthe_1310	600	539	590	1423	1543	891	1120	"Accessory gene regulator, AgrB"
1224	Cthe_1311	1332	4841	5103	1905	2288	3490	3541	"GHKL domain-containing protein"
1225	Cthe_1312	1389	14982	15377	7159	7022	7179	6912	"Glycine-tRNA ligase"
1226	Cthe_1313	1197	3166	3055	2103	2044	2835	3011	"Bifunctional phosphopantothenoylcysteine decarboxylase/phosphopantothenate-cysteine ligase CoaBC"
1227	Cthe_1314	237	755	840	308	344	332	376	"DNA-directed RNA polymerase, omega subunit"
1228	Cthe_1315	612	2587	2699	1069	1230	924	1077	"Guanylate kinase"
1229	Cthe_1316	282	4302	4240	1602	1522	1864	1756	"Protein of unknown function DUF370"
1230	Cthe_1317	885	11810	10522	4038	4233	6198	5962	"YicC family protein"
1231	Cthe_1318	372	4083	3920	1692	1540	609	566	"Response regulator receiver protein"
1232	Cthe_1319	744	9613	9820	2630	2740	1764	1870	"16S rRNA (uracil1498-N3)-methyltransferase"
1233	Cthe_1320	942	8194	8473	4417	4578	3210	3344	"50S ribosomal protein L11 methyltransferase"
1234	Cthe_1321	1161	12118	12800	4445	4790	10732	11355	"Chaperone protein DnaJ"
1235	Cthe_1322	1827	79410	80422	46038	47223	30325	31568	"Chaperone protein DnaK"
1236	Cthe_1323	681	19916	21455	16231	16900	4210	4368	"Nucleotide exchange factor GrpE"
1237	Cthe_1324	1056	30142	32774	45540	46588	5474	5278	"Heat-inducible transcription repressor HrcA"
1238	Cthe_1325	1143	1515	1465	1239	1462	1096	1230	"Coproporphyrinogen III oxidase, anaerobic"
1239	Cthe_1326	1812	5674	5788	4056	4279	2143	2268	"Elongation factor 4"
1240	Cthe_1327	282	14	17	26	30	18	22	"Hypothetical protein"
1241	Cthe_1328	1278	47	55	110	145	129	137	"Stage II sporulation protein P"
1242	Cthe_1329	4302	15735	16349	24485	26477	32126	32865	"2-hydroxyacyl-CoA dehydratase"
1243	Cthe_1330	525	5210	5078	3361	3456	5034	5135	"Signal peptidase I"
1244	Cthe_1331	1788	17426	18966	11729	14233	8962	9462	"Aspartate-tRNA ligase"
1245	Cthe_1332	1254	14411	15677	7113	7012	9163	9357	"Histidine-tRNA ligase"
1246	Cthe_1333	1131	292	254	563	536	483	455	"Hypothetical protein"
1247	Cthe_1334	1563	396	440	595	668	419	450	"FHA domain-containing protein"
1248	Cthe_1335	630	73	82	162	183	145	161	"Peptidase A24A prepilin type IV"
1249	Cthe_1336	702	525	580	583	632	149	172	"Flp pilus assembly protein TadG"
1250	Cthe_1337	870	84	93	70	79	69	76	"Type II secretion system F family protein"
1251	Cthe_1338	807	741	780	712	756	314	335	"Pilus assembly protein TadB"
1252	Cthe_1339	1239	571	623	737	788	2493	2566	"CpaF family protein"
1253	Cthe_1340	1128	518	605	719	786	399	445	"Hypothetical protein"
1254	Cthe_1341	1518	3426	3578	3885	3655	2625	2465	"Coproporphyrinogen dehydrogenase HemZ"
1255	Cthe_1342	606	1311	1523	877	813	1675	1744	"MBL fold metallo-hydrolase"
1256	Cthe_1343	450	1011	1169	636	678	1486	1566	"D-tyrosyl-tRNA(Tyr) deacylase"
1257	Cthe_1344	2175	13865	14863	13433	14655	14266	15320	"(p)ppGpp synthetase I, SpoT/RelA"
1258	Cthe_1345	516	4216	4385	5329	5532	5442	5644	"Adenine phosphoribosyltransferase"
1259	Cthe_1346	2484	13794	13245	23069	22640	16836	17445	"Single-stranded-DNA-specific exonuclease RecJ"
1260	Cthe_1347	444	78992	78023	75848	75120	45583	44783	"GatB/YqeY domain-containing protein"
1261	Cthe_1348	177	15646	16355	17620	18452	11535	10665	"30S ribosomal protein S21"
1262	Cthe_1349	1404	764	835	2424	2546	1731	1788	"Exopolysaccharide biosynthesis polyprenyl glycosylphosphotransferase"
1263	Cthe_1350	405	3778	3925	2888	3008	2864	2982	"Single-stranded DNA-binding protein"
1264	Cthe_1351	480	642	665	1794	1923	1568	1633	"VanZ family protein"
1265	Cthe_1352	1332	4711	4892	5151	5230	3806	3882	"UDP-glucose 6-dehydrogenase"
1266	Cthe_1353	1461	1473	1574	3252	3421	1361	1432	"Flippase"
1267	Cthe_1354	1272	1047	978	1846	1720	610	573	"Hypothetical protein"
1268	Cthe_1355	933	1104	1168	3336	3425	805	835	"Glycosyltransferase family 2 protein"
1269	Cthe_1356	906	3406	3546	2799	2940	1357	1450	"Glycosyltransferase"
1270	Cthe_1357	1146	2198	2265	3035	3076	1407	1475	"Glycosyl transferase group 1"
1271	Cthe_1358	891	1105	1238	1550	1506	1189	1321	"Glycosyltransferase"
1272	Cthe_1359	495	547	590	714	775	411	445	"Glycosyltransferase 28 domain-containing protein"
1273	Cthe_1360	492	3828	3645	7851	7632	2181	2065	"Beta-1,4-galactosyltransferase enhancer"
1274	Cthe_1361	1044	1034	1089	1669	1523	1024	950	"NAD-dependent epimerase/dehydratase"
1275	Cthe_1362	558	4153	4358	8682	8876	3944	4231	"Antiterminator LoaP"
1276	Cthe_1363	1395	6056	6158	10935	10275	4167	4285	"Polysaccharide biosynthesis tyrosine autokinase"
1277	Cthe_1364	1179	1559	1745	2437	2655	1815	1900	"SGNH/GDSL hydrolase family protein"
1278	Cthe_1365	567	2530	2600	8733	8850	3645	3812	"Hypothetical protein"
1279	Cthe_1366	552	3467	3547	7741	7866	2000	2223	"dTDP-4-dehydrorhamnose 3,5-epimerase"
1280	Cthe_1367	777	848	950	5782	5841	787	840	"Protein-tyrosine-phosphatase"
1281	Cthe_1368	2133	28188	29232	20039	21450	17242	18560	"S-layer homology domain-containing protein"
1282	Cthe_1369	345	3408	3489	3757	3612	1458	1352	"Histidine triad nucleotide-binding protein"
1283	Cthe_1370	462	816	874	213	268	750	823	"Hypothetical protein"
1284	Cthe_1371	5880	18445	18105	15001	14345	10246	9844	"RHS repeat protein"
1285	Cthe_1372	459	968	1004	1245	1322	692	741	"Hypothetical protein"
1286	Cthe_1373	5754	10566	10112	3551	3474	5414	5340	"YD repeat-containing protein"
1287	Cthe_1374	789	652	690	326	315	1134	1075	"Copper amine oxidase-like domain-containing protein"
1288	Cthe_1375	1350	4283	4413	2953	3145	2090	2230	"Aspartate kinase"
1289	Cthe_1376	1248	4210	4355	2117	2266	1703	1784	"Homoserine dehydrogenase"
1290	Cthe_1377	444	984	1122	768	835	863	922	"Amino acid-binding ACT domain protein"
1291	Cthe_1378	1521	46	63	432	495	95	120	"Response regulator receiver modulated metal dependent phosphohydrolase"
1292	Cthe_1379	1089	50	75	258	306	252	324	"Gfo/Idh/MocA family oxidoreductase"
1293	Cthe_1380	375	106	93	202	184	459	432	"Response regulator"
1294	Cthe_1381	1500	7228	7423	9951	11203	12554	13233	"Threonine synthase"
1295	Cthe_1382	1125	2961	3266	4227	4456	6010	6288	"Patatin"
1296	Cthe_1383	1158	2113	2227	6230	6348	6149	6255	"Tetratricopeptide repeat protein"
1297	Cthe_1384	1287	1654	1750	2163	2233	5130	5244	"Bifunctional folylpolyglutamate synthase/dihydrofolate synthase"
1298	Cthe_1385	2733	6294	6370	10871	11400	26000	26750	"Preprotein translocase subunit SecA"
1299	Cthe_1386	600	1018	1074	2261	2340	5598	5723	"DUF5317 domain-containing protein"
1300	Cthe_1387	396	134	160	512	573	49	56	"Hypothetical protein"
1301	Cthe_1388	294	2873	2932	11258	12400	4317	4589	"TrpR like protein, YerC/YecD"
1302	Cthe_1389	1329	642	750	3288	3355	3295	3422	"CCA tRNA nucleotidyltransferase"
1303	Cthe_1390	933	425	460	14335	14888	4022	4115	"Alpha/beta fold family hydrolase"
1304	Cthe_1391	1536	15035	15800	37515	38611	18433	19200	"2-isopropylmalate synthase leuA"
1305	Cthe_1393	1770	619	672	949	1010	923	966	"HAMP domain-containing protein"
1306	Cthe_1394	711	1040	1135	786	860	871	945	"Response regulator transcription factor"
1307	Cthe_1396	1545	583	622	1076	1234	548	678	"Cardiolipin synthase"
1308	Cthe_1397	819	1307	1378	1850	1975	1530	1582	"Glycosyl transferase family 8"
1309	Cthe_1398	2529	48581	47680	18120	18654	8750	8866	"Xyloglucanase Xgh74A"
1310	Cthe_1399	519	1469	1544	1359	1470	1366	1433	"C_GCAxxG_C_C family protein"
1311	Cthe_1400	1248	504	580	1170	1236	198	245	"Arabinogalactan endo-beta-1,4-galactanase"
1312	Cthe_1401	333	947	1120	7533	7650	1428	1620	"Hypothetical protein"
1313	Cthe_1402	480	4	6	30	34	15	20	"Transcriptional regulator MntR"
1314	Cthe_1403	240	5	9	28	34	2	4	"Fe2+ transport system protein A"
1315	Cthe_1404	2151	57	70	713	772	113	140	"Fe2+ transport system protein B"
1316	Cthe_1405	2130	562	632	601	680	1896	2006	"Spore coat protein CotH"
1317	Cthe_1406	687	45	52	127	156	155	180	"DUF4956 domain-containing protein"
1318	Cthe_1407	687	29	33	225	255	71	79	"Polyphosphate polymerase domain-containing protein"
1319	Cthe_1408	699	208	228	1394	1435	412	478	"Two component transcriptional regulator, winged helix family"
1320	Cthe_1409	1470	495	522	1910	2166	1525	1744	"HAMP domain-containing histidine kinase"
1321	Cthe_1410	1002	1761	1899	3162	3322	3199	3244	"Cation diffusion facilitator family transporter"
1322	Cthe_1411	771	9074	9180	8699	9233	9731	9945	"Tryptophan synthase, alpha chain TrpA"
1323	Cthe_1412	1185	15534	15023	14378	14877	20618	21344	"Tryptophan synthase subunit beta"
1324	Cthe_1413	1917	106	89	413	400	104	94	"Hypothetical protein"
1325	Cthe_1414	1254	83	91	160	179	75	89	"Hypothetical protein"
1326	Cthe_1415	861	117	145	275	315	164	195	"ABC transporter related protein/ABC-type multidrug transport system, ATPase component"
1327	Cthe_1419	423	281	310	1400	1452	137	165	"Hypothetical protein"
1328	Cthe_1420	597	767	895	1476	1543	406	466	"Manganese efflux pump MntP"
1329	Cthe_1421	981	1114	1250	1760	1888	938	1144	"Signal peptide peptidase SppA"
1330	Cthe_1422	774	701	655	1638	1697	1330	1445	"L-rhamnose mutarotase"
1331	Cthe_1423	1107	1199	1260	1208	1277	1005	1230	"Protein of unknown function UPF0118"
1332	Cthe_1424	942	986	1140	7655	7855	4757	4622	"Tryptophan-rich sensory protein (TspO)"
1333	Cthe_1425	2085	309	362	2757	2912	3087	3132	"Sodium-translocating pyrophosphatase"
1334	Cthe_1426	735	340	376	1294	1350	491	540	"AzlC family ABC transporter permease"
1335	Cthe_1427	303	26	40	98	134	90	122	"AzlD domain-containing protein"
1336	Cthe_1428	1329	33	41	102	135	112	155	"Glycoside hydrolase family 1 protein"
1337	Cthe_1429	900	18	22	76	89	75	86	"Serine/threonine protein phosphatase"
1338	Cthe_1430	1014	14	19	70	77	108	144	"DUF4474 domain-containing protein"
1339	Cthe_1431	1956	1264	1377	7640	7800	5363	5564	"Hypothetical protein"
1340	Cthe_1432	477	1335	1426	3039	3167	2741	2933	"IS200/IS605 family transposase"
1341	Cthe_1433	774	3913	4056	10711	11330	4321	4528	"Short-chain dehydrogenase/reductase SDR"
1342	Cthe_1434	591	129	140	487	503	157	170	"Hypothetical protein"
1343	Cthe_1435	582	934	975	1372	1433	522	586	"Histidine phosphatase family protein"
1344	Cthe_1437	903	1601	1682	19522	19952	8064	8144	"Anti-sigma V factor rsiV"
1345	Cthe_1438	504	306	355	4255	4331	2822	2980	"RNA polymerase, sigma-24 subunit, ECF subfamily"
1346	Cthe_1443	924	35	39	264	300	257	321	"DUF2935 domain-containing protein"
1347	Cthe_1444	426	109	145	402	480	509	577	"GNAT family N-acetyltransferase"
1348	Cthe_1445	246	236	267	1332	1412	1478	1544	"AraC family transcriptional regulator"
1349	Cthe_1446	2538	1580	1644	2724	2895	2729	2944	"Peptidase S1 and S6, chymotrypsin/Hap"
1350	Cthe_1447	537	79	94	208	265	583	620	"Hypothetical protein"
1351	Cthe_1448	1413	764	792	1149	1235	335	352	"MATE efflux family protein"
1352	Cthe_1449	459	836	874	493	533	310	340	"MarR family transcriptional regulator"
1353	Cthe_1450	786	19	23	202	225	45	53	"Hypothetical protein"
1354	Cthe_1451	474	50	57	189	205	54	60	"GCN5-related N-acetyltransferase"
1355	Cthe_1452	1656	676	623	986	1023	2808	2865	"Membrane protein"
1356	Cthe_1454	426	84	98	356	423	216	275	"Zinc-ribbon domain-containing protein"
1357	Cthe_1455	675	176	190	559	588	374	400	"DNA alkylation repair enzyme"
1358	Cthe_1456	786	2365	2415	3138	3255	4248	4433	"Amino acid ABC transporter ATP-binding protein"
1359	Cthe_1457	663	1470	1545	2274	2338	3181	3321	"Amino acid ABC transporter permease"
1360	Cthe_1458	810	4926	4857	4172	4488	6763	6823	"Amino acid ABC transporter substrate-binding protein"
1361	Cthe_1461	1566	14	18	68	74	92	108	"FAD dependent oxidoreductase"
1362	Cthe_1462	315	494	465	2708	2650	765	712	"Helix-turn-helix domain protein"
1363	Cthe_1463	348	818	870	1467	1512	360	380	"Type II toxin-antitoxin system RelE/ParE family toxin"
1364	Cthe_1464	282	26	23	13	10	19	15	"Endoribonuclease L-PSP"
1365	Cthe_1465	453	329	302	91	85	113	100	"Redoxin"
1366	Cthe_1466	546	146	135	203	265	121	104	"ClbS/DfsB family four-helix bundle protein"
1367	Cthe_1467	228	1	3	15	19	4	6	"Helix-turn-helix type 11 domain protein"
1368	Cthe_1470	618	2762	2668	19521	20366	5286	5133	"RNA polymerase, sigma-24 subunit, ECF subfamily, Sig24C"
1369	Cthe_1471	1686	1205	1285	8172	8236	459	488	"Anti sigma factor Rsi24C"
1370	Cthe_1472	2703	1100	1166	6550	6822	8753	8911	"Bifunctional endo-beta-1,4-glucanase/beta-1,4-xylanase H CelH"
1371	Cthe_1473	564	1507	1622	3824	3910	1646	1723	"NAD(P)H-dependent oxidoreductase"
1372	Cthe_1475	918	1486	1544	4238	4321	2947	3277	"Hypothetical protein"
1373	Cthe_1477	537	4027	3877	6197	5876	4711	4568	"dCTP deaminase"
1374	Cthe_1478	561	353	378	463	487	232	255	"TetR family transcriptional regulator"
1375	Cthe_1479	609	8	11	108	123	16	23	"Hypothetical protein"
1376	Cthe_1480	2106	35	41	312	344	46	51	"MMPL family transporter"
1377	Cthe_1481	2313	90	98	225	260	209	243	"Membrane protein"
1378	Cthe_1482	816	661	622	532	502	952	930	"Cof-type HAD-IIB family hydrolase"
1379	Cthe_1483	1059	486	510	462	502	830	850	"Hypothetical protein"
1380	Cthe_1484	711	404	465	567	622	1451	1533	"AraC family transcriptional regulator"
1381	Cthe_1485	1254	3718	3790	4256	4322	4650	4733	"Beta-lactamase domain protein"
1382	Cthe_1486	396	131	176	131	168	331	370	"8-oxo-dGTP diphosphatase MutT"
1383	Cthe_1487	399	239	262	180	212	327	351	"Hypothetical protein"
1384	Cthe_1488	2277	235	265	543	573	133	150	"Methyl-accepting chemotaxis sensory transducer"
1385	Cthe_1491	318	60	76	309	346	123	148	"Transcriptional regulator PadR family protein"
1386	Cthe_1492	1623	2195	2234	548	588	833	872	"NAD(P)H dehydrogenase (Quinone)"
1387	Cthe_1493	615	1377	1435	272	320	326	355	"Transcriptional regulator, PadR-like family"
1388	Cthe_1494	414	147	178	61	88	422	470	"EamA family transporter"
1389	Cthe_1495	393	796	840	1122	1189	1585	1640	"Pyridoxamine 5'-phosphate oxidase-related FMN-binding protein"
1390	Cthe_1497	639	29	35	1620	1650	353	380	"Hypothetical protein"
1391	Cthe_1498	1809	67	84	130	155	67	80	"Methyl-accepting chemotaxis sensory transducer"
1392	Cthe_1499	1755	131	172	1425	1482	441	488	"Ammonium transporter, Amt family"
1393	Cthe_1500	1893	546	578	491	532	178	200	"ABC transporter transmembrane region"
1394	Cthe_1501	1737	195	223	362	410	64	81	"ABC transporter ATP-binding protein"
1395	Cthe_1502	474	211	245	351	372	97	115	"Transcriptional regulator, MarR family"
1396	Cthe_1503	360	2447	2374	11938	11398	10598	10156	"Hypothetical protein"
1397	Cthe_1504	813	7483	7668	30015	30781	30591	31245	"Linocin_M18 bacteriocin protein"
1398	Cthe_1505	672	52	65	195	235	94	144	"S-layer homology domain-containing protein"
1399	Cthe_1506	1023	1917	1989	2792	2945	913	983	"Metal dependent phosphohydrolase"
1400	Cthe_1507	459	152	177	136	152	251	283	"Gamma-glutamylcyclotransferase"
1401	Cthe_1508	357	212	256	317	369	99	126	"Arsenate reductase family protein"
1402	Cthe_1509	1236	1656	1533	1768	1655	1327	1477	"Protein of unknown function DUF438"
1403	Cthe_1510	744	628	665	792	841	1002	1336	"SDR family oxidoreductase"
1404	Cthe_1511	990	890	968	564	612	982	1135	"DNA methylase N-4/N-6 domain protein"
1405	Cthe_1512	933	777	805	446	489	1137	1235	"Type II restriction endonuclease"
1406	Cthe_1513	942	846	890	962	1014	2358	2470	"DNA adenine methylase"
1407	Cthe_1514	879	2171	2350	4819	4910	1661	1766	"Membrane protein"
1408	Cthe_1516	1032	142	177	88	132	132	168	"Ribosome small subunit-dependent GTPase A"
1409	Cthe_1517	1110	839	895	1921	2077	1483	1566	"Type I phosphodiesterase"
1410	Cthe_1519	1230	963	1035	3151	3223	932	981	"Class I SAM-dependent rRNA methyltransferase"
1411	Cthe_1520	543	948	1012	604	635	236	250	"Hypothetical protein"
1412	Cthe_1521	516	1791	1835	1403	1476	402	445	"Hypothetical protein"
1413	Cthe_1522	639	126	155	76	91	72	85	" NADPH-dependent FMN reductase"
1414	Cthe_1523	1881	142	177	516	546	284	305	"Glycosyl transferase group 1"
1415	Cthe_1524	1041	117	144	413	466	137	160	"Copper amine oxidase-like domain-containing protein"
1416	Cthe_1525	1869	142	177	1661	1722	180	213	"ABC transporter permease"
1417	Cthe_1526	765	121	156	835	780	74	87	"ABC-type antimicrobial peptide transport system, ATPase component"
1418	Cthe_1527	1032	1254	1328	1570	1623	383	423	"Periplasmic sensor signal transduction histidine kinase"
1419	Cthe_1528	675	436	488	1698	1745	286	315	"Response regulator transcription factor"
1420	Cthe_1529	1253	1596	1664	2703	2795	1258	1310	"Transposase"
1421	Cthe_1533	1224	12	17	15	28	5	8	"Transposase mutator type"
1422	Cthe_1534	1638	158	203	1137	1196	330	366	"Hypothetical protein"
1423	Cthe_1535	765	166	178	206	225	318	358	"ABC-2 type transport system permease protein"
1424	Cthe_1536	918	625	650	728	766	1088	1133	"ABC-type multidrug transport system, ATPase component"
1425	Cthe_1538	1125	791	745	965	930	1313	1256	"XRE family transcriptional regulator"
1426	Cthe_1539	2106	64	78	92	145	60	82	"L-glutamine synthetase"
1427	Cthe_1540	1416	122	145	169	186	192	223	"Aspartyl/glutamyl-tRNA(Asn/Gln) amidotransferase subunit B"
1428	Cthe_1541	1461	224	240	1189	1223	544	572	"Glutamyl-tRNA(Gln) amidotransferase subunit A"
1429	Cthe_1542	294	73	89	408	445	175	200	"Glutamyl-tRNA(Gln) amidotransferase, C subunit"
1430	Cthe_1543	1746	716	745	2555	2632	717	750	"Aspartate-tRNA(Asp/Asn) ligase"
1431	Cthe_1546	1134	847	876	1547	1622	1600	1658	"4Fe-4S ferredoxin, iron-sulfur binding"
1432	Cthe_1547	435	45	65	271	289	230	270	"DUF2871 domain-containing protein"
1433	Cthe_1548	747	142	160	790	723	403	450	"Enoyl-CoA hydratase/isomerase"
1434	Cthe_1549	672	352	373	980	1080	564	590	"Class I SAM-dependent methyltransferase"
1435	Cthe_1552	393	550	580	807	846	832	876	"Hypothetical protein"
1436	Cthe_1553	573	2103	2176	1646	1723	2234	2310	"Flavin reductase"
1437	Cthe_1554	528	1591	1688	715	789	5990	6335	"Methylated-DNA--[protein]-cysteine S-methyltransferase"
1438	Cthe_1555	885	5742	5877	1954	2130	13594	14230	"Metal ABC transporter substrate-binding protein"
1439	Cthe_1556	711	7953	8355	3361	3215	9397	9123	"Binding-protein-dependent transport systems inner membrane component"
1440	Cthe_1557	822	20373	20895	10059	10886	25695	24328	"ABC-type metal ion transport system, ATPase component "
1441	Cthe_1558	456	1720	1823	2473	2566	1476	1589	"Transcriptional regulator, BadM/Rrf2 family"
1442	Cthe_1559	1164	4731	4923	12836	13450	15153	15772	"PLP-dependent transferase"
1443	Cthe_1560	909	1940	2344	3520	3680	7517	7720	"Cysteine synthase"
1444	Cthe_1561	438	435	475	1023	1068	237	260	"DUF4418 family protein"
1445	Cthe_1562	1212	3974	4155	7167	7366	15443	15900	"FtsX-like permease family protein"
1446	Cthe_1563	672	1824	1960	803	876	3402	3557	"ABC transporter ATP-binding protein"
1447	Cthe_1564	540	3723	3920	5654	5799	8184	8366	"GNAT family N-acetyltransferase"
1448	Cthe_1565	1476	3735	3866	4277	4488	10579	11345	"Oxidoreductase/nitrogenase component 1"
1449	Cthe_1566	1344	4115	4266	1685	1745	12110	13255	"Hydrogenase"
1450	Cthe_1567	336	1273	1365	836	876	3890	3966	"Diguanylate cyclase"
1451	Cthe_1568	876	1266	1344	1179	1286	6289	6411	"Radical SAM domain protein"
1452	Cthe_1569	1317	1684	1766	1489	1555	12758	13356	"O-acetylhomoserine aminocarboxypropyltransferase/cysteine synthase"
1453	Cthe_1570	1062	2037	2344	1261	1460	11716	12566	"ABC transporter substrate-binding protein"
1454	Cthe_1571	1068	744	710	1209	1275	6474	6621	"Binding-protein-dependent transport systems inner membrane component"
1455	Cthe_1572	804	347	376	475	523	3578	3682	"ABC transporter ATP-binding protein"
1456	Cthe_1573	855	400	440	358	367	3335	3120	"Nitrogenase iron protein nifH"
1457	Cthe_1574	744	1250	1430	1768	1688	908	866	"Hypothetical protein"
1458	Cthe_1575	711	54	66	133	170	58	65	"Purine nucleoside phosphorylase DeoD-type"
1459	Cthe_1576	1068	219	241	179	205	157	178	"Basic membrane lipoprotein"
1460	Cthe_1577	1530	161	188	152	172	168	190	"Yjjl family glycine radical enzyme"
1461	Cthe_1578	843	29	21	79	75	53	58	"Pyruvate formate lyase activating enzyme"
1462	Cthe_1579	1563	29	35	100	130	113	150	"Simple sugar transport system ATP-binding protein"
1463	Cthe_1580	1119	13	19	51	63	49	58	"Simple sugar transport system permease protein"
1464	Cthe_1581	936	16	21	48	63	54	70	"Inner-membrane translocator"
1465	Cthe_1583	669	16	20	33	38	102	135	"Deoxyribose-phosphate aldolase deoC"
1466	Cthe_1584	780	74	96	201	245	215	280	"Two component transcriptional regulator, AraC family"
1467	Cthe_1585	1725	29	35	190	234	328	368	"Signal transduction histidine kinase, LytS"
1468	Cthe_1586	1656	49	60	697	755	2693	2823	"Iron(III) transport system permease protein"
1469	Cthe_1587	1104	164	199	2030	2230	6558	6782	"Iron(III) transport system ATP-binding protein"
1470	Cthe_1588	1107	293	332	3312	3144	11855	10889	"ABC-type Fe3+ transport system, periplasmic component"
1471	Cthe_1589	363	21	28	148	166	138	158	"BlaI/MecI/CopY family transcriptional regulator"
1472	Cthe_1590	2265	438	480	2156	2240	2206	2295	"Peptidase M56 BlaR1"
1473	Cthe_1591	414	222	256	1443	1510	244	288	"Hypothetical protein"
1474	Cthe_1592	1176	2655	2544	7744	7512	2823	2713	"Glycerate kinase"
1475	Cthe_1593	570	541	623	1532	1733	493	564	"NUDIX hydrolase"
1476	Cthe_1594	318	90	110	165	189	108	146	"Hypothetical protein"
1477	Cthe_1595	618	85	102	70	90	108	156	"2'-5' RNA ligase family protein"
1478	Cthe_1596	474	634	689	1470	1620	400	450	"MarR family transcriptional regulator"
1479	Cthe_1597	444	254	312	765	895	145	178	"Flavodoxin"
1480	Cthe_1598	675	402	470	442	523	258	292	"Nitroreductase"
1481	Cthe_1599	1671	1317	1450	1809	1933	2016	2277	"Multi-sensor signal transduction histidine kinase"
1482	Cthe_1600	675	1226	1135	1523	1357	2396	2543	"Two component transcriptional regulator, winged helix family"
1483	Cthe_1601	651	2423	2755	2186	2467	2099	2355	"Phosphate uptake regulator, PhoU"
1484	Cthe_1602	750	449	490	558	590	484	523	"Phosphate import ATP-binding protein PstB"
1485	Cthe_1603	876	51	68	22	34	20	28	"Phosphate ABC transporter, inner membrane subunit PstA"
1486	Cthe_1604	855	1157	1366	138	165	566	623	"Phosphate ABC transporter, inner membrane subunit PstC"
1487	Cthe_1605	855	554	588	153	188	166	210	"ABC-type phosphate transport system periplasmic component-like protein"
1488	Cthe_1608	456	13	22	12	18	10	16	"Recombinase"
1489	Cthe_1609	1569	23	30	42	55	19	27	"Site-specific recombinases, DNA invertase Pin homologs"
1490	Cthe_1611	1005	2	5	9	15	13	20	"Peptidoglycan-binding LysM"
1491	Cthe_1613	2424	23	28	51	64	27	32	"Glycoside hydrolase family 18"
1492	Cthe_1616	2523	25	34	35	53	27	38	"Hypothetical protein"
1493	Cthe_1618	2289	14	18	48	43	35	30	"Hypothetical protein"
1494	Cthe_1619	273	321	389	10187	9823	1390	1256	"Transcriptional regulator, AbrB family"
1495	Cthe_1620	405	2000	2167	34061	32467	4382	4571	"Putative toxin-antitoxin system toxin component"
1496	Cthe_1622	384	16	23	13	20	6	9	"Hypothetical protein"
1497	Cthe_1623	597	16	20	17	21	11	14	"Phage major tail protein, phi13 family"
1498	Cthe_1625	432	11	14	9	12	16	18	"Phage protein, HK97 gp10 family"
1499	Cthe_1628	1203	6	10	8	14	12	18	"Phage major capsid protein, HK97 family"
1500	Cthe_1629	729	11	15	29	32	28	33	"Clp protease ClpP"
1501	Cthe_1630	1323	11	15	81	72	29	35	"Phage portal protein, HK97 family"
1502	Cthe_1631	1785	2499	2644	4046	4230	804	890	"AIPR family protein"
1503	Cthe_1632	1568	6	10	54	66	25	36	"Phage terminase-like protein, large subunit"
1504	Cthe_1634	468	4	7	21	32	20	34	"Gamma-glutamylcyclotransferase"
1505	Cthe_1635	900	7	11	51	62	61	78	"Amidoligase enzyme"
1506	Cthe_1637	693	6	10	85	98	53	77	"Virulence factor"
1507	Cthe_1638	1254	15	22	267	307	98	130	"DNA modification methylase"
1508	Cthe_1639	1299	25	37	452	535	193	235	"DNA methylase N-4/N-6 domain protein"
1509	Cthe_1640	552	9	15	102	145	48	56	"Terminase"
1510	Cthe_1641	360	6	10	47	55	32	43	"HNH endonuclease"
1511	Cthe_1642	243	3	5	76	84	18	23	"Hypothetical protein"
1512	Cthe_1643	999	8704	9266	59239	61266	27384	29844	"DUF4065 domain-containing protein"
1513	Cthe_1644	435	1030	976	7359	7123	2370	2177	"Hypothetical protein"
1514	Cthe_1645	456	23	28	19	24	17	21	"Hypothetical protein"
1515	Cthe_1646	303	7	10	12	17	9	20	"VRR-NUC domain-containing protein"
1516	Cthe_1647	2556	21	30	75	95	67	84	"DNA primase"
1517	Cthe_1650	1923	8	11	53	60	23	28	"DNA-directed DNA polymerase"
1518	Cthe_1653	1359	3	7	24	35	10	15	"SNF2-related protein"
1519	Cthe_1654	1920	141	166	1547	1644	172	230	"Hypothetical protein"
1520	Cthe_1655	207	11	20	118	134	145	177	"Transcriptional regulator, XRE family"
1521	Cthe_1658	1353	352	389	1427	1532	454	488	"Potassium transporter, TrkH family"
1522	Cthe_1659	654	169	190	305	345	195	234	"Trk system potassium uptake protein"
1523	Cthe_1661	837	2	5	26	34	1	4	"Integrase catalytic subunit"
1524	Cthe_1663	429	320	380	155	188	127	147	"RidA family protein"
1525	Cthe_1664	678	354	334	701	683	260	225	"Transcriptional regulator, MerR family"
1526	Cthe_1665	843	225	248	439	489	74	86	"Hsp33 family molecular chaperone HslO"
1527	Cthe_1667	717	5	8	22	26	8	14	"ABC-2 type transport system permease protein"
1528	Cthe_1668	705	4	7	13	16	8	11	"ABC-type multidrug transport system, ATPase component"
1529	Cthe_1670	432	9	14	28	36	7	13	"Recombinase"
1530	Cthe_1671	1569	9	13	11	15	13	17	"Resolvase domain-containing protein/Site-specific DNA recombinase"
1531	Cthe_1677	687	5	8	39	46	12	16	"Abortive infection protein"
1532	Cthe_1678	636	34	44	139	150	136	168	"Vat family streptogramin A O-acetyltransferase"
1533	Cthe_1679	732	39	48	190	223	154	188	"Methyltransferase type 11"
1534	Cthe_1680	846	110	132	484	522	338	389	"Nucleotidyltransferase domain-containing protein"
1535	Cthe_1684	606	604	586	1172	1110	533	502	"Transposase IS3/IS911 family protein"
1536	Cthe_1685	1725	107	134	392	445	176	210	"ABC-type multidrug transport system, ATPase and permease components"
1537	Cthe_1688	981	448	492	1100	1245	683	766	"Radical SAM protein"
1538	Cthe_1689	846	207	230	881	980	502	550	"Pyrroloquinoline quinone biosynthesis protein PqqD"
1539	Cthe_1690	993	706	788	1048	1142	820	974	"Radical SAM domain protein"
1540	Cthe_1693	552	397	541	231	355	146	175	"Hypothetical protein"
1541	Cthe_1694	621	49	54	66	80	60	72	"DUF1533 domain-containing protein"
1542	Cthe_1695	1476	240	210	432	488	469	512	"Radical SAM domain protein"
1543	Cthe_1696	600	9815	10233	8524	9245	1455	1742	"Hypothetical protein"
1544	Cthe_1697	261	1501	1769	2379	2577	891	945	"ArsR family transcriptional regulator"
1545	Cthe_1698	312	4341	4688	6266	6742	1800	1932	"Hypothetical protein"
1546	Cthe_1700	1329	102	128	52	60	47	55	"Resolvase domain-containing protein"
1547	Cthe_1701	1290	13	17	18	25	29	35	"Resolvase domain-containing protein"
1548	Cthe_1702	672	1	3	12	17	6	10	"Cell wall hydrolase/autolysin"
1549	Cthe_1703	495	5	8	5	9	5	7	"HNH endonuclease"
1550	Cthe_1704	411	33	37	30	38	38	42	"Phage holin family protein"
1551	Cthe_1705	1689	40	45	58	64	55	63	"Hypothetical protein"
1552	Cthe_1706	1158	12	18	33	42	21	25	"Hypothetical protein"
1553	Cthe_1707	1905	32	40	70	84	25	32	"Phage tail protein"
1554	Cthe_1708	705	4	6	17	25	7	13	"Phage tail component"
1555	Cthe_1709	2280	16	20	40	44	33	37	"Phage tail tape measure protein"
1556	Cthe_1710	324	23	30	65	70	37	40	"Protein of unknown function DUF710"
1557	Cthe_1711	453	207	230	536	564	110	135	"Hypothetical protein"
1558	Cthe_1713	573	27	33	8	10	25	29	"Phage major tail protein, phi13 family"
1559	Cthe_1717	573	14	20	35	42	16	22	"Hypothetical protein"
1560	Cthe_1718	441	13	17	31	34	14	17	"Hypothetical protein"
1561	Cthe_1719	1290	26	30	35	42	22	28	"Phage major capsid protein, HK97 family"
1562	Cthe_1720	744	21	26	20	24	18	22	"Clp protease ClpP"
1563	Cthe_1721	1260	25	29	46	56	24	27	"HK97 family phage portal protein"
1564	Cthe_1722	2550	94	122	57	72	38	44	"Phage terminase-like protein, large subunit"
1565	Cthe_1723	483	21	24	8	11	33	36	"P27 family phage terminase small subunit"
1566	Cthe_1724	753	58	63	57	62	33	29	"Hypothetical protein"
1567	Cthe_1725	312	19	29	18	26	9	12	"Hypothetical protein"
1568	Cthe_1726	480	43	53	9	6	21	18	"Gamma-glutamylcyclotransferase"
1569	Cthe_1727	924	50	56	43	54	21	25	"Putative amidoligase enzyme"
1570	Cthe_1728	1452	65	80	41	47	37	43	"DNA (cytosine-5-)-methyltransferase"
1571	Cthe_1729	1236	11	16	25	30	23	29	"DNA methylase N-4/N-6 domain protein"
1572	Cthe_1731	381	8	11	16	24	10	15	"HNH endonuclease"
1573	Cthe_1732	405	83	98	87	100	19	24	"DUF1492 domain-containing protein"
1574	Cthe_1733	303	12	14	10	12	5	7	"Hypothetical protein"
1575	Cthe_1734	1875	201	222	223	245	46	53	"Phage/plasmid primase"
1576	Cthe_1735	1692	57	64	83	111	41	49	"DNA polymerase B region"
1577	Cthe_1736	459	59	79	61	55	28	24	"Protein of unknown function DUF669"
1578	Cthe_1737	1593	151	178	119	133	68	75	"Phage NTP-binding protein"
1579	Cthe_1738	366	82	93	49	57	36	42	"VRR-NUC domain-containing protein"
1580	Cthe_1739	1128	145	152	169	155	58	53	"SNF2-related protein"
1581	Cthe_1740	765	62	79	76	89	23	27	"Prophage antirepressor"
1582	Cthe_1741	252	27	34	21	30	27	36	"Hypothetical protein"
1583	Cthe_1742	324	12	15	14	18	9	12	"Transcriptional regulator, putative"
1584	Cthe_1743	711	683	634	2115	1977	917	1122	"ImmA/IrrE family metallo-endopeptidase"
1585	Cthe_1744	369	1684	1823	2082	2277	3314	3068	"Hypothetical protein"
1586	Cthe_1745	381	914	1077	2002	2156	6520	6822	"XRE family transcriptional regulator"
1587	Cthe_1746	789	379	437	1413	1566	1012	1244	"ImmA/IrrE family metallo-endopeptidase"
1588	Cthe_1747	417	205	238	254	288	50	66	"T/G mismatch-specific endonuclease"
1589	Cthe_1748	1554	4172	4377	4165	4256	2108	1900	"Restriction endonuclease, type II, AlwI"
1590	Cthe_1749	1053	5281	5577	6508	6734	596	670	"DNA (cytosine-5)-methyltransferase 1"
1591	Cthe_1750	210	137	167	359	388	190	240	"XRE family transcriptional regulator"
1592	Cthe_1751	1362	630	688	261	289	227	255	"23S rRNA (uracil(1939)-C(5))-methyltransferase RlmD"
1593	Cthe_1752	801	975	1044	1749	1833	522	477	"ABC transporter ATP-binding protein"
1594	Cthe_1753	1047	2584	2689	1429	1478	498	523	"Iron complex transport system permease protein"
1595	Cthe_1754	957	1991	2122	2594	2687	915	1078	"Periplasmic binding protein"
1596	Cthe_1756	1167	7727	8021	11302	12670	10818	11300	"Zinc-ribbon domain-containing protein"
1597	Cthe_1757	930	1230	1280	2186	2355	3564	3680	"Peptidase M23"
1598	Cthe_1758	438	650	687	1157	1244	1744	1855	"Polymer-forming cytoskeletal protein"
1599	Cthe_1759	672	74	89	863	934	418	478	"Sporulation protein YunB"
1600	Cthe_1760	2475	4697	4577	6567	6422	5730	5620	"PBP1A family penicillin-binding protein"
1601	Cthe_1761	1209	4072	4133	1805	1970	1867	2003	"FtsX-like permease family protein"
1602	Cthe_1762	1266	4860	4940	1491	1554	2211	2344	"RND family efflux transporter MFP subunit"
1603	Cthe_1763	741	2684	2788	896	1045	1664	1788	"ABC-type antimicrobial peptide transport system, ATPase component"
1604	Cthe_1764	1089	2848	2988	2928	3132	2167	2288	"TolC family protein"
1605	Cthe_1765	1152	3696	3834	6244	6377	4185	4355	"Outer membrane protein, TolC family protein"
1606	Cthe_1766	834	2801	2945	4909	5144	4254	4411	"Glutamate 5-kinase"
1607	Cthe_1767	1002	1556	1644	816	789	864	822	"GGGtGRT protein"
1608	Cthe_1768	693	1244	1367	1073	1233	665	720	"Hypothetical protein"
1609	Cthe_1770	372	3796	3922	6478	6632	3146	3008	"Hypothetical protein"
1610	Cthe_1771	555	2838	2640	4240	4088	3315	3255	"Rubrerythrin family protein"
1611	Cthe_1772	789	411	377	275	322	783	832	"YdcF family protein"
1612	Cthe_1773	2445	3081	3244	4408	4577	4131	4255	"Peptidase S16, lon-like protein"
1613	Cthe_1774	459	1453	1577	442	490	1159	1330	"SSU ribosomal protein S18P alanine acetyltransferase"
1614	Cthe_1775	711	751	820	977	1078	1764	1888	"tRNA (adenosine(37)-N6)-threonylcarbamoyltransferase complex dimerization subunit type 1 TsaB"
1615	Cthe_1776	486	1354	1478	525	610	1400	1467	"tRNA (adenosine(37)-N6)-threonylcarbamoyltransferase complex ATPase subunit type 1 TsaE"
1616	Cthe_1777	1203	3858	4002	2554	2680	3959	4230	"Amidohydrolase"
1617	Cthe_1778	960	3208	3000	2595	2700	3425	3577	"Copper amine oxidase N-terminal domain-containing protein"
1618	Cthe_1779	393	332	289	433	420	250	223	"Hypothetical protein"
1619	Cthe_1780	534	251	215	213	187	229	203	"AAA family ATPase"
1620	Cthe_1781	318	110	135	301	345	199	245	"Hypothetical protein"
1621	Cthe_1782	393	6158	6378	1149	1256	2010	2145	"30S ribosomal protein S9"
1622	Cthe_1783	438	11444	13244	1418	1577	3771	3866	"50S ribosomal protein L13"
1623	Cthe_1784	396	2014	2244	9892	10230	6088	6177	"Hypothetical protein"
1624	Cthe_1785	1083	798	723	1298	1200	2431	2588	"DNA integrity scanning, DisA, linker region"
1625	Cthe_1786	1365	2433	2560	4808	5130	3512	3640	"DNA repair protein RadA"
1626	Cthe_1787	1935	6757	6813	9419	9673	8416	8759	"Glycoside hydrolase 15-related protein"
1627	Cthe_1788	1257	383	433	436	488	244	277	"Glycosyl transferase family 2"
1628	Cthe_1789	2457	13515	12289	93453	94855	42200	42890	"ATP-dependent Clp protease ATP-binding subunit "
1629	Cthe_1790	1023	2830	3104	25179	26690	6990	7255	"Arginine kinase"
1630	Cthe_1791	507	1125	1377	4612	4745	2749	2880	"Hypothetical protein"
1631	Cthe_1792	462	6069	5867	10848	10233	11471	10567	"Transcriptional repressor, CtsR"
1632	Cthe_1793	705	51	68	280	310	329	356	"DUF1624 domain-containing family"
1633	Cthe_1794	2088	1571	1466	2280	2412	4127	4355	"Translation elongation factor G"
1634	Cthe_1795	1026	13338	14532	12890	13488	15587	16433	"3-deoxy-7-phosphoheptulonate synthase"
1635	Cthe_1796	1098	24134	25673	28024	28799	38533	40533	"Prephenate dehydrogenase"
1636	Cthe_1797	1272	7280	7351	7650	7466	14084	15388	"3-phosphoshikimate 1-carboxyvinyltransferase"
1637	Cthe_1798	654	12179	11340	24361	22786	3510	3322	"Redox-sensing transcriptional repressor Rex"
1638	Cthe_1799	1917	6750	6523	25663	24109	12963	12022	"ABC-F type ribosomal protection protein"
1639	Cthe_1800	1512	779	701	2282	2177	1950	2311	"LysM peptidoglycan-binding domain-containing protein"
1640	Cthe_1801	765	6308	6511	3283	3328	4878	4950	"ABC-type cobalt transport system, ATPase component"
1641	Cthe_1802	810	6101	6450	4166	4322	4401	4670	"Cobalt ABC transporter, inner membrane subunit CbiQ"
1642	Cthe_1803	1059	7560	7755	5883	6123	8052	8244	"Cobalamin (vitamin B12) biosynthesis CbiM protein"
1643	Cthe_1804	723	971	1072	845	980	1159	1100	"Cell wall hydrolase/autolysin"
1644	Cthe_1805	933	1034	1089	2416	2511	1205	1132	"Response regulator receiver modulated diguanylate cyclase"
1645	Cthe_1806	6534	5210	5570	13025	12422	18254	20322	"Dockerin type 1, cellulosome protein"
1646	Cthe_1807	1665	102809	104773	103504	107833	7016	7387	"Hypothetical protein"
1647	Cthe_1809	540	104879	102781	138943	136002	66457	67030	"Sigma-70 family RNA polymerase sigma factor"
1648	Cthe_1810	2253	553	635	3344	3541	10555	10077	"Peptidase M56 BlaR1"
1649	Cthe_1811	375	75	89	1293	1205	4675	4577	"Transcriptional repressor, CopY family"
1650	Cthe_1812	789	24	20	145	167	20	17	"Urease accessory protein UreD"
1651	Cthe_1813	609	26	30	60	68	23	32	"Urease accessory protein UreG"
1652	Cthe_1814	723	18	23	35	43	16	19	"Urease accessory protein UreF"
1653	Cthe_1815	462	32	38	77	84	21	28	"Urease accessory protein UreE"
1654	Cthe_1816	1719	186	170	248	230	107	95	"Urease, alpha subunit"
1655	Cthe_1817	369	39	45	19	22	24	29	"Urease, beta subunit"
1656	Cthe_1818	303	38	35	36	30	21	18	"Urease, gamma subunit"
1657	Cthe_1819	705	47	53	85	100	64	73	"Urea ABC transporter, ATP-binding protein UrtE"
1658	Cthe_1820	759	41	45	85	78	23	27	"Urea ABC transporter, ATP-binding protein UrtD"
1659	Cthe_1821	1149	37	45	632	680	41	50	"Urea ABC transporter, permease protein UrtC"
1660	Cthe_1822	909	10	14	38	44	22	27	"Urea ABC transporter, permease protein UrtB"
1661	Cthe_1823	1260	28	32	124	110	36	43	"Urea ABC transporter, urea binding protein"
1662	Cthe_1824	1089	100	121	129	164	86	93	"Two component transcriptional regulator, AraC family"
1663	Cthe_1825	2799	701	778	627	588	283	245	"Hpt sensor hybrid histidine kinase"
1664	Cthe_1826	1092	1112	1332	2507	2643	582	548	"Response regulator receiver sensor signal transduction histidine kinase"
1665	Cthe_1827	972	898	970	666	710	207	238	"Copper amine oxidase N-terminal domain-containing protein"
1666	Cthe_1828	594	547	602	600	665	201	244	"Hypothetical protein"
1667	Cthe_1829	3297	8	14	162	193	62	80	"Chromosome segregation ATPases-like protein"
1668	Cthe_1830	1215	1427	1570	556	670	302	350	"Pilus assembly protein"
1669	Cthe_1833	810	2878	3076	434	480	974	1209	"Copper amine oxidase-like domain-containing protein"
1670	Cthe_1834	594	949	1177	248	278	112	132	"Hypothetical protein"
1671	Cthe_1835	3309	60	73	10	17	33	40	"Viral A-type inclusion repeat-containing protein"
1672	Cthe_1836	969	57592	59130	13056	13577	15608	17124	"Hypothetical protein"
1673	Cthe_1837	510	2801	3013	7223	7560	2492	2588	"Hypothetical protein"
1674	Cthe_1838	1860	6275	6078	9081	9244	9213	9350	"Glycoside hydrolase family 10, xylanase C"
1675	Cthe_1839	1062	4971	4832	19892	20459	15311	15703	"[FeFe] hydrogenase H-cluster radical SAM maturase HydE"
1676	Cthe_1840	936	1479	1582	1231	1340	2539	2670	"Cysteine synthase A"
1677	Cthe_1841	810	906	988	1891	2156	979	1145	"ATP-utilizing enzymes of the PP-loop superfamily"
1678	Cthe_1842	1293	2045	2177	1846	1671	1287	1155	"Homocysteine synthase"
1679	Cthe_1843	450	2347	2530	4286	4560	1677	1540	"Rrf2 family transcriptional regulator"
1680	Cthe_1844	462	1710	1954	2461	2550	720	800	"Rrf2 family transcriptional regulator"
1681	Cthe_1845	918	11093	12573	12036	12904	10067	10890	"Homoserine O-succinyltransferase"
1682	Cthe_1846	1392	810	779	696	740	1034	960	"HAMP domain-containing protein"
1683	Cthe_1847	705	291	340	438	480	579	610	"Response regulator transcription factor"
1684	Cthe_1848	2232	1387	1460	2803	2955	2740	2990	"Copper-translocating P-type ATPase"
1685	Cthe_1849	1500	715	850	1158	1270	827	950	"Heavy metal transport/detoxification protein"
1686	Cthe_1850	492	73	86	362	410	236	288	"DUF2381 domain-containing protein"
1687	Cthe_1851	594	2607	2768	12251	12890	12467	13422	"Putative ABC transporter permease"
1688	Cthe_1852	891	8499	8421	7097	6930	4824	4577	"Hsp33 family molecular chaperone, HslO"
1689	Cthe_1853	201	17420	16890	4288	4680	5824	5609	"Cold-shock DNA-binding domain protein"
1690	Cthe_1854	321	751	790	428	486	337	374	"Methylated-DNA/protein-cysteine methyltransferase"
1691	Cthe_1855	699	1352	1560	1934	2247	1832	1975	"Class I SAM-dependent methyltransferase"
1692	Cthe_1856	174	1038	1309	479	520	508	570	"Small acid-soluble spore protein beta"
1693	Cthe_1857	1290	1565	1490	1161	1256	1309	1245	"Carboxyl-terminal protease"
1694	Cthe_1858	1128	4069	3872	4217	4155	6238	6078	"Peptidoglycan DD-metalloendopeptidase family protein"
1695	Cthe_1859	885	2082	1934	2566	2446	3931	4055	"ABC transporter permease"
1696	Cthe_1860	708	1493	1420	2201	2068	1594	1460	"Cell division ATP-binding protein FtsE"
1697	Cthe_1861	1086	2306	2167	5524	5389	3263	3010	"Transcriptional regulator, CdaR"
1698	Cthe_1862	1113	5073	5277	4886	4940	6980	7178	"sn-glycerol-3-phosphate ABC transporter ATP-binding protein UgpC"
1699	Cthe_1863	1041	4169	4050	2566	2377	1008	945	"N-acetyl-gamma-glutamyl-phosphate reductase"
1700	Cthe_1864	915	7675	7830	6264	6150	1648	1560	"Acetylglutamate kinase, argB"
1701	Cthe_1865	663	3681	3842	5356	5560	1590	1510	"Type IV pilus assembly protein PilZ"
1702	Cthe_1866	1203	12702	11377	19334	20374	4932	4873	"Aspartate aminotransferase family protein"
1703	Cthe_1867	1065	10350	10776	13660	13004	5104	5023	"Glutamine-hydrolyzing carbamoyl-phosphate synthase small subunit"
1704	Cthe_1868	3204	18319	19557	23172	25477	12947	12177	"Carbamoyl-phosphate synthase, large subunit"
1705	Cthe_1869	924	6013	6070	5733	5875	4534	4788	"Ornithine carbamoyltransferase"
1706	Cthe_1870	477	2650	2469	2549	2677	1966	2255	"GNAT family N-acetyltransferase"
1707	Cthe_1871	1878	1456	1588	750	790	1070	1289	"Tn7-like transposition protein D"
1708	Cthe_1872	1656	3276	3477	3068	3288	2546	2790	"TniB family protein"
1709	Cthe_1873	1344	2984	3388	4993	5255	3712	4044	"HMG-I and HMG-Y, DNA-binding"
1710	Cthe_1874	1224	495	560	1349	1204	987	1144	"Transposase, mutator type"
1711	Cthe_1875	777	52	60	200	223	68	77	"DDE-type integrase/transposase/recombinase"
1712	Cthe_1876	855	71	85	297	324	102	134	"Heteromeric transposase endonuclease subunit TnsA"
1713	Cthe_1877	870	258	288	8166	8500	507	545	"Hypothetical protein"
1714	Cthe_1878	795	264	300	6473	6677	477	534	"Hypothetical protein"
1715	Cthe_1879	375	133	160	2989	2788	194	188	"Helix-turn-helix transcriptional regulator"
1716	Cthe_1883	2067	221	250	343	374	186	205	"ATP-dependent endonuclease"
1717	Cthe_1886	837	903	960	2063	2230	1905	2122	"IS3-like element IS120 family transposase"
1718	Cthe_1888	1584	53	60	233	250	143	188	"Hypothetical protein"
1719	Cthe_1890	2133	608	655	7657	7890	365	400	"Leucine-rich repeat protein"
1720	Cthe_1891	288	41	49	1390	1248	242	214	"Hypothetical protein"
1721	Cthe_1893	669	226	245	1527	1577	269	278	"FtsW/RodA/SpoVE family cell cycle protein"
1722	Cthe_1894	444	713	758	6124	6344	1947	2235	"FtsW/RodA/SpoVE family cell cycle protein"
1723	Cthe_1895	348	5253	5432	39919	40588	2295	2477	"Transcriptional regulator, PadR-like family"
1724	Cthe_1896	762	827	767	1640	1587	615	585	"Metallophosphoesterase"
1725	Cthe_1897	327	66	58	165	174	33	26	"Hypothetical protein"
1726	Cthe_1899	870	3975	3655	2855	2745	2649	2542	"M15B family D-Ala-D-Ala carboxypeptidase VanY"
1727	Cthe_1900	798	4	6	17	20	20	25	"Transposase and inactivated derivatives, IS30 family"
1728	Cthe_1901	1224	445	423	1086	1033	889	934	"Transposase, mutator type"
1729	Cthe_1902	879	64	72	240	260	106	125	"Pyridoxal-5'-phosphate-dependent protein beta subunit"
1730	Cthe_1903	738	14	20	315	302	42	48	"Polysaccharide deacetylase"
1731	Cthe_1904	5502	38	45	181	210	67	88	"Amino acid adenylation domain protein"
1732	Cthe_1905	1233	26	23	90	95	46	51	"Glycosyltransferase family 28"
1733	Cthe_1906	1212	48	61	144	166	64	75	"Glycosyltransferase family 28"
1734	Cthe_1907	1878	31	37	155	175	40	55	"Amino acid adenylation domain protein"
1735	Cthe_1908	2889	2733	2577	3573	3466	1616	1549	"Tetratricopeptide (TPR) repeat protein"
1736	Cthe_1909	1473	1656	1730	1844	1944	1031	1240	"Copper amine oxidase"
1737	Cthe_1910	1248	1375	1166	1305	1188	1031	1180	"Hypothetical protein"
1738	Cthe_1911	3873	6205	6344	3811	3890	4927	5122	"Carbohydrate binding family 6"
1739	Cthe_1912	1608	8428	8550	11467	11823	14282	15134	"Copper amine oxidase N-terminal domain-containing protein"
1740	Cthe_1913	798	1863	1723	2210	2049	2902	2744	"Hypothetical protein"
1741	Cthe_1914	1281	2658	2782	2888	3018	9247	9567	"Hypothetical protein"
1742	Cthe_1915	1392	801	840	2005	2170	8657	8799	"Integral membrane sensor signal transduction histidine kinase"
1743	Cthe_1916	687	1324	1239	2181	2377	10748	10244	"Two component transcriptional regulator, winged helix family"
1744	Cthe_1917	2718	5363	5577	2373	2443	2779	2640	"ATPase, P-type (transporting), HAD superfamily, subfamily IC"
1745	Cthe_1918	1461	9543	9874	11483	11888	4427	4677	"Arginine decarboxylase"
1746	Cthe_1919	699	357	378	1564	1744	452	489	"MgtC/SapB transporter"
1747	Cthe_1920	699	95	86	168	190	104	130	"Stage II sporulation protein R"
1748	Cthe_1921	345	11553	10879	694	725	255	280	"Transcriptional regulator, PadR-like family"
1749	Cthe_1922	969	2147	2088	126	110	31	25	"Hypothetical protein"
1750	Cthe_1923	1629	6639	6433	5720	5630	2181	2034	"CTP synthase"
1751	Cthe_1924	1219	136	123	271	289	126	134	"Transposase and inactivated derivatives, IS30 family"
1752	Cthe_1926	1227	456	432	224	203	470	445	"Hedgehog/intein hint domain protein"
1753	Cthe_1927	816	138	166	343	367	59	66	"Hypothetical protein"
1754	Cthe_1928	1002	690	740	711	734	397	372	"Hypothetical protein"
1755	Cthe_1929	609	519	480	165	140	492	453	"Hedgehog/intein hint domain protein"
1756	Cthe_1930	1518	2281	2580	1104	1166	727	834	"Carboxyl-terminal processing protease"
1757	Cthe_1931	1566	3241	3356	3037	3011	1595	1477	"S-layer homology domain-containing protein"
1758	Cthe_1932	3006	512	566	734	781	146	193	"S-layer homology domain-containing protein"
1759	Cthe_1933	636	2392	2458	1298	1366	852	888	"MBL fold metallo-hydrolase"
1760	Cthe_1934	678	349	378	1162	1388	362	388	"CPBP family intramembrane metalloprotease"
1761	Cthe_1935	1695	7693	7780	19246	21667	6044	6477	"Arginine--tRNA ligase"
1762	Cthe_1936	468	2727	2977	3197	3308	1260	1109	"DUF1934 domain-containing protein"
1763	Cthe_1937	807	867	950	3126	3189	1163	1234	"Glutamate racemase"
1764	Cthe_1938	1131	2128	2245	4641	4837	2060	2277	"D-alanine--D-alanine ligase"
1765	Cthe_1939	1335	1006	1166	1542	1367	1014	977	"Magnesium transporter"
1766	Cthe_1940	741	2815	2672	4231	4177	4038	3740	"RDD domain containing protein"
1767	Cthe_1941	249	105	125	578	623	350	376	"Regulatory protein, FmdB family"
1768	Cthe_1942	900	1758	1588	2699	2544	2795	2678	"Lipoprotein LpqB, GerMN domain-containing protein"
1769	Cthe_1943	684	2469	2303	3109	3038	2120	2234	"Deoxyribose-phosphate aldolase"
1770	Cthe_1944	549	4206	4133	10615	9655	3137	3004	"Hypothetical protein"
1771	Cthe_1945	894	10277	9855	9797	9644	9319	9573	"NAD(P)/FAD-dependent oxidoreductase"
1772	Cthe_1946	1284	6124	6077	7459	7230	4765	4568	"Thioredoxin-disulfide reductase"
1773	Cthe_1947	597	1192	1023	1601	1689	1870	1745	"Peroxiredoxin"
1774	Cthe_1948	669	590	550	604	586	761	734	"Cytochrome c biogenesis protein transmembrane region"
1775	Cthe_1953	705	13	18	19	25	7	11	"Cell wall hydrolase, SleB"
1776	Cthe_1954	864	145	200	619	643	123	135	"Hypothetical protein"
1777	Cthe_1955	2157	3099	3208	4307	4389	1871	1722	"RNA-binding transcriptional accessory protein"
1778	Cthe_1956	933	3121	3388	5067	5280	1268	1351	"1-phosphofructokinase"
1779	Cthe_1957	1341	2689	2898	3714	3940	3165	3321	"Carbohydrate ABC transporter substrate-binding protein"
1780	Cthe_1958	966	132	113	218	200	533	566	"UV damage repair endonuclease"
1781	Cthe_1959	735	306	322	218	230	1233	1357	"Class I SAM-dependent methyltransferase"
1782	Cthe_1960	1083	22835	23846	27646	29103	15346	15889	"Peptidoglycan-binding domain 1 protein"
1783	Cthe_1961	2451	1323	1413	2910	2988	2384	2455	"NTP transferase domain-containing protein"
1784	Cthe_1962	963	397	374	568	546	308	290	"Pseudouridine synthase, RluA family"
1785	Cthe_1963	2514	15512	14586	15034	13893	10234	8910	"Glycoside hydrolase family 10, xylanase Z"
1786	Cthe_1964	1530	10116	9834	21817	23044	39804	41744	"Alkyl hydroperoxide reductase subunit F"
1787	Cthe_1965	564	3187	3320	7997	8129	15606	17450	"Peroxiredoxin"
1788	Cthe_1966	327	85	80	52	44	59	51	"Hypothetical protein"
1789	Cthe_1967	1737	398	364	629	640	249	278	"Cell division protein FtsK"
1790	Cthe_1968	3201	453	423	807	837	327	346	"Cell divisionFtsK/SpoIIIE"
1791	Cthe_1969	1380	272	244	342	329	168	145	"Hypothetical protein"
1792	Cthe_1970	306	169	155	357	343	122	110	"Hypothetical protein"
1793	Cthe_1971	330	129	110	104	90	100	86	"Hypothetical protein"
1794	Cthe_1972	321	44	50	45	53	27	30	"Hypothetical protein"
1795	Cthe_1973	1524	790	756	1455	1376	261	235	"Tetratricopeptide repeat protein"
1796	Cthe_1974	564	328	366	1958	1887	2967	2756	"Hypothetical protein"
1797	Cthe_1977	327	71	89	309	367	21	33	"Hypothetical protein"
1798	Cthe_1979	1353	746	813	327	345	385	403	"Protein of unknown function DUF1557"
1799	Cthe_1981	390	37	34	30	26	13	11	"Hypothetical protein"
1800	Cthe_1982	243	23	27	27	32	34	38	"SPRY domain containing protein"
1801	Cthe_1983	1185	5	7	28	25	12	17	"IS110 family transposase"
1802	Cthe_1985	1272	26	32	81	94	27	32	"Phage major capsid protein, HK97 family"
1803	Cthe_1986	2154	47	52	142	166	35	39	"Phage/plasmid primase, P4 family"
1804	Cthe_1987	393	1509	1578	1396	1467	549	623	"Hypothetical protein"
1805	Cthe_1989	1675	354	331	170	150	250	230	"Intein N-terminal splicing region"
1806	Cthe_1990	348	6	9	14	20	23	28	"Hypothetical protein"
1807	Cthe_1991	987	29	34	61	78	8	13	"Transposase, mutator type"
1808	Cthe_1998	756	196	174	234	211	110	137	"Intein N-terminal splicing region"
1809	Cthe_2002	477	168	190	173	189	126	145	"Hypothetical protein"
1810	Cthe_2003	594	49	57	108	133	42	52	"Hypothetical protein"
1811	Cthe_2006	666	690	655	553	586	1405	1533	"Hypothetical protein"
1812	Cthe_2008	519	134	150	103	119	72	84	"Hypothetical protein"
1813	Cthe_2010	1239	347	378	473	522	194	245	"DUF1910 domain-containing protein"
1814	Cthe_2011	888	37	43	80	92	16	21	"Intein N-terminal splicing region"
1815	Cthe_2015	384	29	35	84	96	57	67	"Hypothetical protein"
1816	Cthe_2018	1236	2708	2780	1147	1189	1102	1167	"DUF1910 domain-containing protein"
1817	Cthe_2019	1848	468	495	165	189	153	178	"Hypothetical protein"
1818	Cthe_2020	792	8	14	15	18	5	7	"Hypothetical protein"
1819	Cthe_2021	393	822	845	876	934	368	455	"Hypothetical protein"
1820	Cthe_2024	1191	102	140	42	60	39	52	"Transposase IS110 family protein"
1821	Cthe_2025	558	88	95	43	54	20	30	"Recombinase family protein"
1822	Cthe_2029	804	385	420	775	845	300	335	"Hypothetical protein"
1823	Cthe_2030	1677	1307	1509	318	370	1904	2033	"Intein N-terminal splicing region"
1824	Cthe_2031	477	1975	2144	1079	1277	1664	1886	"Transposase IS200-family protein"
1825	Cthe_2032	6015	3312	3578	3820	3921	2120	2340	"Hypothetical protein"
1826	Cthe_2033	315	14	18	29	44	12	17	"Hypothetical protein"
1827	Cthe_2034	1884	887	943	4235	4509	479	522	"Serine/threonine-protein kinase"
1828	Cthe_2035	521	78	95	109	126	50	59	"Methylase involved in ubiquinone/manaquinone biosynthesis
1829	Cthe_2036	657	184	205	364	388	128	110	"Amidohydrolase 2"
1830	Cthe_2037	1529	7	10	6	11	10	16	"Transposase and inactivated derivatives"
1831	Cthe_2038	2424	109	93	385	350	48	55	"Dockerin type 1 cellulosome"
1832	Cthe_2039	3756	587	505	464	487	1059	1165	"DNA helicase/exodeoxyribonuclease V, subunit A"
1833	Cthe_2040	3441	668	742	1328	1467	1427	1521	"DNA helicase/exodeoxyribonuclease V, subunit B"
1834	Cthe_2041	450	25	31	72	78	81	90	"Hypothetical protein"
1835	Cthe_2044	603	13	21	119	150	16	20	"Hypothetical protein"
1836	Cthe_2045	807	96	112	201	235	71	84	"Intein N-terminal splicing region"
1837	Cthe_2046	513	325	357	264	289	169	182	"Hypothetical protein"
1838	Cthe_2047	1701	1690	2020	1058	1204	728	755	"Protein of unknown function DUF1557"
1839	Cthe_2048	522	248	270	59	65	75	84	"Hypothetical protein"
1840	Cthe_2049	885	278	290	187	194	213	244	"Protein of unknown function DUF324"
1841	Cthe_2050	840	386	398	246	266	215	231	"CRISPR-associated RAMP protein"
1842	Cthe_2051	783	458	488	90	102	192	200	"CRISPR-associated RAMP protein"
1843	Cthe_2052	393	299	326	13	18	243	271	"Hypothetical protein"
1844	Cthe_2053	1248	744	778	175	189	300	340	"Hypothetical protein"
1845	Cthe_2054	546	297	330	266	290	289	321	"Uncharacterized protein predicted to be involved in DNA repair (RAMP superfamily)"
1846	Cthe_2055	1920	995	1122	2514	2644	916	1022	"Hypothetical protein"
1847	Cthe_2056	942	253	211	1444	1233	190	222	"Hypothetical protein"
1848	Cthe_2057	1833	658	688	2472	2578	798	745	"TIGR02221 family CRISPR-associated protein"
1849	Cthe_2058	528	1204	1288	2288	2377	805	844	"O-acetyl-ADP-ribose deacetylase"
1850	Cthe_2059	645	1503	1577	1641	1732	604	654	"RNA polymerase, sigma-24 subunit, ECF subfamily"
1851	Cthe_2060	834	4139	4244	3364	3516	1342	1504	"RNA methyltransferase, TrmH family, group 3"
1852	Cthe_2061	423	558	588	2777	2544	204	178	"Ribonuclease III"
1853	Cthe_2062	1536	27	24	58	55	29	30	"GerA spore germination protein"
1854	Cthe_2063	1122	2	3	11	15	22	28	"Spore germination protein"
1855	Cthe_2064	1272	5	6	12	15	16	19	"Germination protein, Ger(X)C family"
1856	Cthe_2065	1407	5338	5588	6016	6133	11008	12574	"Cysteinyl-tRNA synthetase"
1857	Cthe_2066	747	1510	1599	2052	2231	5108	4932	"Serine O-acetyltransferase"
1858	Cthe_2067	408	70	83	623	605	175	188	"Membrane protein of unknown function"
1859	Cthe_2068	888	890	832	1617	1677	1832	1943	"8-oxoguanine DNA glycosylase-like protein"
1860	Cthe_2069	777	1093	1678	4337	4200	4185	3239	"Hypothetical protein"
1861	Cthe_2070	858	1639	1500	1441	1565	1784	1634	"Asp23/Gls24 family envelope stress response protein"
1862	Cthe_2071	924	74	79	146	175	106	143	"Sporulation protein YtxC"
1863	Cthe_2072	753	124	130	222	277	203	242	"Hypothetical protein"
1864	Cthe_2073	1182	1308	1148	4401	4471	1573	1207	"Amidohydrolase"
1865	Cthe_2074	219	79	70	387	430	222	250	"DUF378 domain-containing protein"
1866	Cthe_2075	729	2048	2177	2316	2234	1248	1001	"DNA-binding regulatory protein, YebC/PmpR family"
1867	Cthe_2076	1164	123	150	391	466	316	323	"Periplasmic sensor signal transduction histidine kinase"
1868	Cthe_2077	381	445	482	632	674	696	742	"CoA-binding domain protein"
1869	Cthe_2078	660	973	912	860	914	1105	1178	"YigZ family protein"
1870	Cthe_2079	567	2191	2384	5145	5400	2257	2455	"Thylakoidal processing peptidase"
1871	Cthe_2080	573	413	384	1085	1230	1751	1655	"NUDIX hydrolase"
1872	Cthe_2081	1749	2714	2412	3783	3888	7414	7577	"GTP-binding proten HflX"
1873	Cthe_2082	240	736	802	82	89	3548	3688	"Hypothetical protein"
1874	Cthe_2083	1200	4788	4890	7857	8255	10652	12389	"DNA-directed DNA polymerase"
1875	Cthe_2084	294	58	64	160	185	44	57	"Hypothetical protein"
1876	Cthe_2085	519	1499	1322	1142	1256	1837	1978	"Deoxyuridine 5'-triphosphate nucleotidohydrolase Dut"
1877	Cthe_2086	2520	3958	4133	3691	3577	7043	6866	"Peptidase U32, collagenase"
1878	Cthe_2087	885	3693	3578	3530	3684	7096	7231	"Peptidase"
1879	Cthe_2088	411	4084	4233	3432	3366	7349	7643	"Cell division ZapA"
1880	Cthe_2089	2226	23318	25861	89909	90345	144205	165009	"Glycoside hydrolase family 48, exoglucanase S"
1881	Cthe_2090	579	32328	29870	19212	16779	10661	8023	"Zinc-ribbon domain-containing protein"
1882	Cthe_2091	1299	89	93	58	63	74	79	"Hypothetical protein"
1883	Cthe_2092	855	2960	2733	2691	2855	2133	2569	"Dimethyladenosine transferase"
1884	Cthe_2093	1059	30866	25455	30406	22788	26558	17890	"DUF348 domain-containing protein"
1885	Cthe_2094	552	99	190	111	85	384	305	"Hypothetical protein"
1886	Cthe_2095	768	2350	2455	1790	1880	3099	3450	"TatD family hydrolase"
1887	Cthe_2096	1965	4319	4523	3081	3351	5160	5367	"Methionine--tRNA ligase"
1888	Cthe_2097	1044	8	12	217	276	60	64	"DUF2600 family protein"
1889	Cthe_2098	534	24	35	16	22	39	50	"Nucleoside recognition"
1890	Cthe_2099	633	11	16	68	85	53	75	"Nucleoside recognition"
1891	Cthe_2100	240	1778	1933	6713	6922	943	989	"Transcriptional regulator, AbrB family"
1892	Cthe_2101	843	592	574	815	856	1542	1730	"16S rRNA (cytidine(1402)-2'-O)-methyltransferase"
1893	Cthe_2102	756	157	168	522	570	644	623	"Methyltransferase type 11"
1894	Cthe_2103	183	6278	6422	15820	16156	10897	11233	"4Fe-4S ferredoxin iron-sulfur binding domain protein"
1895	Cthe_2104	876	3472	3342	3155	3241	3266	3210	"PSP1 domain protein"
1896	Cthe_2105	990	4303	4455	2260	2123	4477	4231	"DNA polymerase III, delta prime subunit"
1897	Cthe_2106	453	851	880	625	670	4167	4045	"YaaR family protein"
1898	Cthe_2107	684	2053	2256	1785	1903	6060	6304	"Thymidylate kinase"
1899	Cthe_2108	1458	3933	4334	6006	6303	13361	13586	"Arginine decarboxylase"
1900	Cthe_2109	2538	5395	5477	10272	11233	10205	11467	"Copper amine oxidase"
1901	Cthe_2110	774	92	86	171	188	508	531	"ABC-type antimicrobial peptide transport system, ATPase component"
1902	Cthe_2111	2058	33	48	443	489	421	444	"ABC transporter permease"
1903	Cthe_2112	702	187	199	862	892	791	814	"Response regulator transcription factor"
1904	Cthe_2113	1026	255	288	926	1155	1064	1096	"HAMP domain-containing histidine kinase"
1905	Cthe_2115	288	1281	1140	2176	2028	1045	1177	"Thiamine-binding protein"
1906	Cthe_2116	762	1318	1232	1357	1311	1350	1238	"Binding-protein-dependent transport systems inner membrane component"
1907	Cthe_2117	1029	1581	1513	1717	1680	1585	1468	"Putative sulfonate transport system substrate-binding protein"
1908	Cthe_2118	753	1466	1538	1513	1578	1729	1789	"ABC-type nitrate/sulfonate/bicarbonate transport system, ATPase component"
1909	Cthe_2119	2283	6855	6934	11343	11899	3572	3674	"Glycoside hydrolase family 10, RsgI6"
1910	Cthe_2120	762	1635	1703	2613	2667	399	433	"RNA polymerase sigma-I factor, SigI6"
1911	Cthe_2121	918	2018	2244	5094	5173	3456	3522	"Hypothetical protein"
1912	Cthe_2123	1413	185	200	220	238	267	284	"Trypanosome RHS"
1913	Cthe_2124	1354	276	290	42	50	330	303	"Multidrug resistance efflux pump"
1914	Cthe_2125	912	53	62	127	144	177	187	"Binding-protein-dependent transport systems (msdC1)"
1915	Cthe_2126	855	29	36	108	133	288	321	"Permease component (msdC2)"
1916	Cthe_2127	795	359	378	799	835	361	381	"MoxR-like ATPases (nbdC)"
1917	Cthe_2128	1383	509	545	962	1103	274	293	"Sugar-binding periplasmic protein (CbpC)"
1918	Cthe_2129	201	32	44	112	145	115	130	"Hypothetical protein"
1919	Cthe_2130	1293	33917	30400	29559	27066	13203	11255	"Protein of unknown function DUF2089"
1920	Cthe_2131	369	6362	6680	6887	7003	2719	2988	"DUF2089 domain-containing protein"
1921	Cthe_2132	1299	178	270	2186	1890	549	666	"Predicted ATPases"
1922	Cthe_2133	612	78	123	1109	1336	256	289	"RloB domain-containing protein"
1923	Cthe_2137	2373	84	97	549	522	242	211	"Carbohydrate binding family 6"
1924	Cthe_2138	1743	484	536	560	594	66	89	"Glycoside hydrolase family 43"
1925	Cthe_2139	2949	495	555	952	1230	345	400	"Alpha-L-arabinofuranosidase B"
1926	Cthe_2140	1323	1028	890	765	877	1089	1135	"DUF4830 domain-containing protein"
1927	Cthe_2141	1188	1108	1230	622	650	1333	1474	"HD domain-containing protein"
1928	Cthe_2142	600	3685	3900	1915	2233	1460	1534	"Recombination protein RecR"
1929	Cthe_2143	342	1017	1056	718	755	660	699	"YbaB/EbfC family nucleoid-associated protein"
1930	Cthe_2144	1644	7548	7755	9105	9348	1708	2077	"DNA polymerase III, subunits gamma and tau"
1931	Cthe_2145	968	286	245	221	256	173	189	"Hypothetical protein"
1932	Cthe_2146	342	40	37	42	40	20	15	"Copper amine oxidase N-terminal domain-containing protein"
1933	Cthe_2147	1983	1182	976	2464	2377	872	985	"Glycoside hydrolase family 5, endoglucanase CelO"
1934	Cthe_2148	765	1130	1010	750	899	2367	2688	"Hypothetical protein"
1935	Cthe_2149	1290	1366	1555	1445	1720	3598	3890	"Protoporphyrinogen oxidase"
1936	Cthe_2150	1347	1488	1304	2911	3140	3433	3660	"Hypothetical protein"
1937	Cthe_2151	2196	2720	2990	9435	9873	8849	9355	"Hypothetical protein"
1938	Cthe_2152	519	930	1230	4757	4980	4150	4450	"GtrA family protein"
1939	Cthe_2154	876	332	388	9032	9266	2264	2560	"Class I SAM-dependent methyltransferase"
1940	Cthe_2155	1896	357	398	535	577	492	540	"S-layer domain-containing protein"
1941	Cthe_2156	279	10	8	11	9	26	29	"Hypothetical protein"
1942	Cthe_2157	333	77	89	78	85	120	133	"Hypothetical protein"
1943	Cthe_2159	861	4916	5235	654	730	941	1144	"Carbohydrate-binding domain-containing protein"
1944	Cthe_2160	2394	6039	6120	7766	7533	3471	3120	"Spore coat protein CotH"
1945	Cthe_2161	882	2151	2455	5908	6134	16808	14377	"Hypothetical protein"
1946	Cthe_2162	717	966	1089	1060	1144	868	923	"Peptidase C26"
1947	Cthe_2163	336	1823	1980	1480	1566	2430	2678	"STAS domain-containing protein"
1948	Cthe_2164	159	216	233	721	784	572	635	"Rubredoxin-type Fe(Cys)4 protein"
1949	Cthe_2166	1137	2872	2677	5668	5549	2340	2449	"Putative PAS/PAC sensor protein"
1950	Cthe_2167	1143	66	88	633	750	339	370	"Glycoside hydrolase"
1951	Cthe_2168	2196	2242	2089	5506	5389	8439	9044	"Peptidase M4"
1952	Cthe_2169	822	647	606	943	1038	635	605	"Metallophosphoesterase"
1953	Cthe_2170	1110	10	18	35	43	9	15	"Amidase domain-containing protein"
1954	Cthe_2171	2970	12299	11987	10067	11248	12684	10356	"Type III restriction protein res subunit"
1955	Cthe_2172	213	1194	1038	1085	935	2489	2346	"Ribosomal protein L31"
1956	Cthe_2174	1962	54147	52467	75892	78923	83875	86734	"Transcription termination factor Rho"
1957	Cthe_2175	669	838	923	1929	2255	1048	1120	"Hypothetical protein"
1958	Cthe_2176	879	177	208	450	489	545	578	"CPBP family intramembrane metalloprotease"
1959	Cthe_2178	462	271	305	6116	6344	1365	1588	"Carboxypeptidase regulatory-like domain-containing protein"
1960	Cthe_2179	2769	3489	3577	5824	6155	1424	1677	"Pectate lyase/Amb allergen"
1961	Cthe_2180	1308	763	888	6812	7013	4045	3789	"Cl-channel voltage-gated family protein"
1962	Cthe_2181	714	634	590	2295	2155	969	914	"PP-loop domain protein"
1963	Cthe_2182	2790	4662	4388	5436	5588	4538	4875	"Phosphodiester glycosidase family protein"
1964	Cthe_2183	870	4174	4088	6503	6871	8780	9155	"UTP--glucose-1-phosphate uridylyltransferase GalU"
1965	Cthe_2185	285	5668	5522	2067	1889	1683	1430	"30S ribosomal protein S18"
1966	Cthe_2186	417	8074	8188	3758	3557	1517	1622	"Single-strand binding protein"
1967	Cthe_2187	288	9336	9877	7386	8003	3228	3478	"Ribosomal protein S6"
1968	Cthe_2189	1248	5745	5520	30979	32897	13533	15388	"Diguanylate cyclase with GAF sensor"
1969	Cthe_2190	1182	85	103	200	222	127	143	"N-acetylglucosamine-6-phosphate deacetylase"
1970	Cthe_2191	2214	1197	1088	5923	6403	2338	2244	"1,4-alpha-glucan branching enzyme GlgB"
1971	Cthe_2192	591	25	32	208	189	11	14	"Hypothetical protein"
1972	Cthe_2193	2847	4161	3890	4518	4423	8001	8123	"Xylanase, CtXyl5A"
1973	Cthe_2194	1506	69	60	157	143	77	71	"Carbohydrate binding protein"
1974	Cthe_2195	2898	55	68	214	255	78	89	"Carbohydrate binding family 6, xylanase E XynE"
1975	Cthe_2196	1602	10	14	33	40	23	31	"Glycoside hydrolase family 43"
1976	Cthe_2197	2787	16	22	233	180	36	48	"Beta-galactosidase/beta-glucuronidase"
1977	Cthe_2202	738	1019	970	2309	2388	2802	3006	"DUF3784 domain-containing protein"
1978	Cthe_2203	564	3161	3322	1837	2034	4350	4500	"GTP cyclohydrolase I FolE"
1979	Cthe_2204	2649	521	604	1494	1320	445	488	"Cyanophycin synthetase"
1980	Cthe_2205	810	4	7	15	18	17	20	"Cyanophycinase"
1981	Cthe_2207	1176	22	28	95	121	124	166	"Beta-aspartyl-peptidase"
1982	Cthe_2208	588	18714	19833	28249	30457	12905	13667	"Transcriptional repressor, LexA family"
1983	Cthe_2209	1089	1906	2220	2758	2612	3302	3122	"3-isopropylmalate dehydrogenase"
1984	Cthe_2210	570	735	704	704	680	1581	1504	"3-isopropylmalate dehydratase, small subunit"
1985	Cthe_2211	1260	2282	2433	1742	1888	2259	2355	"3-isopropylmalate dehydratase, large subunit"
1986	Cthe_2212	909	644	690	1664	1780	969	1099	"Transcriptional regulator, AraC family"
1987	Cthe_2213	618	384	344	733	790	937	1090	"DUF2179 domain-containing protein"
1988	Cthe_2214	942	42	48	750	700	38	43	"Alpha/beta fold hydrolase"
1989	Cthe_2215	948	831	922	6825	6511	3326	3008	"Mg2+ transporter protein CorA family protein"
1990	Cthe_2216	489	346	322	500	555	222	244	"FlgN family protein"
1991	Cthe_2217	405	188	199	178	200	228	205	"Flagellar protein FliS"
1992	Cthe_2218	2517	645	680	711	740	552	612	"Flagellar hook-associated 2 domain-containing protein"
1993	Cthe_2219	396	82	72	32	29	176	163	"Flagellar protein FlaG protein"
1994	Cthe_2220	945	60	73	59	70	84	93	"NAD-dependent epimerase/dehydratase"
1995	Cthe_2221	1170	99	112	56	75	154	189	"DegT/DnrJ/EryC1/StrS aminotransferase"
1996	Cthe_2222	1065	155	177	134	155	179	198	"Glycosyltransferase 28-like protein"
1997	Cthe_2223	684	183	204	125	188	155	190	"LmbE family protein"
1998	Cthe_2224	693	180	200	111	144	121	150	"Methionyl-tRNA formyltransferase"
1999	Cthe_2225	411	19	23	37	45	52	62	"Glyoxalase/bleomycin resistance protein/dioxygenase"
[truncated: 1,028 more rows]
